# Supplementary material
Source: PubMed Central journal article supplement (PMC3375340)

## Supporting Information

### Discovery of Selective Menaquinone Biosynthesis Inhibitors against *Mycobacterium tuberculosis*

*Joy Debnath,<sup>†</sup> Shajila Siricilla,<sup>†</sup> Bajoie Wan,<sup>‡</sup> Dean C. Crick,<sup>ℓ</sup> Anne J. Lenaerts,<sup>ℓ</sup> Scott G. Franzblau,<sup>‡</sup> and Michio Kurosu<sup>\*,†</sup>*

<sup>†</sup>*Department of Pharmaceutical Sciences, College of Pharmacy, University of Tennessee, 881 Madison, Memphis, TN 38163, United States*

<sup>‡</sup>*Institute for Tuberculosis Research, College of Pharmacy, University of Illinois at Chicago, 833 S. Wood Street, Chicago, Illinois 60612, United States*

<sup>ℓ</sup>*Department of Microbiology, Immunology and Pathology, Colorado State University, 200 West Lake Street, Fort Collins, Colorado 80523, United States*

### MenA Inhibitory Assay:

The substrate 1,4-dihydroxy-2-naphthanoic acid (DHNA) (500  $\mu$ M; 20  $\mu$ l),  $MgCl_2$  (5  $\mu$ M; 20  $\mu$ l); CHAPS (0.1%; 20  $\mu$ l), Tris-buffer (pH = 8; 20  $\mu$ l), membrane bound Men A (100  $\mu$ l), inhibitors (0- 60  $\mu$ g/ml of DMSO) and farnesylpyrophosphate (200  $\mu$ M, 40  $\mu$ l) were mixed together and incubated for 2 h at 37  $^{\circ}$ C. After the incubation, the reaction mixture was quenched with 0.1 M AcOH in MeOH followed by the extraction with hexane (thrice). The organic portions were then concentrated and diluted with MeOH (300  $\mu$ l). From each set of enzymatic reaction mixture 20  $\mu$ l was injected into the HPLC and the area of the peak for DMMK was quantified to get the  $IC_{50}$  value for different inhibitor molecules.

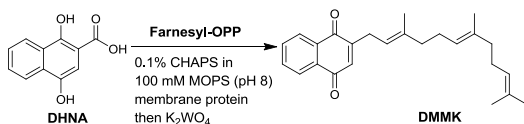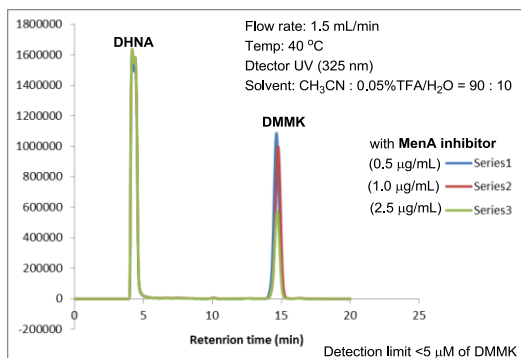

A representative MenA inhibition curve with different concentrations of (R)-12

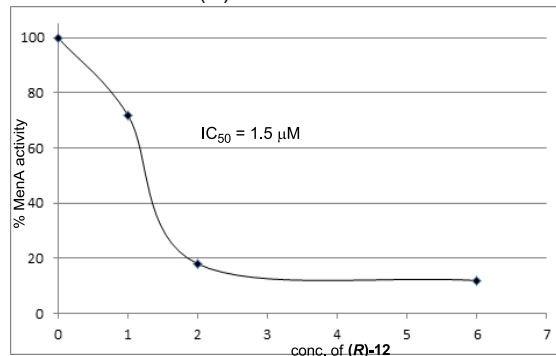

### Oxygen consumption assay:

Into sterile glass vials 1.5 ml of *M. tuberculosis* (grown to 0.5 OD value) was placed. 80  $\mu$ l of inhibitor molecules (total concentration ranged from 5-100  $\mu$ g/ml) and 0.01% methylene blue was added. The glass vials were kept at 37  $^{\circ}$ C for 22h. The effective concentrations of the inhibitor molecule at which the electron transport systems were inhibited were determined by comparing the color intensity with the control vial (no inhibitor).

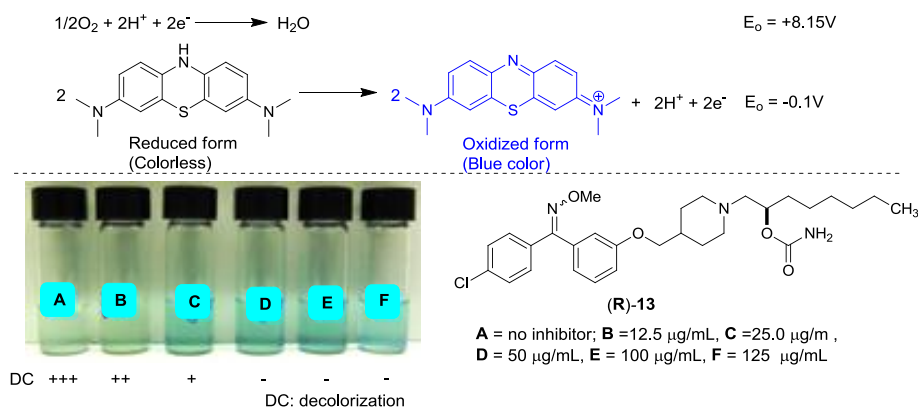

## Cytotoxicities (IC<sub>50</sub>) of (R)-12, (R)-13, atovaquone, and rifampin in HepG2 cells.

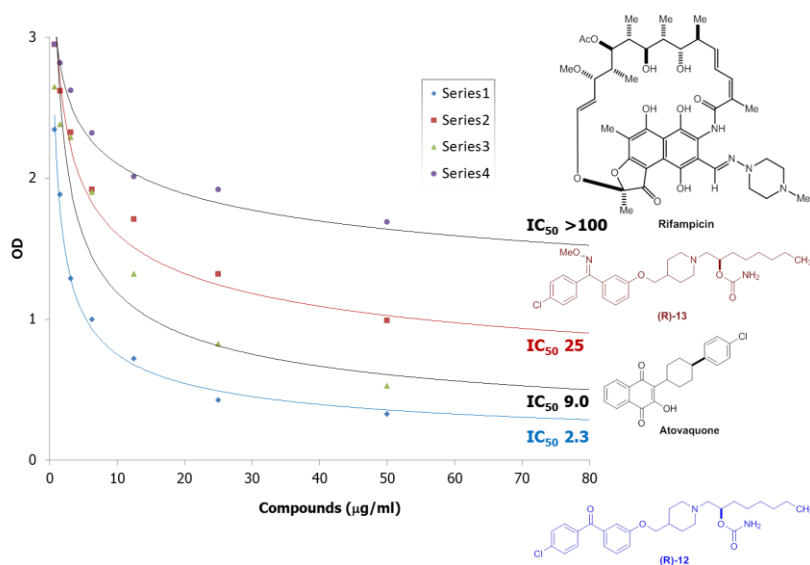

## *E. coli* Growth Inhibitory Assays under Anaerobic Conditions:

The *E. coli* was grown under anaerobic conditions using the following growth media.

### Growth Media:

Pancreatic Digest of Casein, 20.0 g  
 Yeast Extract, 10.0 g  
 Resazurin, 0.001 g  
 Calcium Chloride, anhydrous, 0.008 g  
 Magnesium Sulfate, anhydrous, 0.008 g  
 Potassium Phosphate, monobasic, 0.04 g  
 Potassium Phosphate, dibasic, 0.04 g  
 Sodium Chloride, 0.08 g  
 Sodium Bicarbonate, 0.4 g  
 Hemin (0.1% Soln), 5.0 mL  
 L-Cysteine, 0.5 g  
 Distilled Water, 1000.0 mL

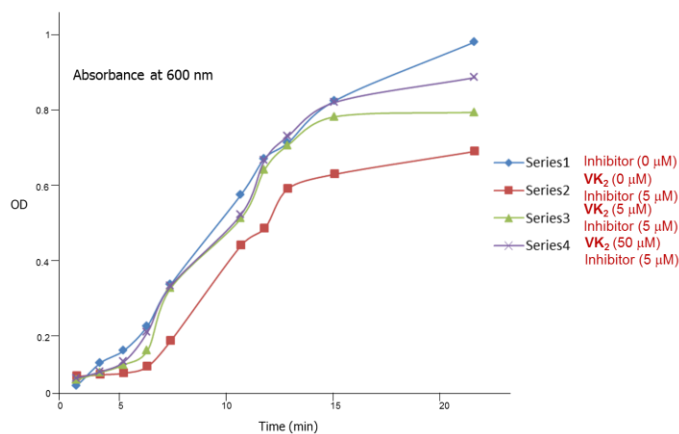

*E. coli* was grown with inhibitor molecule (5 µg/mL) under anaerobic conditions in the media summarized above, and the growth curve was monitored photometrically by reading the optical density at 600 nm. Similarly, *E. coli* growth rescue studies were performed by supplementing menaquinone (50 µM).

Copies of NMR Spectra and HPLC Analysis of New Compounds (follow):

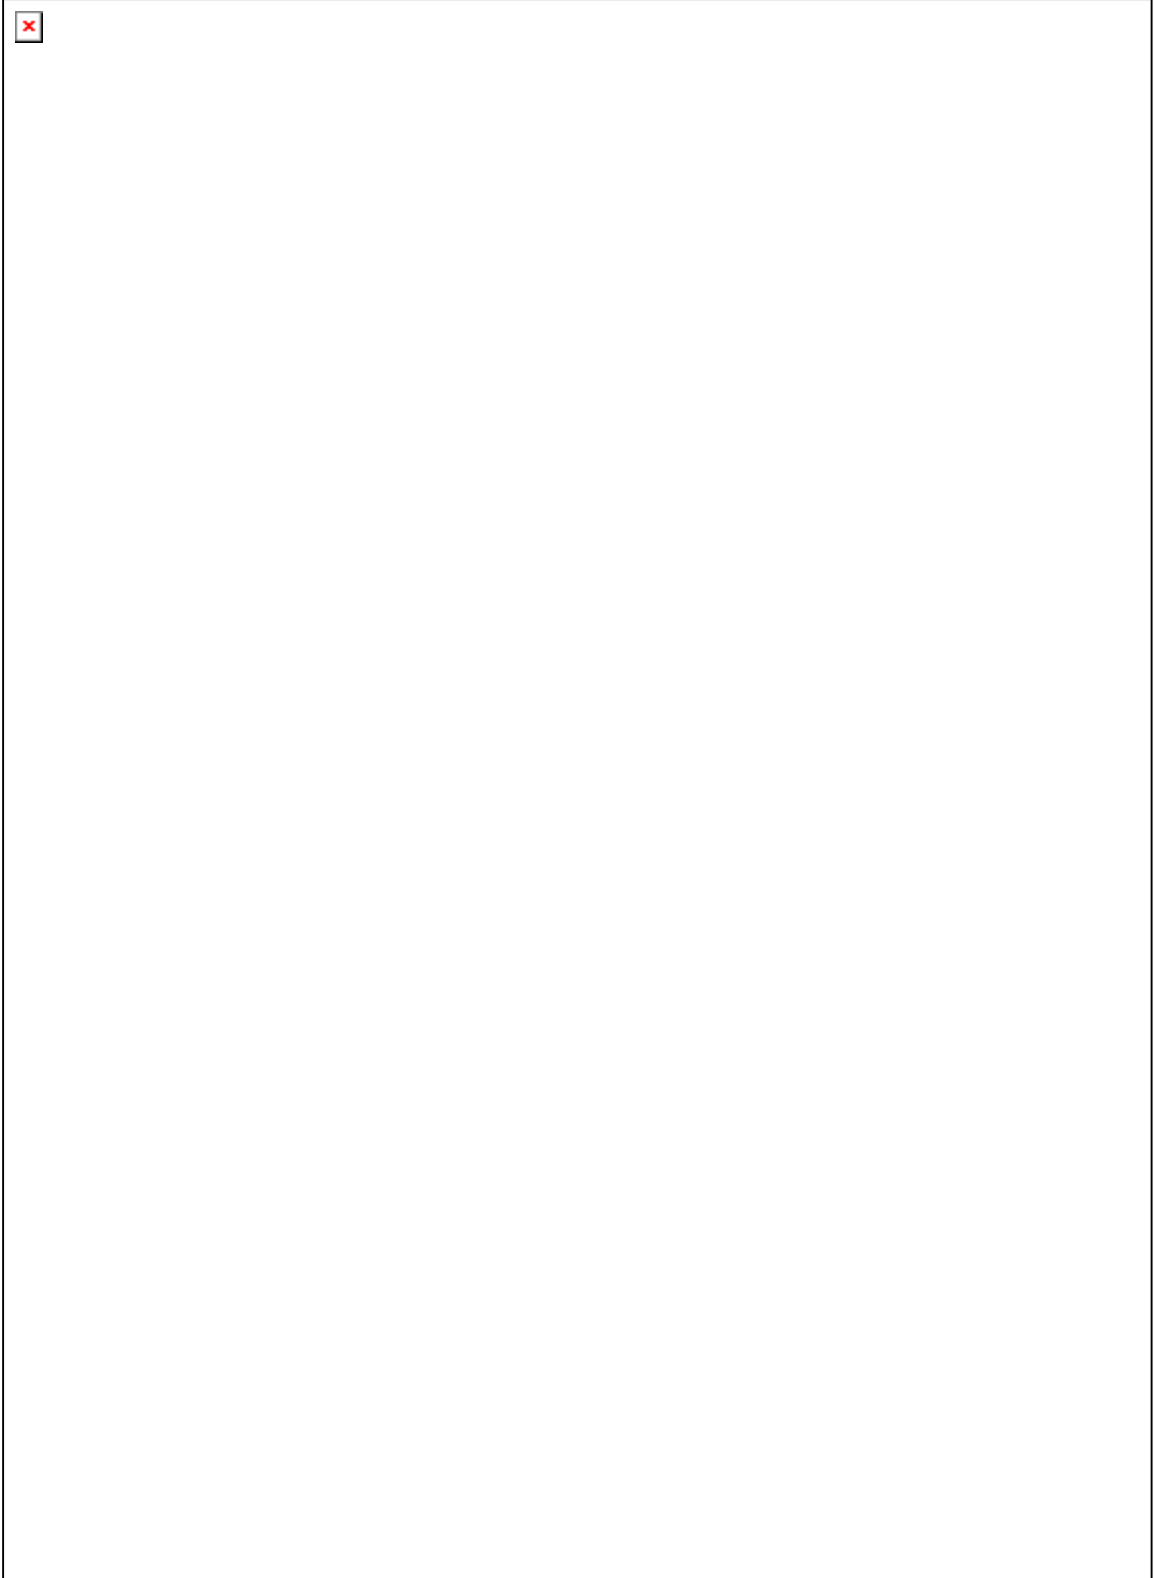





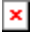













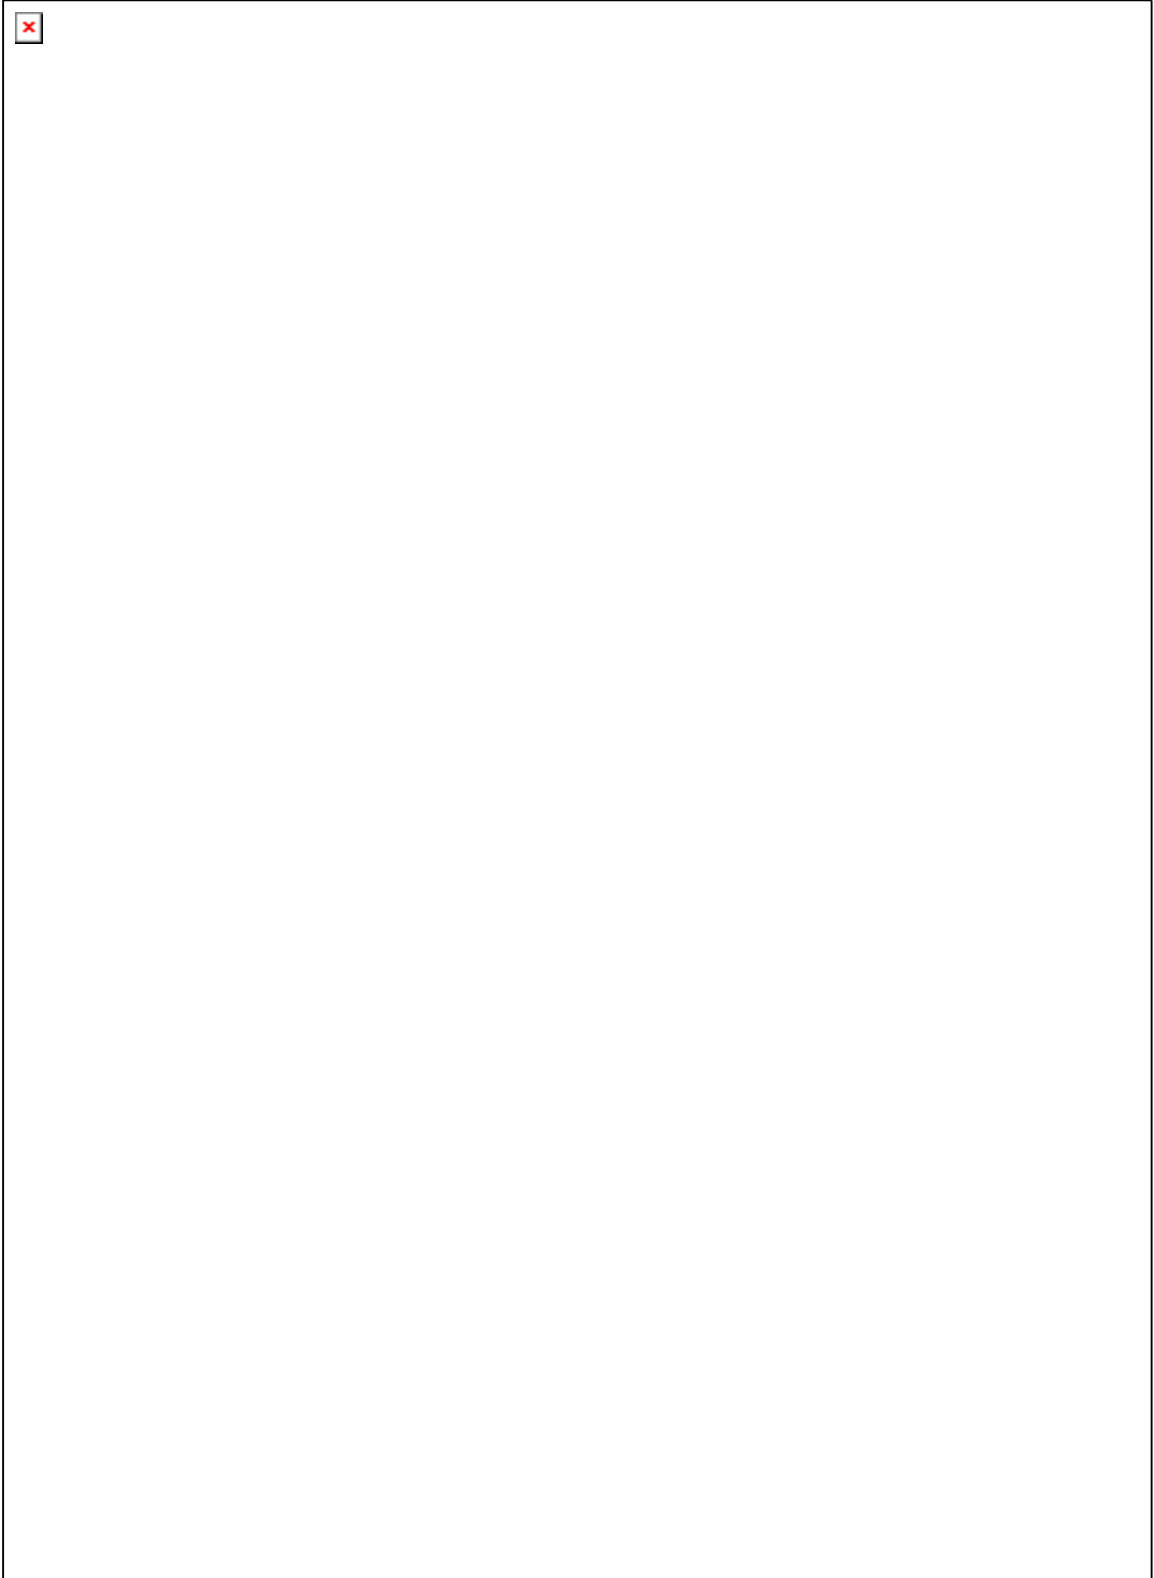

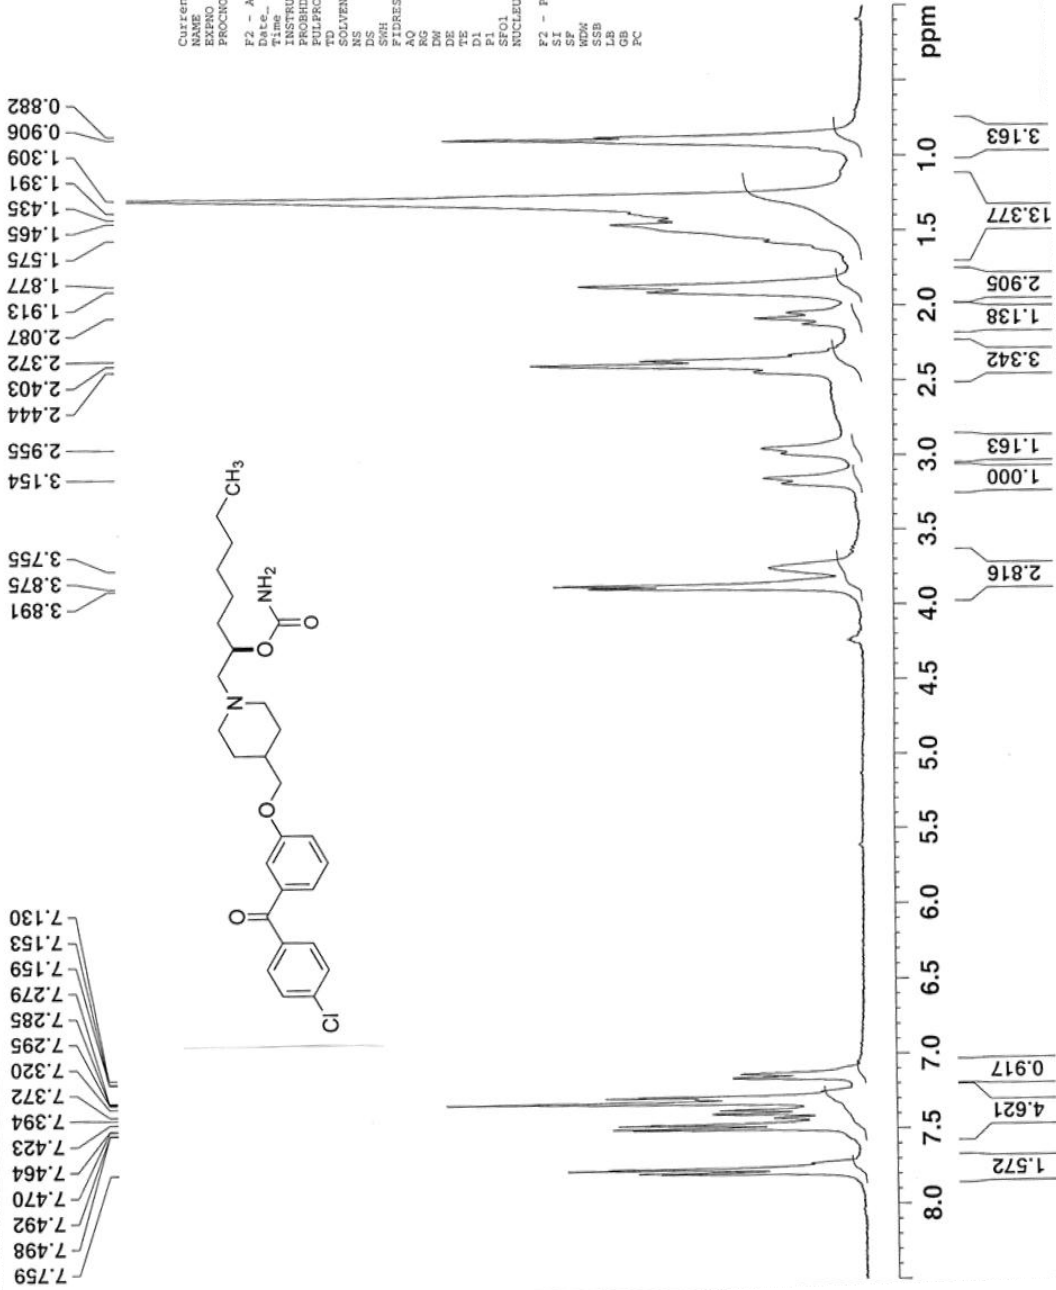



## ==== Shimadzu LabSolutions Analysis Report ====

C:\LabSolutions\Data\Project1\Joy Data\HPLC-Compound\Sample-24.lcd  
Acquired by : System Administrator  
Sample Name : JD-07-16-2011  
Sample ID :  
Tray# : 1  
Vial# : 1  
Injection Volume : 1  
Data File : C:\LabSolutions\Data\Project1\Joy Data\HPLC-Compound\Sample-24.lcd  
Method File : C:\LabSolutions\Data\Project1\Joy training\Mixture-235nm-62%ACN.lcm  
Report Format File : C:\LabSolutions\System\DEFAULT.lsr  
Month-Day Acquired : 10/5/2011  
Month-Day Processed : 10/5/2011

## &lt;Chromatogram&gt;

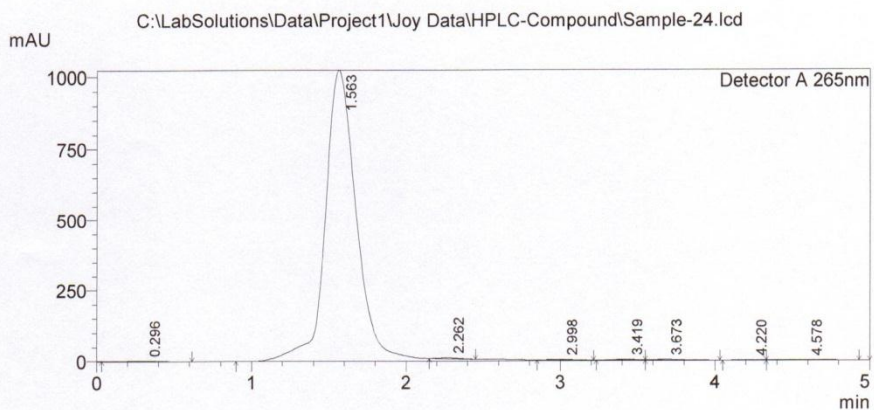

MS Chromatogram

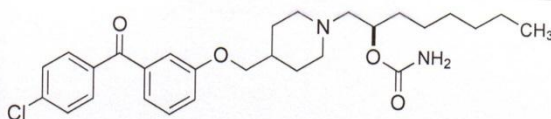

Column: Phenomenex kinetex 2.6 $\mu$  C18 100A, 100 x 4.60 mm  
Solvent: CH<sub>3</sub>CN/0.05%TFA in H<sub>2</sub>O = 25/1  
flow rate: 0.5 mL/min.

C:\LabSolutions\Data\Project1\Joy Data\HPLC-Compound\Sample-24.lcd



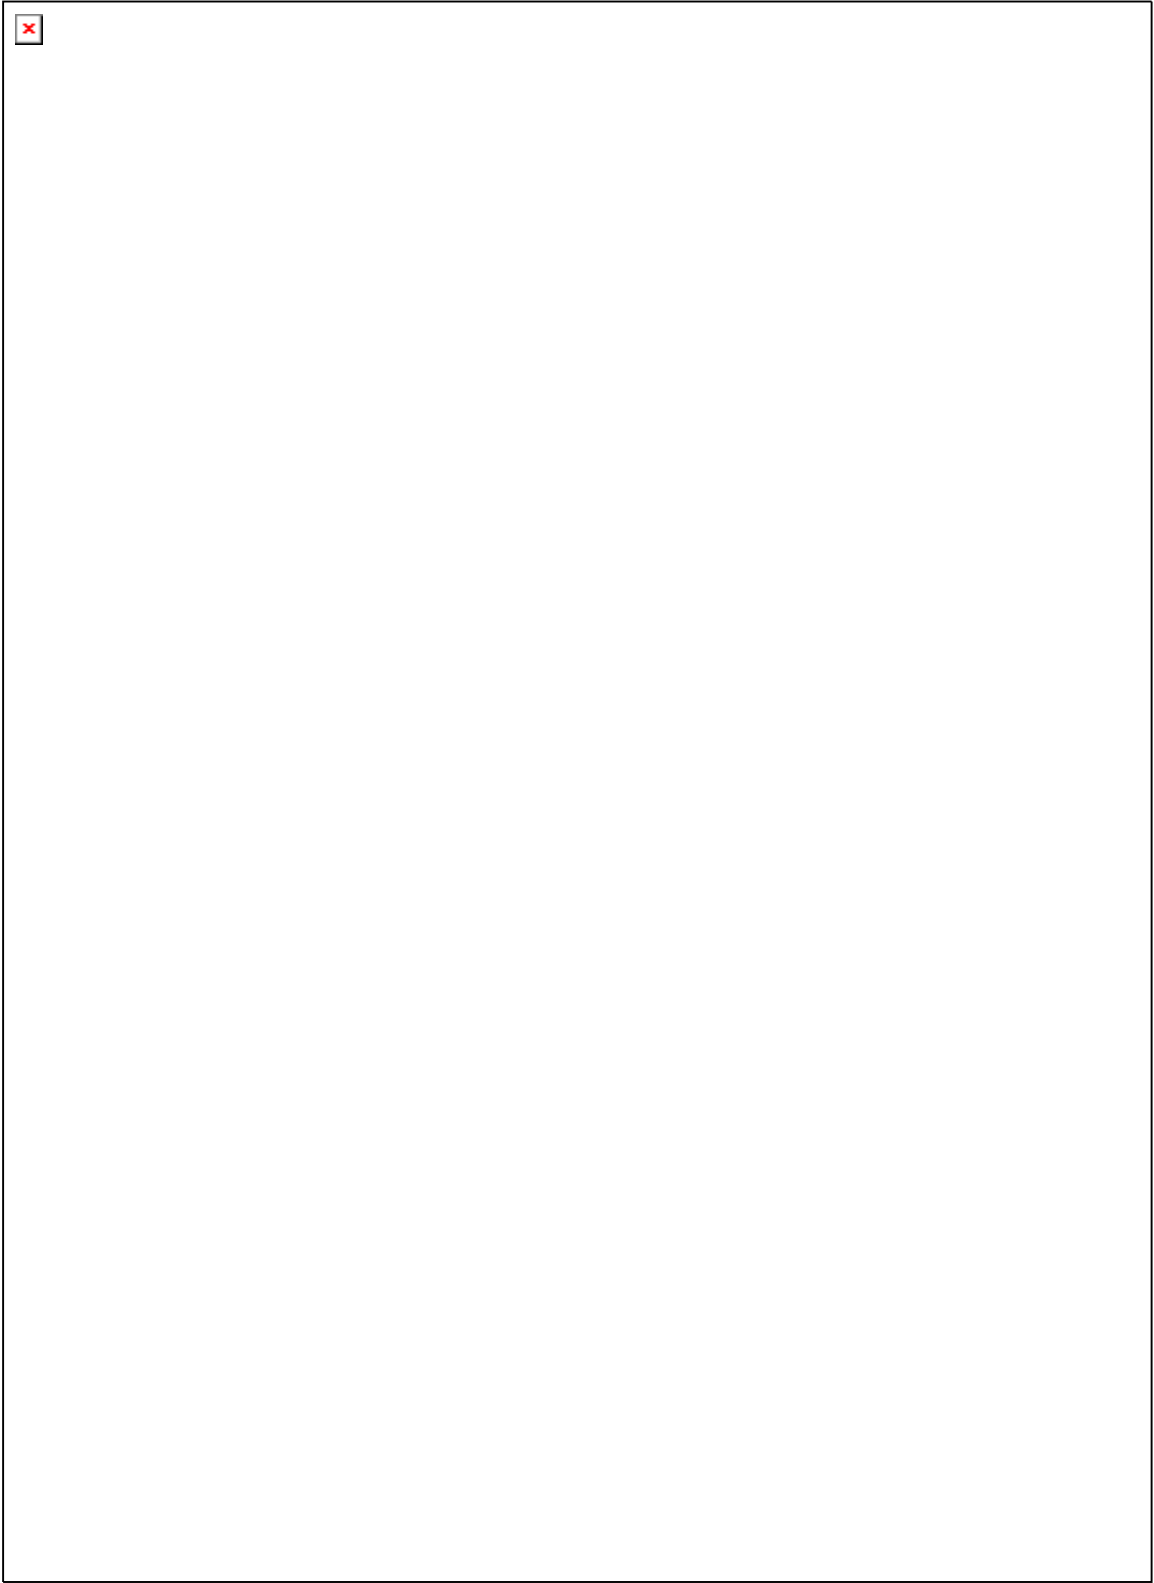



## ==== Shimadzu LabSolutions Analysis Report ====

C:\LabSolutions\Data\Project1\Joy Data\HPLC-Compound\Sample-26.lcd  
Acquired by : System Administrator  
Sample Name : JD-07-16-2011  
Sample ID :  
Tray# : 1  
Vial# : 1  
Injection Volume : 1  
Data File : C:\LabSolutions\Data\Project1\Joy Data\HPLC-Compound\Sample-26.lcd  
Method File : C:\LabSolutions\Data\Project1\Joy training\Mixture-235nm-62%ACN.lcm  
Report Format File : C:\LabSolutions\System\DEFAULT.lsr  
Month-Day Acquired : 10/5/2011  
Month-Day Processed : 10/5/2011

## &lt;Chromatogram&gt;

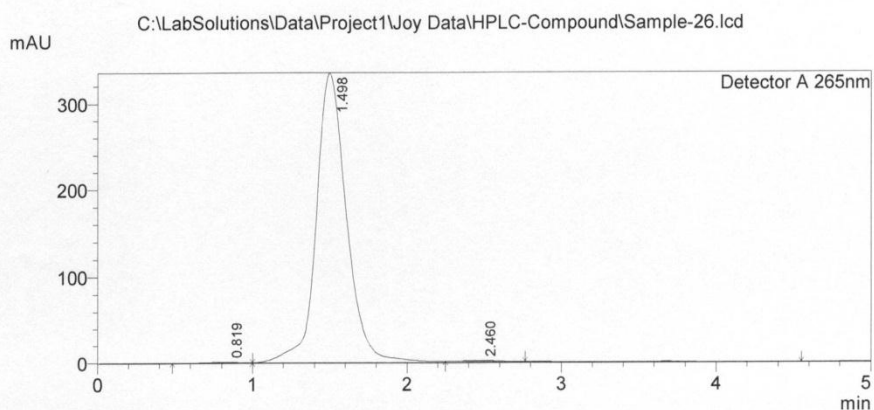

MS Chromatogram

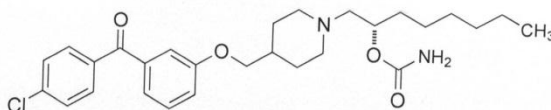

Column: Phenomenex kinetex 2.6 $\mu$  C18 100A, 100 x 4.60 mm  
Solvent: CH<sub>3</sub>CN/0.05%TFA in H<sub>2</sub>O = 25/1  
flow rate: 0.5 mL/min.

C:\LabSolutions\Data\Project1\Joy Data\HPLC-Compound\Sample-26.lcd





JD-103  
 Sample Name:  
 JD-103  
 Data Collected on:  
 bi37621-inova500  
 Archive directory:  
 /mnt/vmrsys/data  
 Sample directory:  
 JD-103\_20110628\_01  
 FID file: data\_s2pul\_001  
 Pulse Sequence: PROTON (s2pul)  
 Solvent: CDCl3  
 Data collected on: Jun 28 2011  
 Operator: vnmr1  
 Relax. delay 1.000 sec  
 Pulse 45.0 degrees  
 Acq. time 2.048 sec  
 Width 7999.2 Hz  
 16 repetitions  
 QF1 1.000000  
 DATA PROCESSING  
 FT size 32768  
 Total time 0 min 49 sec

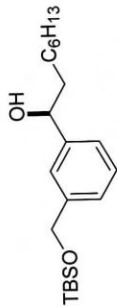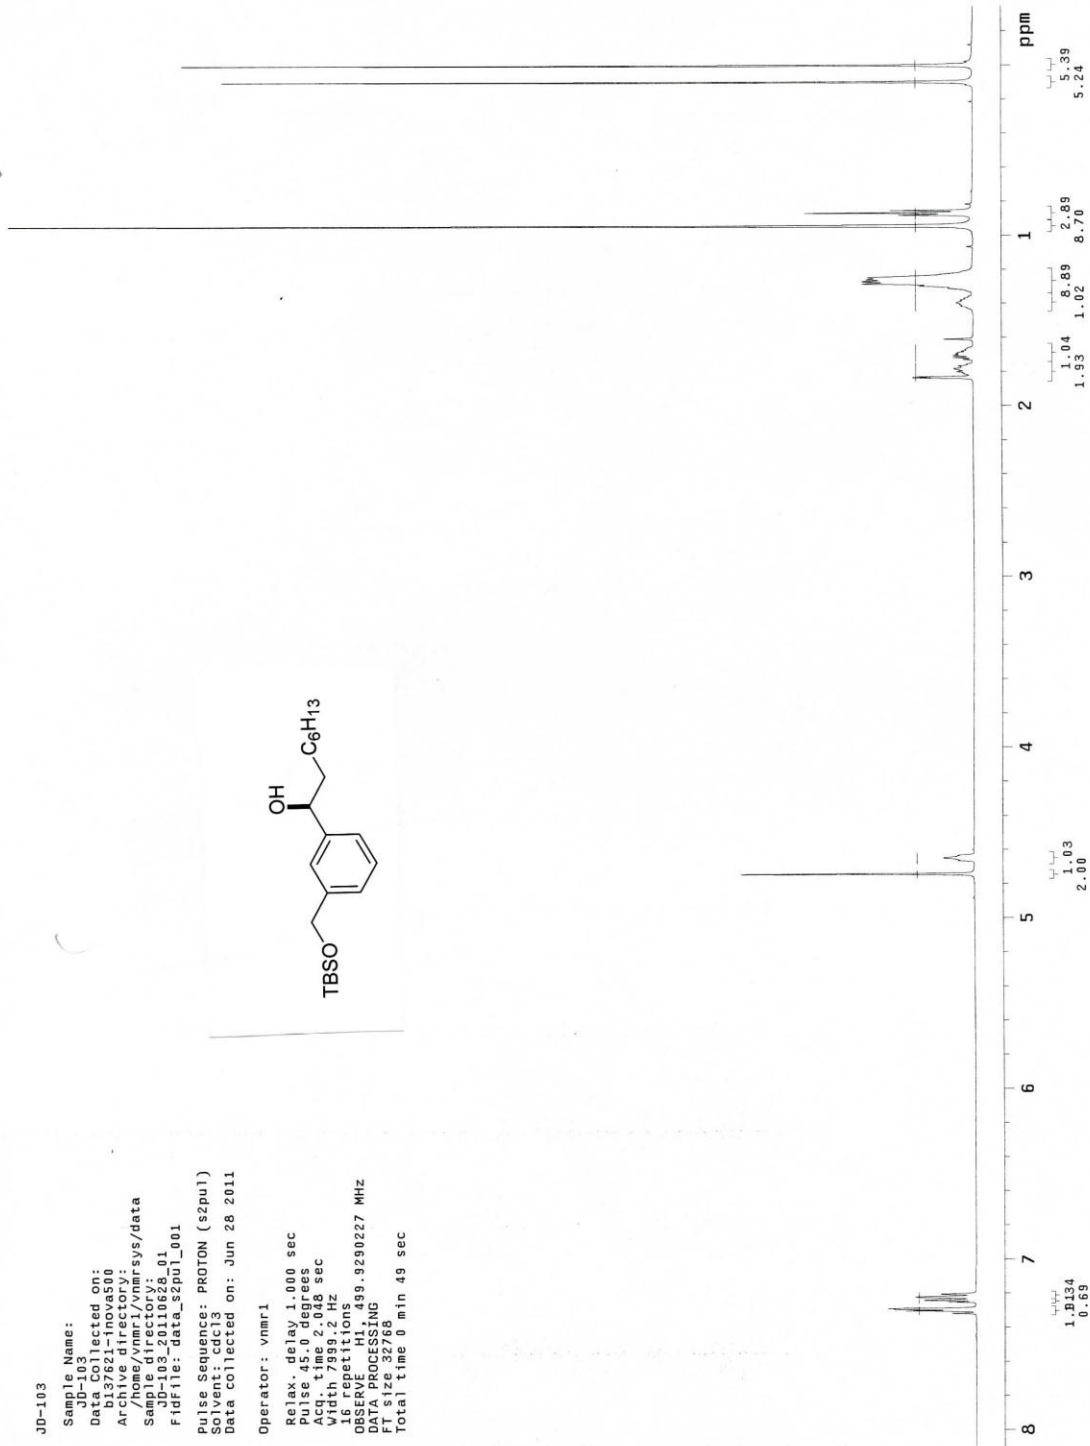

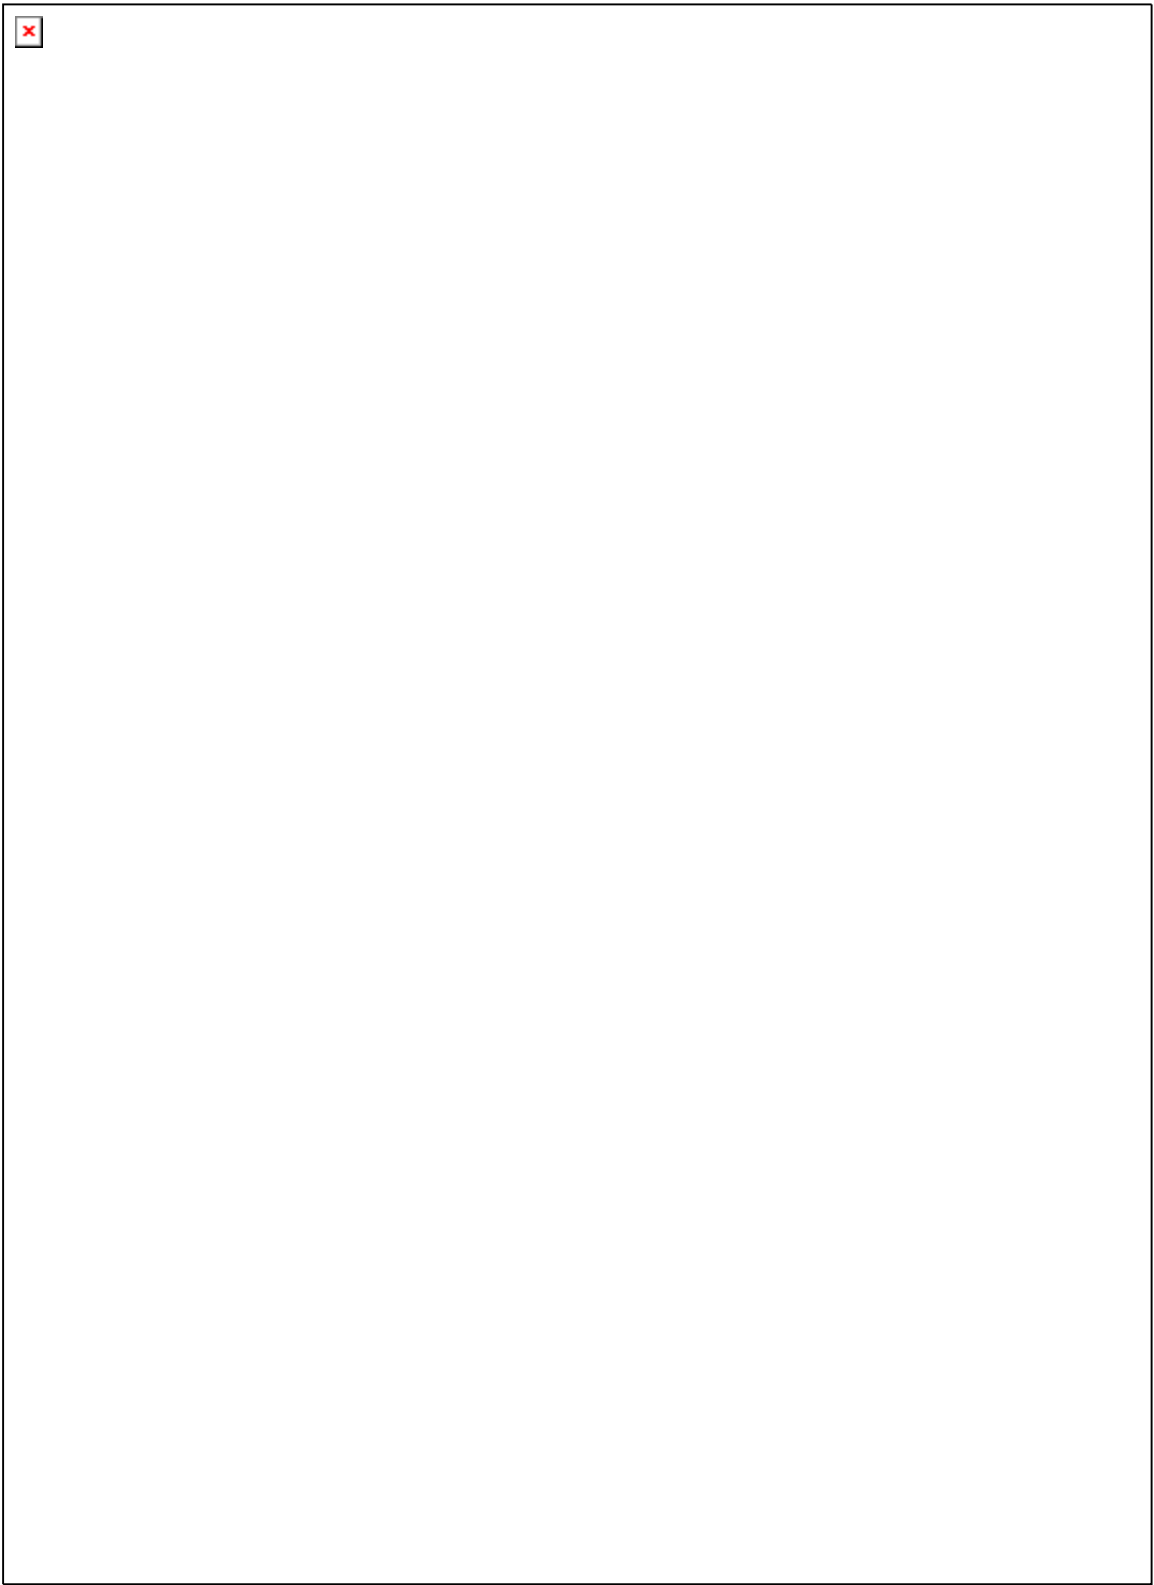

JD-94

Sample Name:  
JD-94  
Data Collected on:  
b137621-inova500  
Archive directory:  
sys\data  
Sample Name:  
JD-94.20110618\_01  
FidFile: data\_s2pul\_001

Pulse Sequence: PROTON (s2pul)  
Solvent: tdc13  
Data Collected on: Jun 18 2011

Operator: vmr1

Relax. delay 1.000 sec  
Pulse 45.0 degrees  
Acq. time 2.048 sec  
Width 7999.2 Hz  
16 repetitions  
DATA ACQUISITION: 99.9290184 MHz  
DATA PROCESSING  
FT size 32768  
Total time 0 min 49 sec

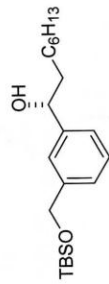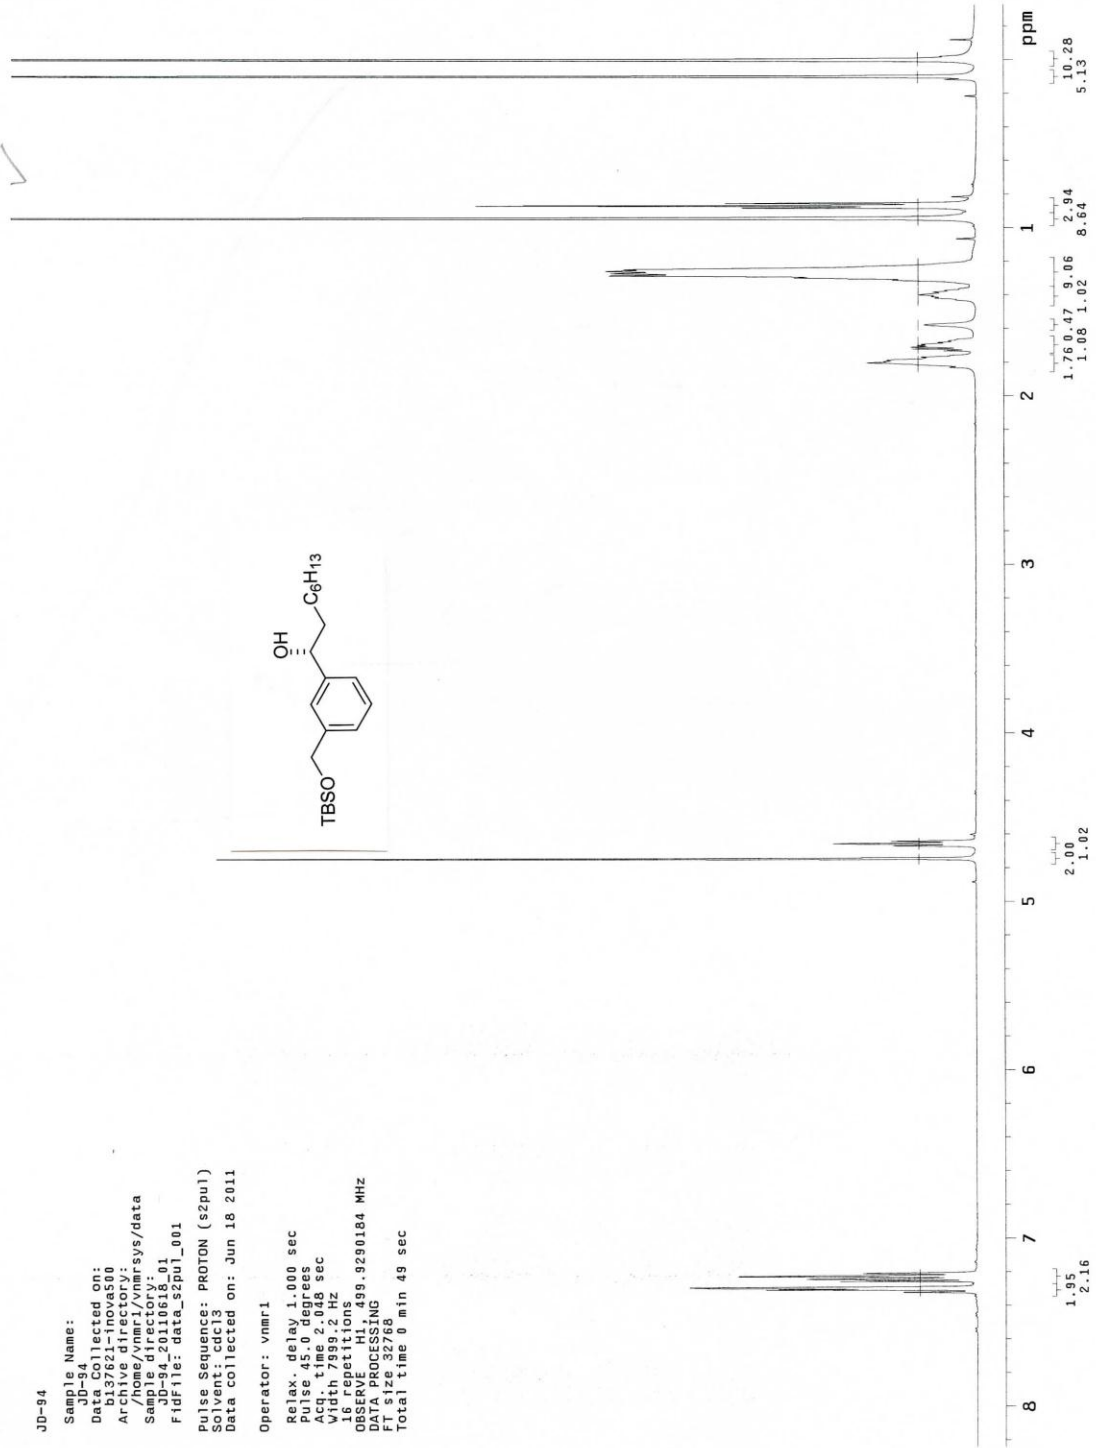



STANDARD CARBON PARAMETERS

Sample Name: JD-94-13c

Data Collected on:  
b137621-inova500  
Archive directory:

Sample directory:

FidFile: CARBON

Pulse Sequence: CARBON (s2pul)  
Solvent: cdcl3  
Data collected on: Jun 18 2011

Temp. 25.7 C / 298.9 K

Operator: vmmr1

Relax. delay 1.000 sec

Pulse 45.0 degrees

Acq. time 1.043 sec

Width 31421.8 Hz

NS 32

DS 2

SWH 7072491 MHZ

DECOUPLE CH1, 459.9315079 MHZ

Power 36 dB

continuously on

WALTZ-16 modulated

DATA PROCESSING

Line broadening 0.5 Hz

F2 - 8335

Total time 36 hr, 59 min

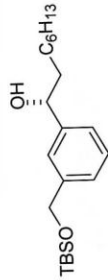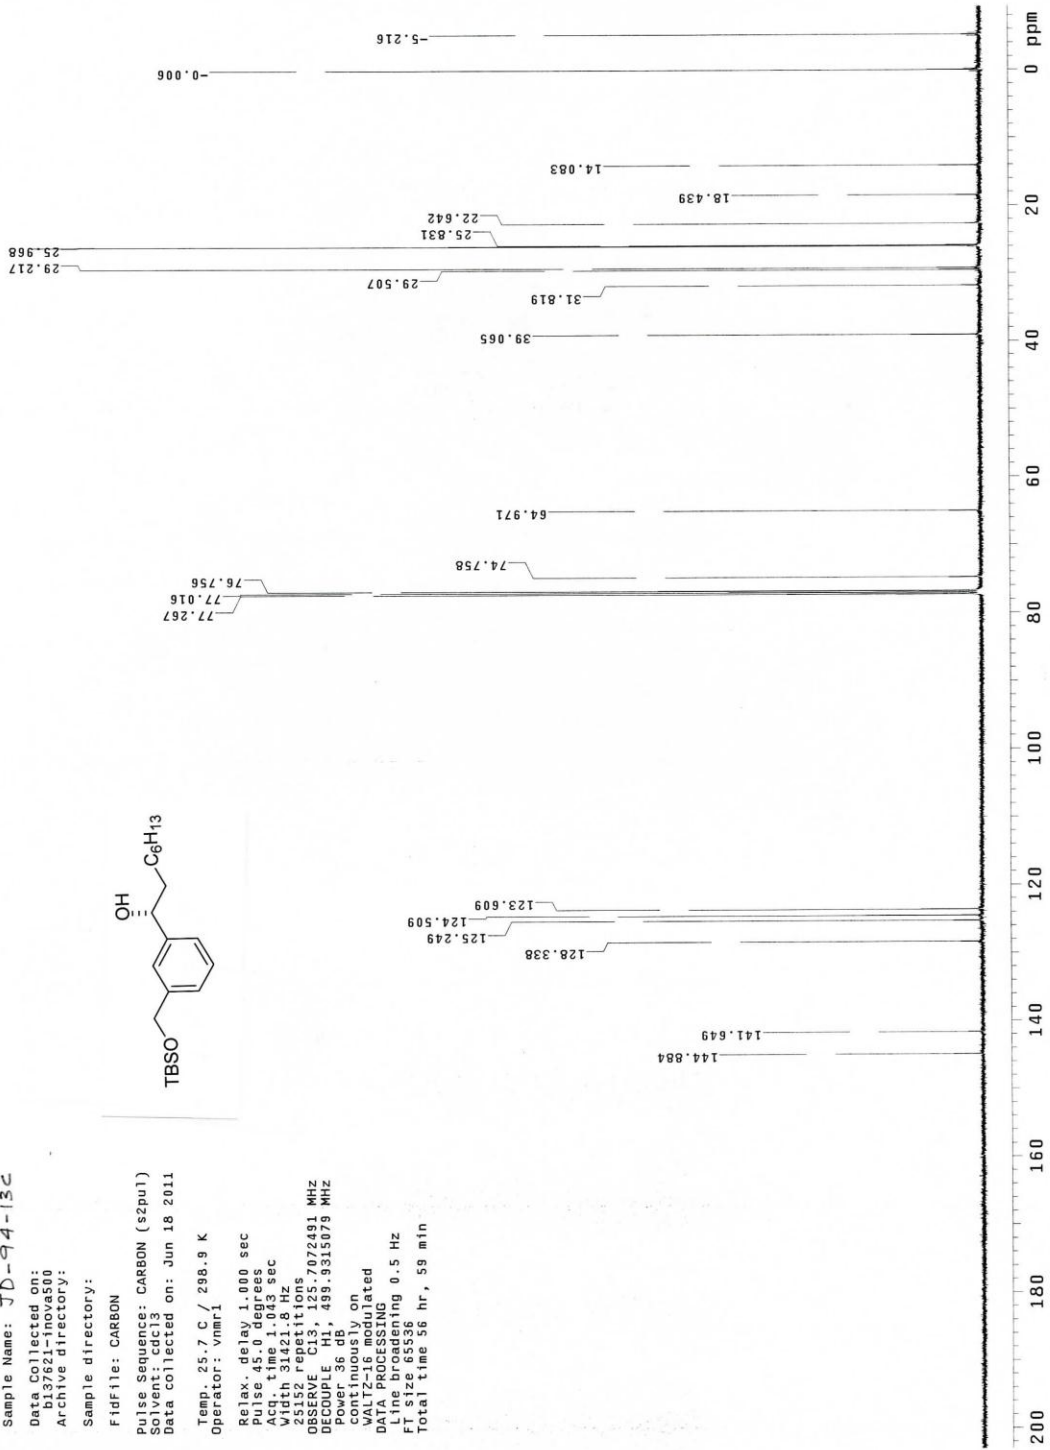

JD-108

Sample Name:  
JD-108  
Data collected on:  
6/30/2011 10:50:50  
Archive directory:  
/home/vnmr1/vmarsys/data  
Sample directory:  
JD-108\_20110630\_01  
FID file: data\_s2p01\_001  
Pulse Sequence: PROTON (s2p01)  
Solvent: cdcl3  
Data collected on: Jun 30 2011

Operator: vnmr1

Relax. delay 1.000 sec  
Acq. time 2.000 sec  
Acq. time 2.000 sec  
Width 7899.2 Hz  
16 repetitions  
OBSERVE H1, 499.9290193 MHz  
DATA PROCESSING  
FT size 32768  
Total time 0 min 49 sec

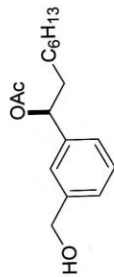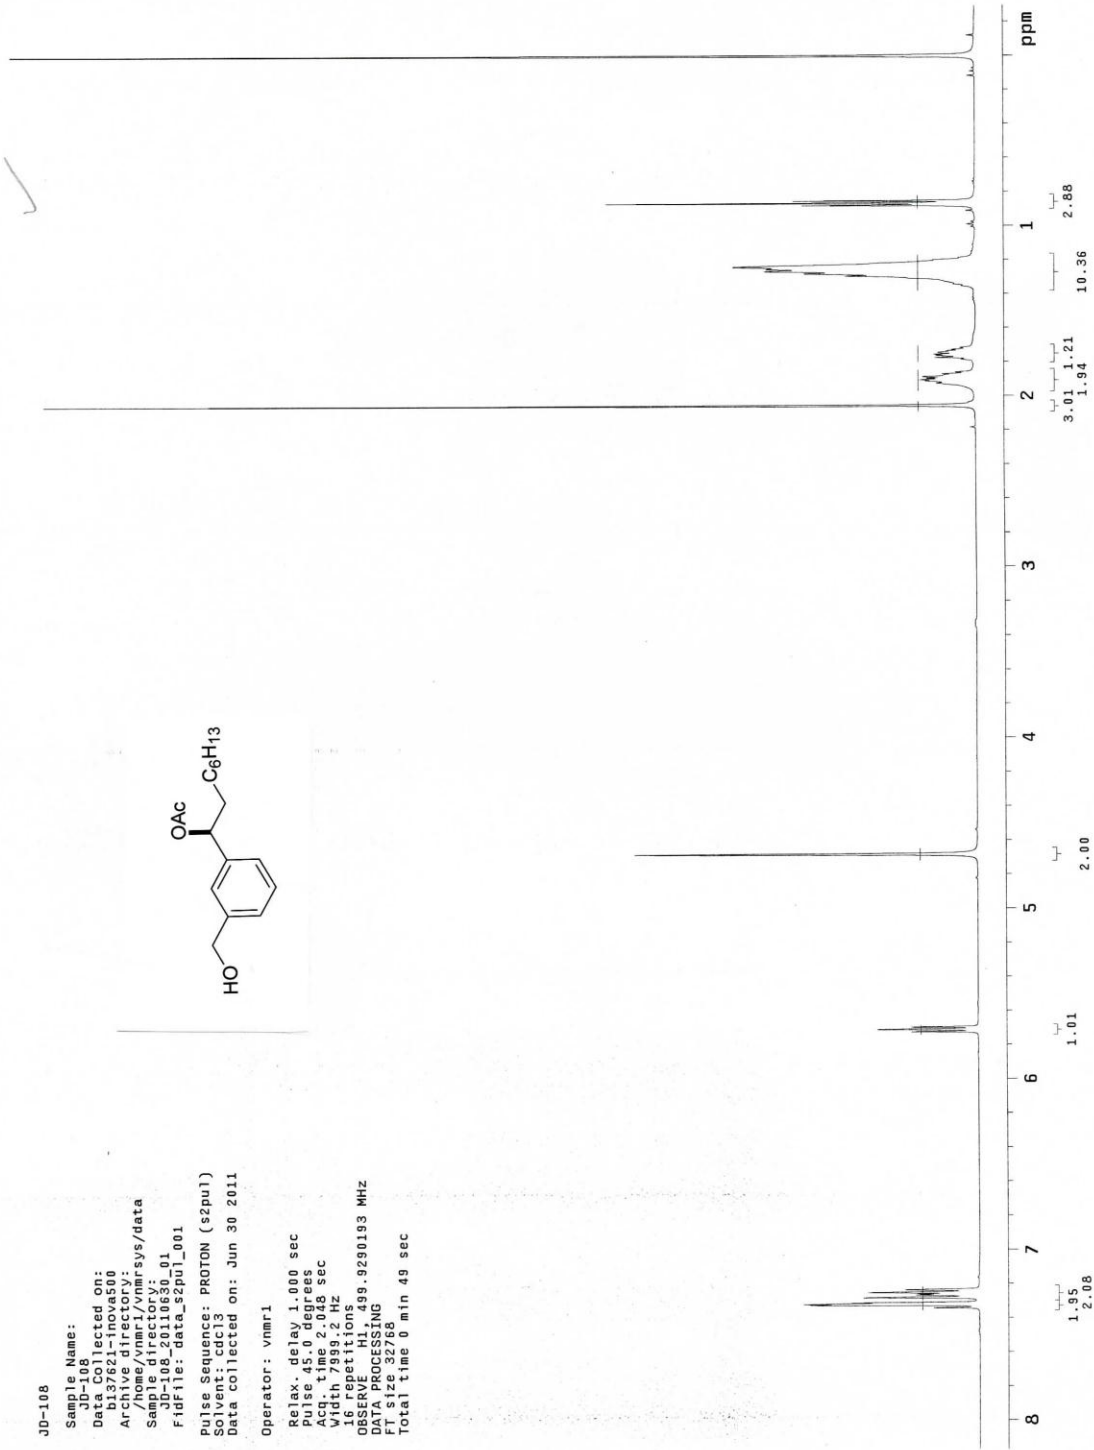

STANDARD CARBON PARAMETERS

Sample Name:  
Data Collected on:  
Archive directory:  
Sample directory:  
FidFile: CARBON  
Pulse Sequence: CARBON (s2pu1)  
Solvent: cdcl3  
Data collected on: Jun 30 2011  
Temp. 24.6 C / 297.8 K  
Operator: vnmr1  
Relax. delay 1.000 sec  
Pulse time 1.000 sec  
Acq time 1.000 sec  
Width 31421.8 Hz  
25216 repetitions  
OBSERVE C13, 125.7072491 MHz  
DECOUPLE H1, 499.9315079 MHz  
Power 36 dB  
PULPROG zgpg30  
CMT1 uniformly on  
CMT2 modulated  
DATA PROCESSING  
Line broadening 0.5 Hz  
FT size 65536  
Total time 56 hr, 59 min

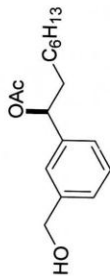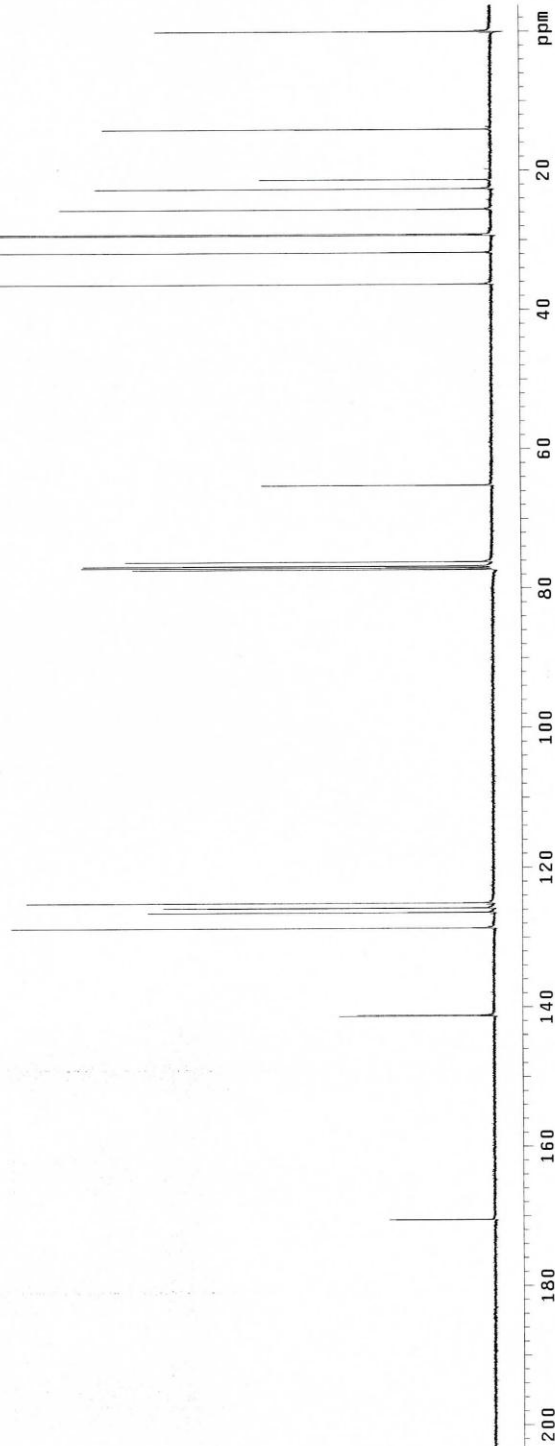

JD-106

Sample Name: JD-106  
Date Collected on: 20110629  
Data Collected on: 20110629  
Archive directory: /home/vnmr1/vmr/sys/data  
Sample directory: JD-106\_20110629\_01  
FidFile: data\_s2pu\_001

Pulse Sequence: PROTON (s2pu1)  
Solvent: cdcl3  
Data collected on: Jun 29 2011

Operator: vnmr1

Relax. delay 1.000 sec  
Pulse 45.0 degrees  
Acq. time 2.048 sec  
F1 F2 F3  
16 repetitions  
OBSERVE H1, 499.9290193 MHZ  
DATA PROCESSING  
FT size 32768  
Total time 0 min 49 sec

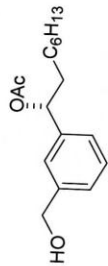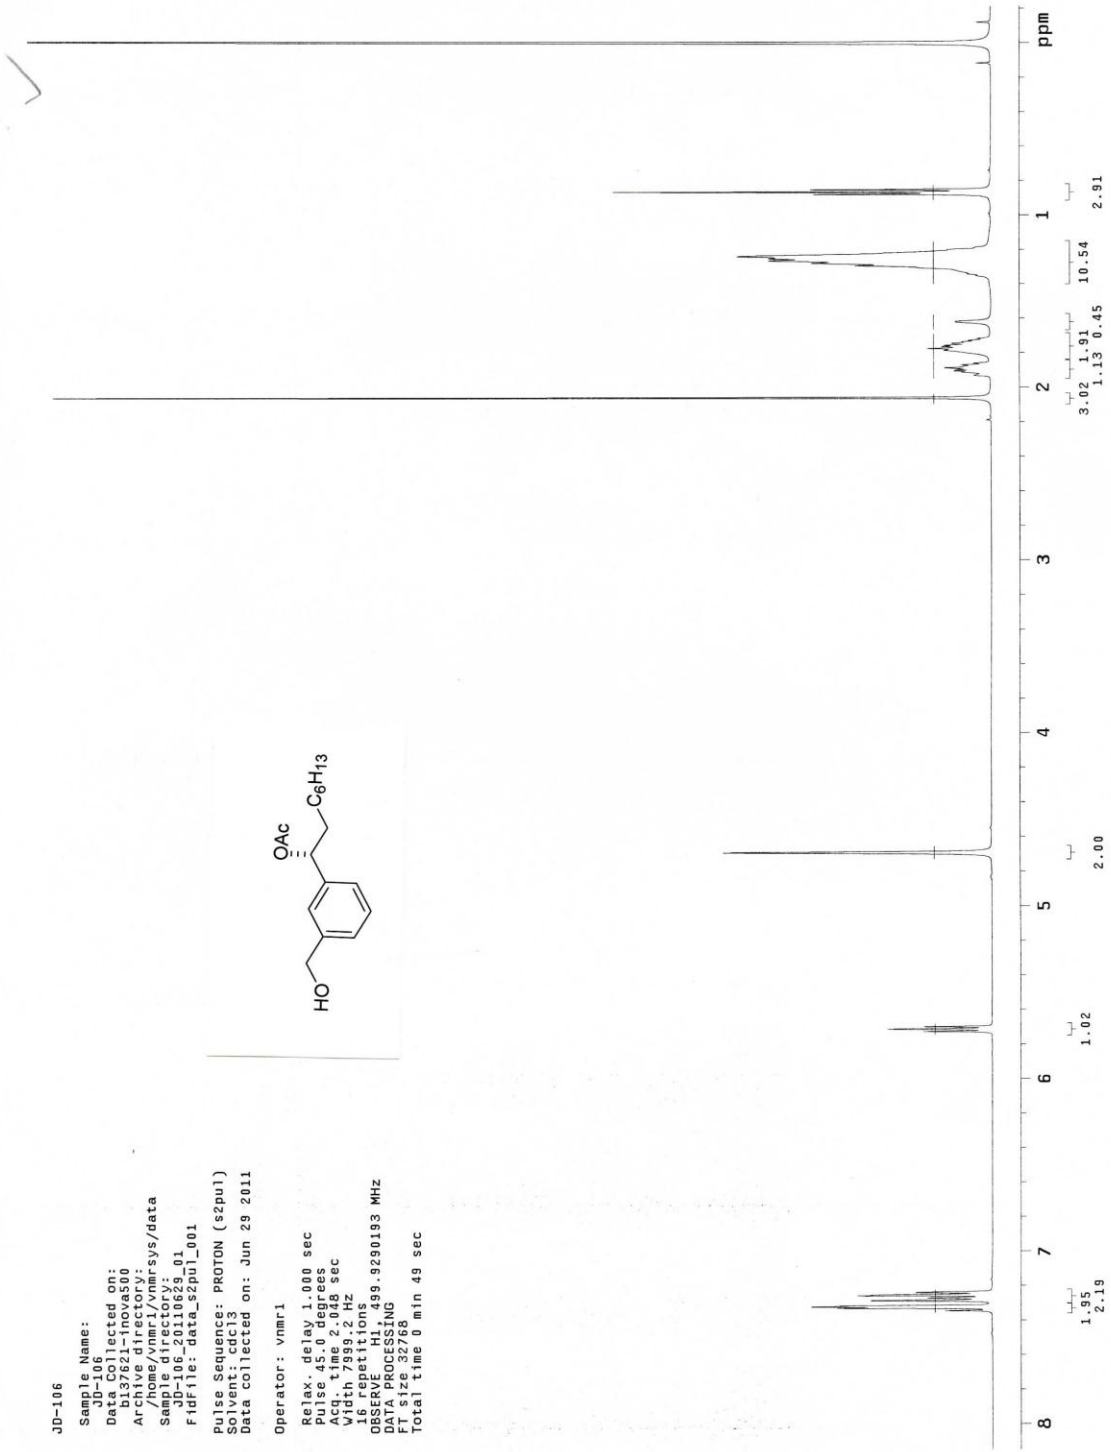

30-103-13C → It should be JD-106-13C

Sample Name: JD-103-13C  
Data collected on: 6/3/02  
Acq: 3me21-inova500  
Dir: /home/vnmr1/vnmr/sys/data  
Sample directory: JD-103-13C.20110629\_01  
Fidfile: CARBON

Pulse Sequence: CARBON (s2pul)  
Solvent: cdcl3  
Data collected on: Jun 29 2011

Temp.: 24.8 C / 297.9 K  
Operator: vnmr1

Relax. delay 1.000 sec  
Pulse 45.0 degrees  
Acq. time 1.043 sec  
Sweep 4544  
4544 repetitions  
OBSERVE C13, 125.7072491 MHz  
DECOUPLE H1, 499.9315079 MHz  
Power 36 dB  
continuously on  
VALZEB modulated  
Line broadening 0.5 Hz  
FT size 65536  
Total time 2 hr, 50 min

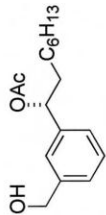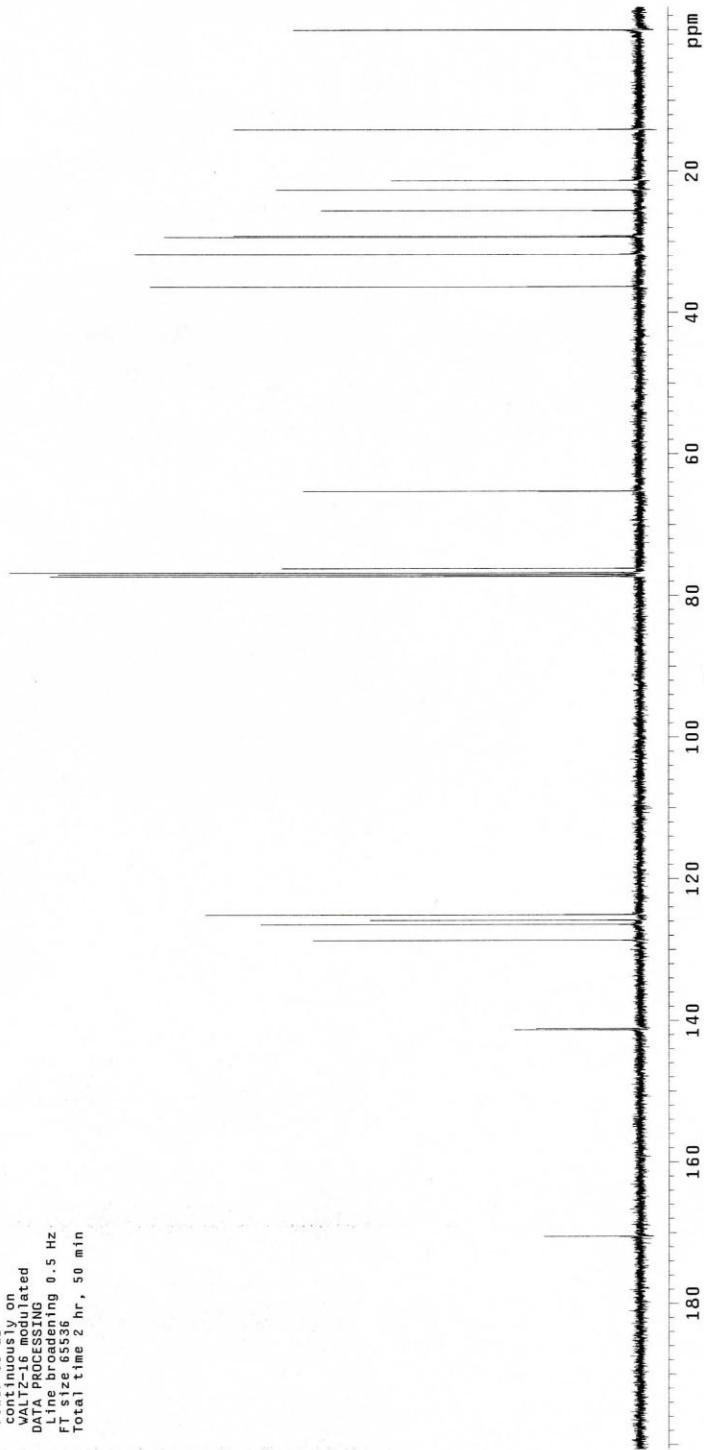

JD-110  
Sample Name:  
JD-110 collected on:  
Date: 07/02/11  
bi32621-inova500  
Archive directory:  
/home/vnmr1/vmarsys/data  
Sample directory:  
JD-110\_20110702\_01  
FID file: data\_scpur\_001  
Pulse Sequence: PROTON (s2pul)  
Solvent: cdcl3  
Data collected on: Jul 2 2011

Operator: vnmr1  
Relax. delay 1.000 sec  
Pulse time 2.000 sec  
Acq. time 2.000 sec  
Width 7999.2 Hz  
16 repetitions  
OBSERVE HI, 499.9290193 MHz  
DATA PROCESSING  
FT size 32788  
Total time 0 min 49 sec

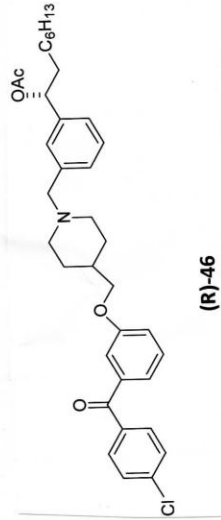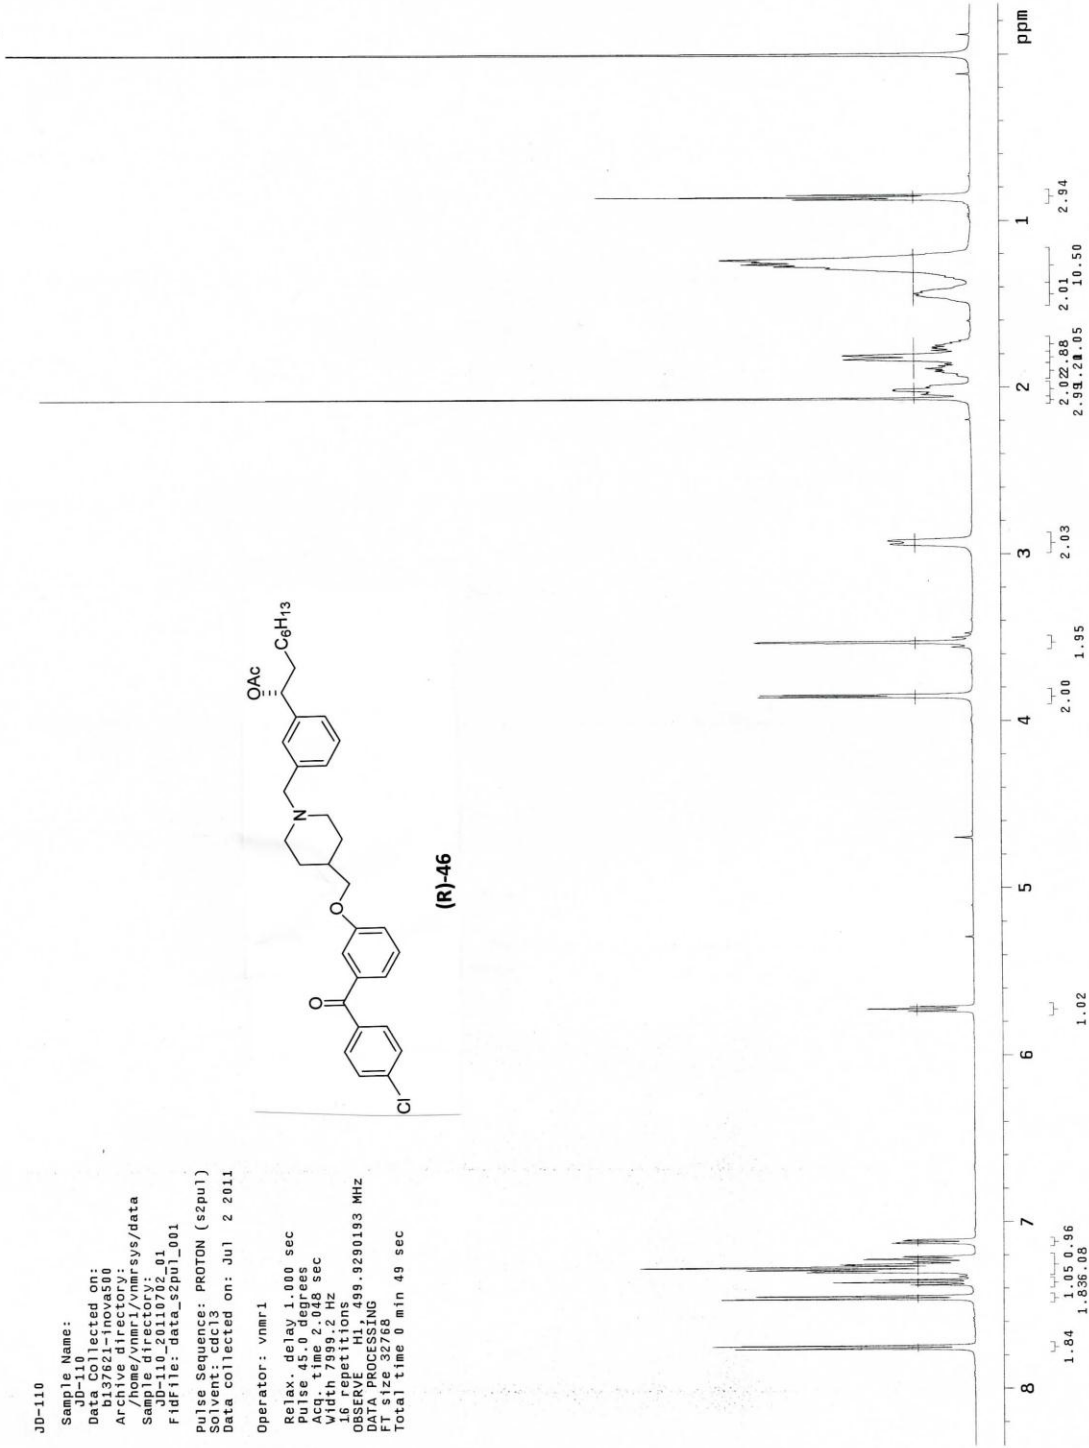

STANDARD CARBON PARAMETERS

Sample Name:  
Data Collected on:  
Archive directory:  
Sample directory:  
FidFile: CARBON  
Pulse Sequence: CARBON (s2pul)  
Solvent: cdcl3  
Data collected on: Jul 2 2011  
Temp. 24.8 C / 297.9 K  
Operator: vnmr1  
Relax. delay 1.000 sec  
Pulse 45.0 degrees  
Acq. time 1.043 sec  
Width 31421.8 Hz  
23232 repetitions  
OBSERVE C13, 125.7072491 MHZ  
DECOUPLE H1, 499.9315079 MHZ  
CONTINUOUSLY on  
WALTZ-16 modulated  
DATA PROCESSING  
Line broadening 0.5 Hz  
FT size 65536  
Total time 56 hr, 59 min

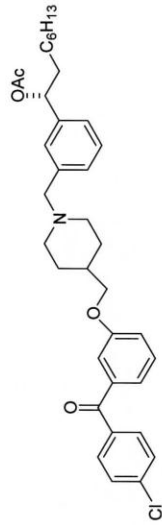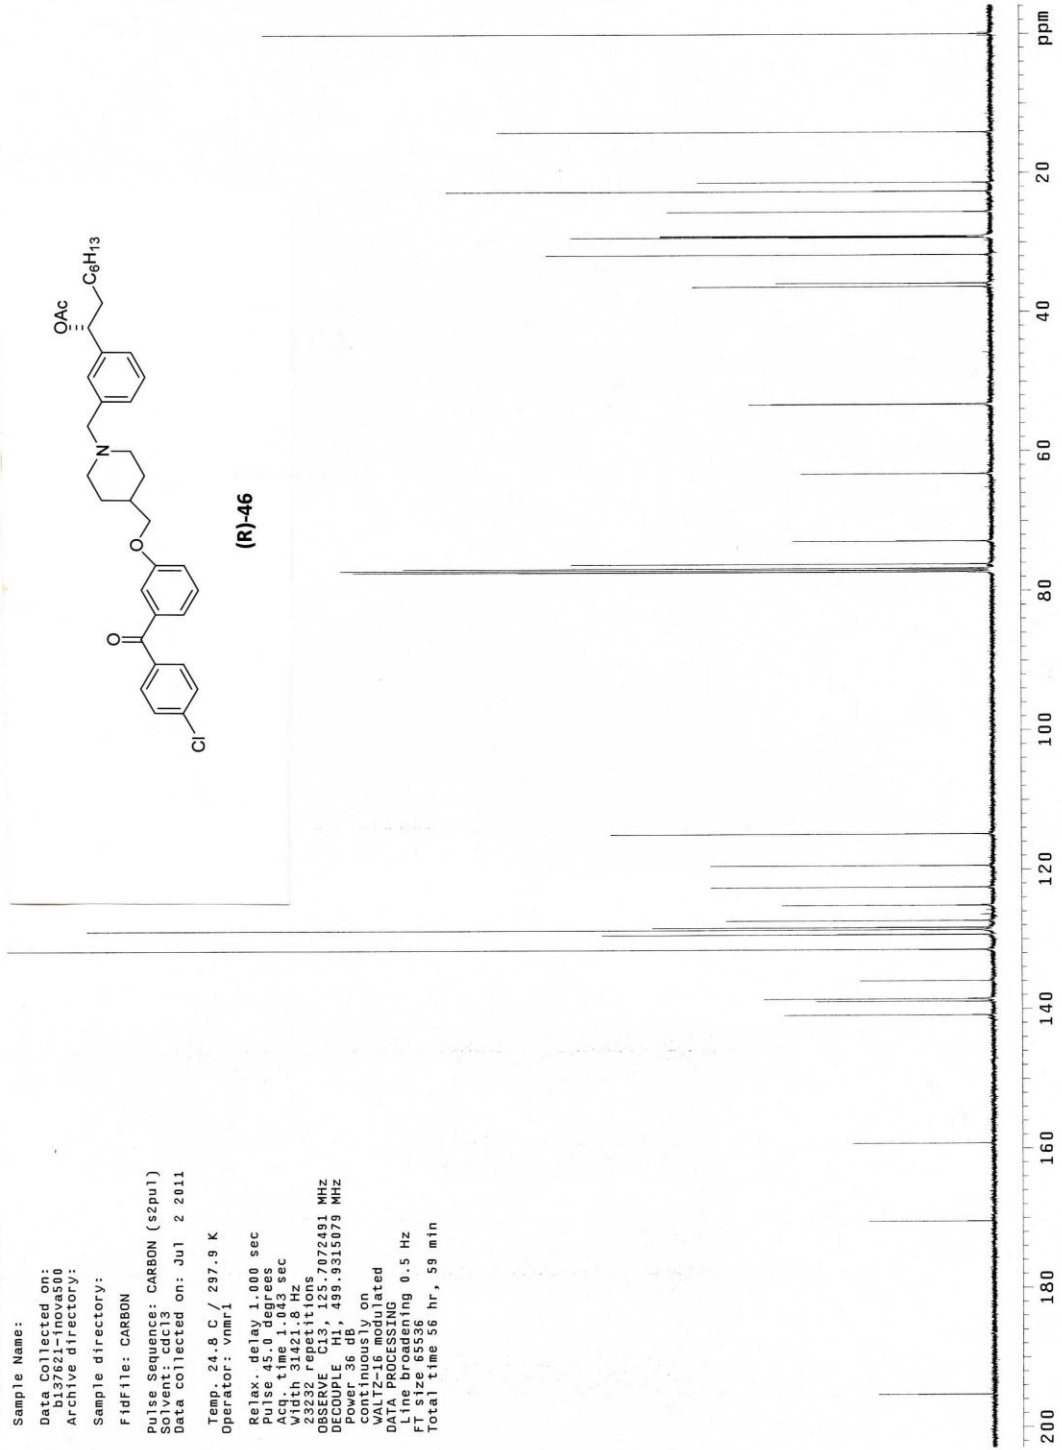

JD-117

Sample Name:  
JD-117  
Data Collected on:  
bi37621-inova500  
Archive directory:  
Sample directory: sys/data  
JD-117\_20110709\_01  
Fid file: data\_s2pul\_001  
Pulse Sequence: PROTON (s2pul)  
Solvent: cdcl3  
Data Collected on: Jul 9 2011

Operator: vmmr1  
Relax. delay 1.000 sec  
Pulse 45.0 degrees  
Acq. time 2.048 sec  
Width 7999.2 Hz  
32 repetitions  
AQ 0.9290184  
RG 128  
DATA PROCESSING  
FT size 32788  
Total time 1 min 38 sec

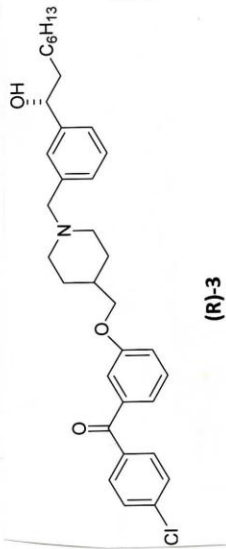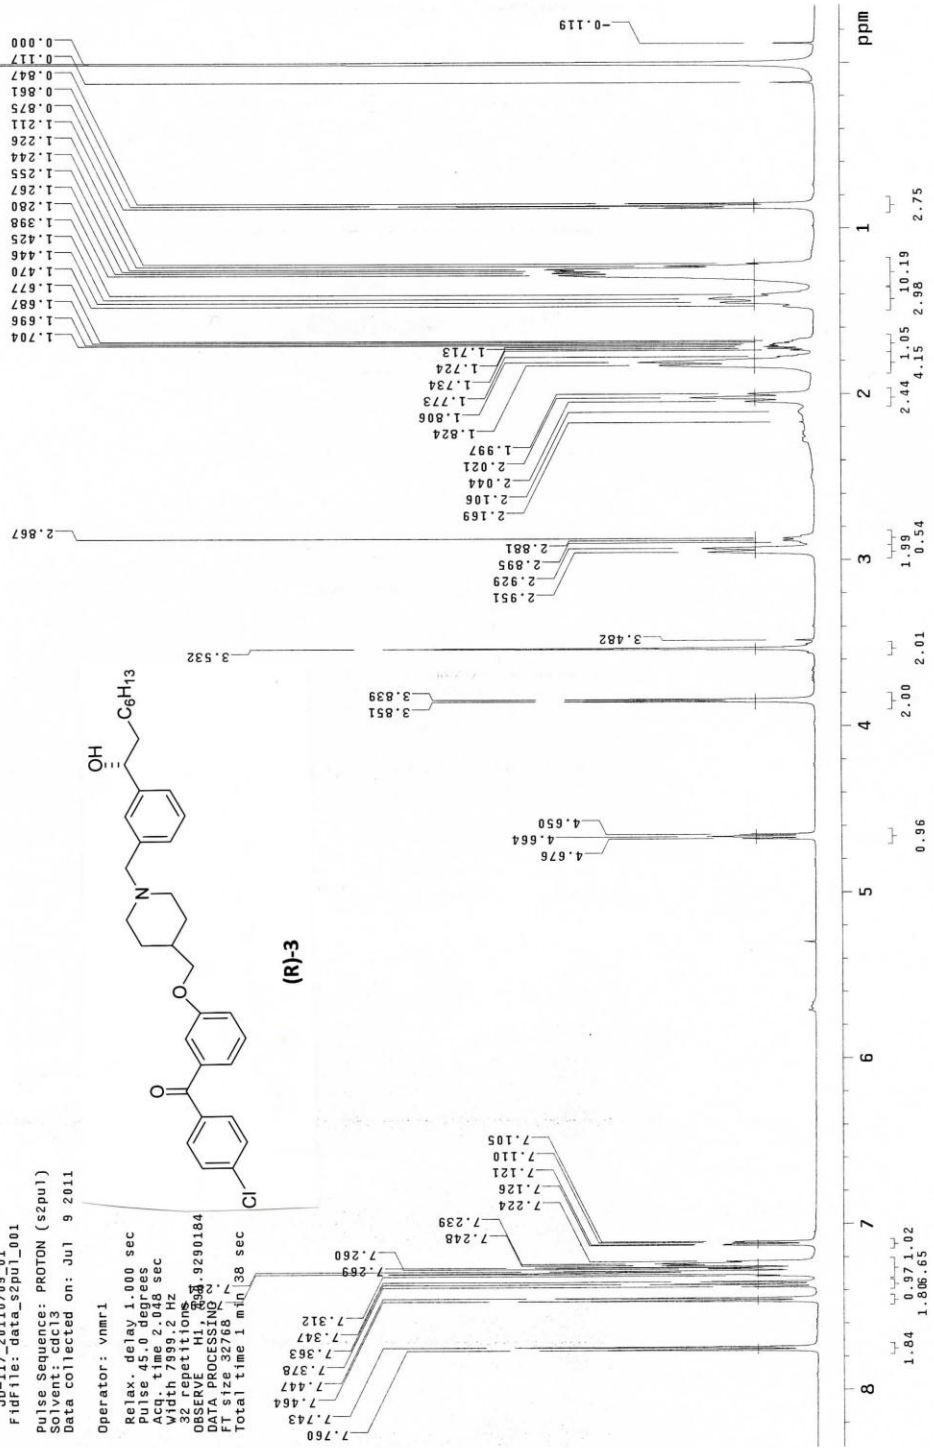



STANDARD CARBON PARAMETERS

Sample Name: JD-117-13C

Data Collected on:  
b137621-inova500

Archive directory:

Sample directory:

FidFile: CARBON

Pulse Sequence: CARBON (s2pul)

Solvent: cdcl3

Data Collected on: Jul 9 2011

Temp: 24.5 C / 297.6 K

Operator: vmmr1

Relax. delay 1.000 sec

Pulse 45.0 degrees

Acq. time 1.043 sec

Width 31421.8 Hz

Resolution 3.01 Hz

Observed C13, 125.7072491 MHz

Decouple H1, 499.9315079 MHz

Power 36 dB

continuously on

WALTZ-16 modulated

DATA PROCESSING

File Processing 0.5 Hz

File Processing 0.5 Hz

Total time 56 hr, 59 min

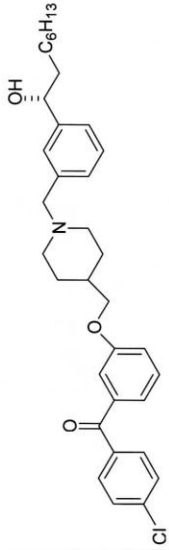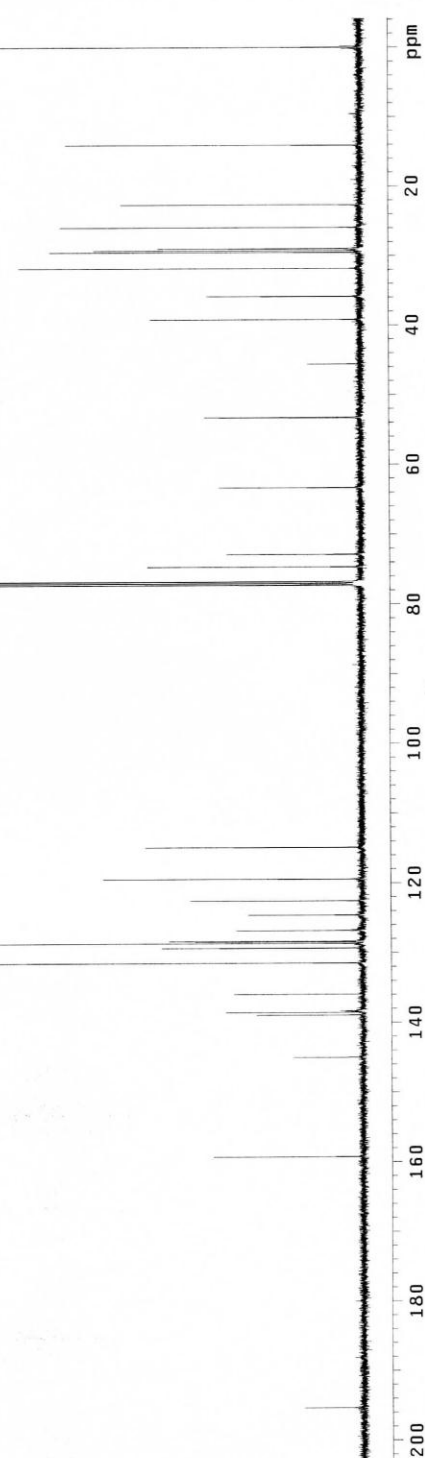

## ==== Shimadzu LabSolutions Analysis Report ====

C:\LabSolutions\Data\Project1\Joy Data\HPLC-Compound\Sample-22.lcd  
 Acquired by : System Administrator  
 Sample Name : JD-07-16-2011  
 Sample ID :  
 Tray# : 1  
 Vial# : 1  
 Injection Volume : 1  
 Data File : C:\LabSolutions\Data\Project1\Joy Data\HPLC-Compound\Sample-22.lcd  
 Method File : C:\LabSolutions\Data\Project1\Joy training\Mixture-235nm-62%ACN.lcm  
 Report Format File : C:\LabSolutions\System\DEFAULT.lsr  
 Month-Day Acquired : 10/5/2011  
 Month-Day Processed : 10/5/2011

### <Chromatogram>

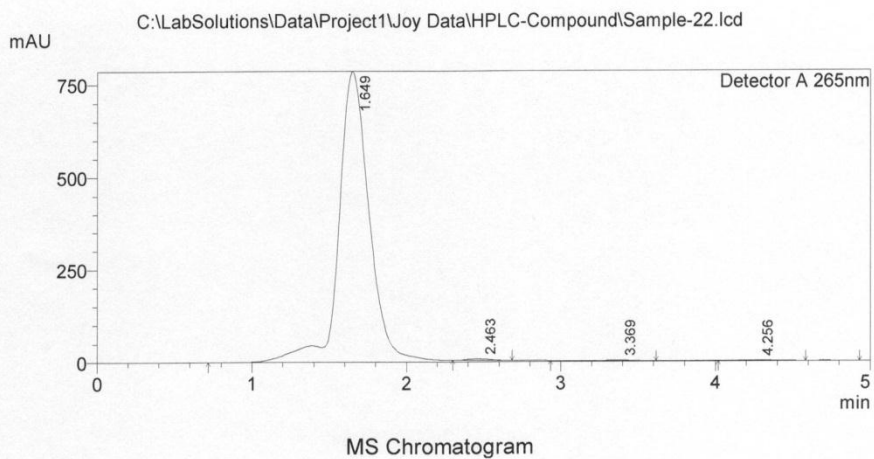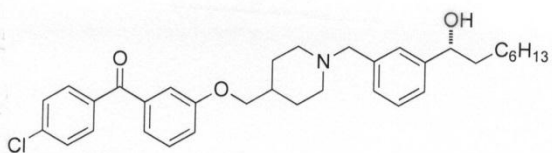

Column: Phenomenex kinetex 2.6 $\mu$  C18 100A, 100 x 4.60 mm  
 Solvent: CH<sub>3</sub>CN/0.05%TFA in H<sub>2</sub>O = 25/1  
 flow rate: 0.5 mL/min.

C:\LabSolutions\Data\Project1\Joy Data\HPLC-Compound\Sample-22.lcd

JD-119

Sample Name: JD-119  
Data Collected on: b137621-inova500  
Acq. time: 20110711\_01  
/home/vnmr1/omr/sys/data  
Sample directory: JD-119\_20110711\_01  
Fid file: data\_s2pul\_001

Pulse Sequence: PROTON (s2pul)  
Solvent: cdcl3  
Data collected on: Jul 11 2011

Operator: vnmr1

Relax. delay 1.000 sec  
Pulse 45.0 degrees  
Acq. time 2.048 sec  
Width 7999.2 Hz  
Spectral width 32768 Hz  
Observed F1 499.9290188 MHz  
DATA PROCESSING  
FT size 32768  
Total time 1 min 38 sec

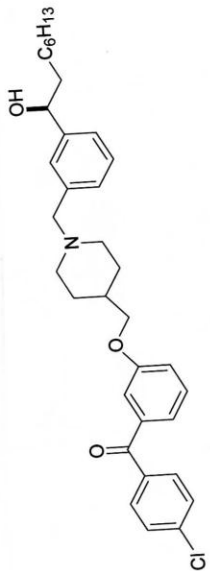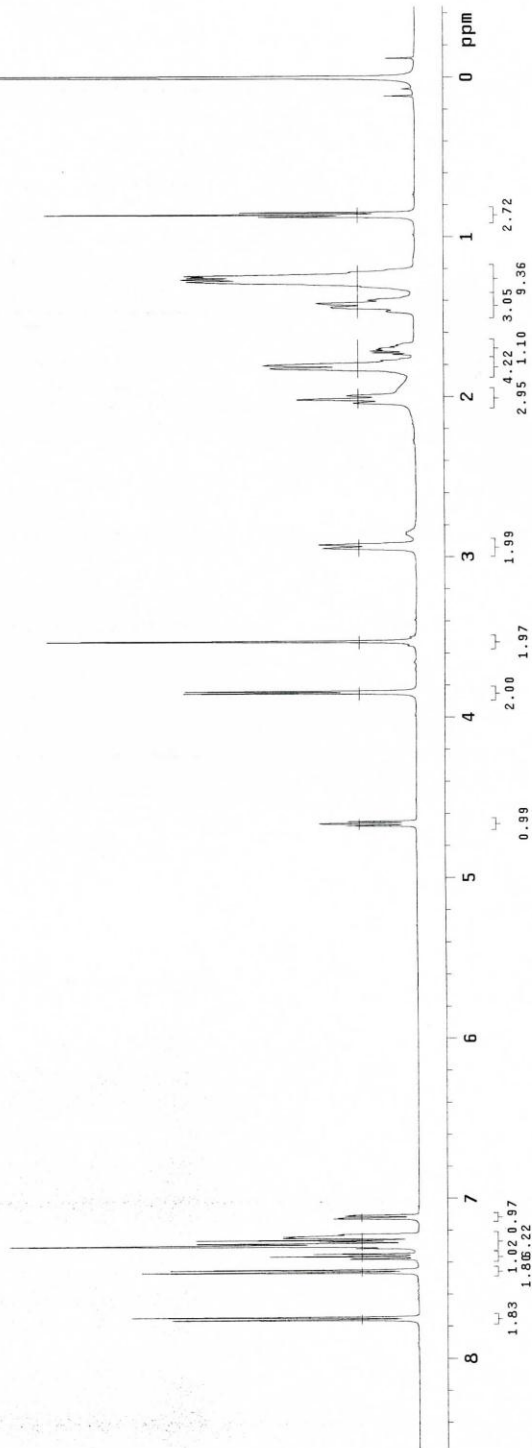

STANDARD CARBON PARAMETERS

Sample Name: JD-119-12C

Data Collected on: 11/3/2011 16:50

Archive directory:

Sample directory:

FidFile: CARBON

Pulse Sequence: CARBON (szpu1)

Solvent: cdcl3

Data collected on: Jul 11 2011

Temp: 24.8 C / 297.9 K

Operator: vnmr1

Relax. delay 1.000 sec

Acq. time 1.045 sec

Width 31421.8 Hz

25984 repetitions

OBSERVE C13, 125.7072491 MHZ

DECOUPLE H1, 499.9315079 MHZ

Power 36 dB

on

WALTZ-16 modulated

DATA PROCESSING

Line broadening 0.5 Hz

FT size 65536

Total time 56 hr, 59 min

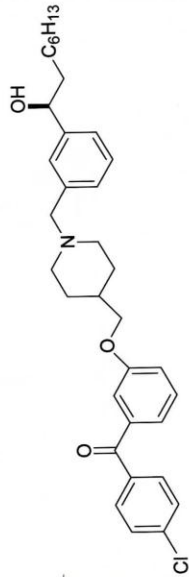

(S)-3

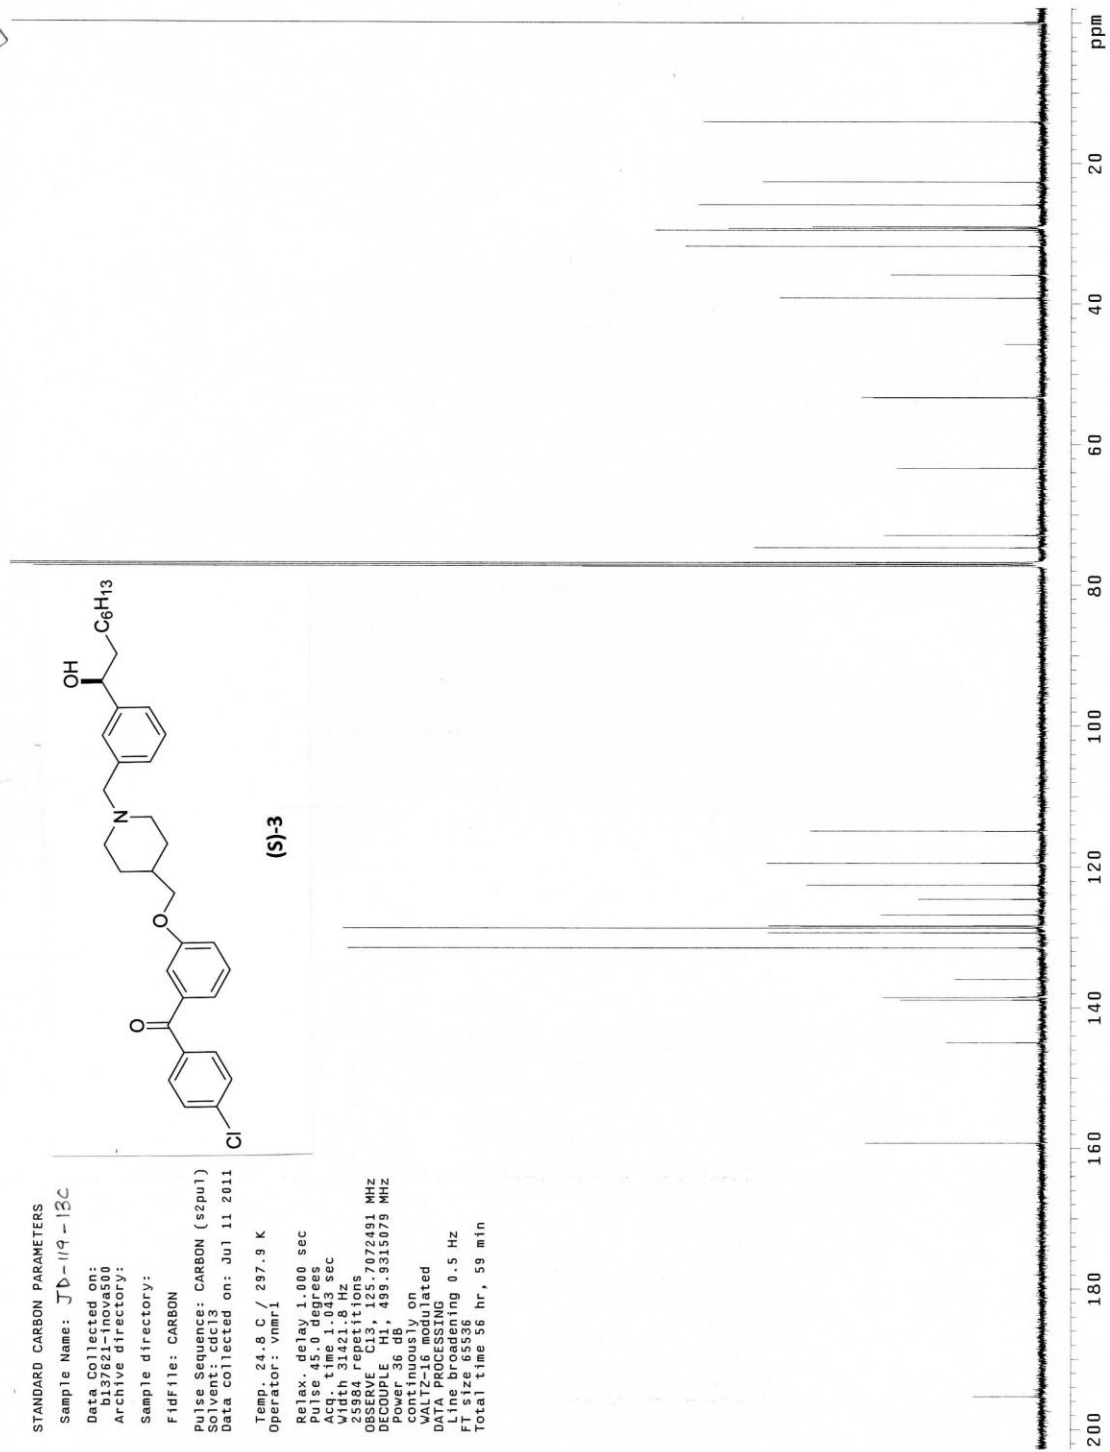

## ==== Shimadzu LabSolutions Analysis Report ====

C:\LabSolutions\Data\Project1\Joy Data\HPLC-Compound\Sample-21.lcd  
Acquired by : System Administrator  
Sample Name : JD-07-16-2011  
Sample ID :  
Tray# : 1  
Vial# : 1  
Injection Volume : 1  
Data File : C:\LabSolutions\Data\Project1\Joy Data\HPLC-Compound\Sample-21.lcd  
Method File : C:\LabSolutions\Data\Project1\Joy training\Mixture-235nm-62%ACN.lcm  
Report Format File : C:\LabSolutions\System\DEFAULT.lsr  
Month-Day Acquired : 10/5/2011  
Month-Day Processed : 10/5/2011

## &lt;Chromatogram&gt;

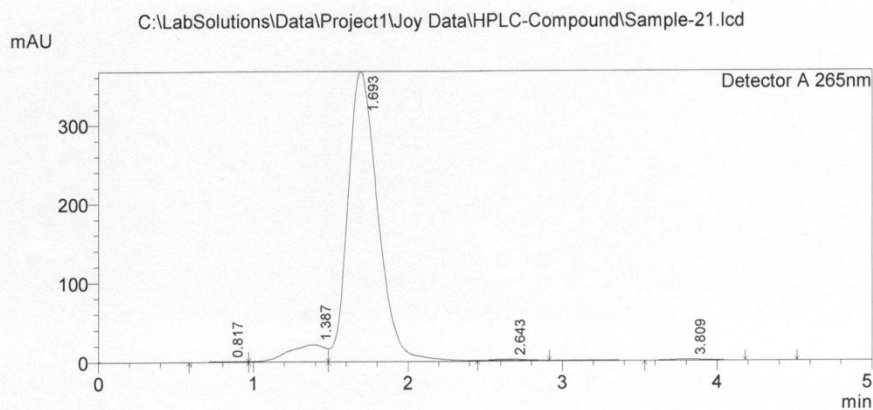

MS Chromatogram

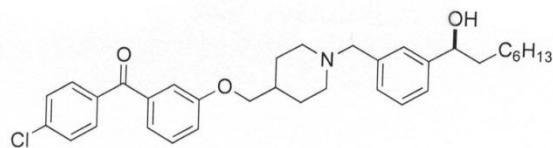

Column: Phenomenex kinetex 2.6 $\mu$  C-18 100A, 100 x 4.60 mm  
Solvent: CH<sub>3</sub>CN/0.05%TFA in H<sub>2</sub>O = 25/1  
flow rate: 0.5 mL/min.

C:\LabSolutions\Data\Project1\Joy Data\HPLC-Compound\Sample-21.lcd

JD-122  
 Sample Name:  
 JD-122  
 Data Collected on:  
 bl37621-inova500  
 Archive directory:  
 /home/vnmr1/vnmr5ys/data  
 Sca  
 JD-122\_20110717\_01  
 FIDFile: data\_s2p01\_001  
 Pulse Sequence: PRGTON (s2pul)  
 Solvent: cdcl3  
 Data collected on: Jul 17 2011  
 Operator: vnmr1  
 Relax. delay 1.000 sec  
 Pulse 45.0 degrees  
 Acq. time 2.048 sec  
 Width 7899.2 Hz  
 32 Repetitions  
 OBSERVED F1 F2  
 DUMPING  
 FT size 32768  
 Total time 1 min 38 sec

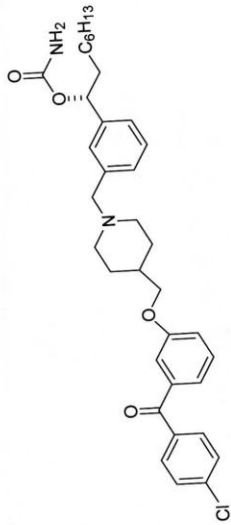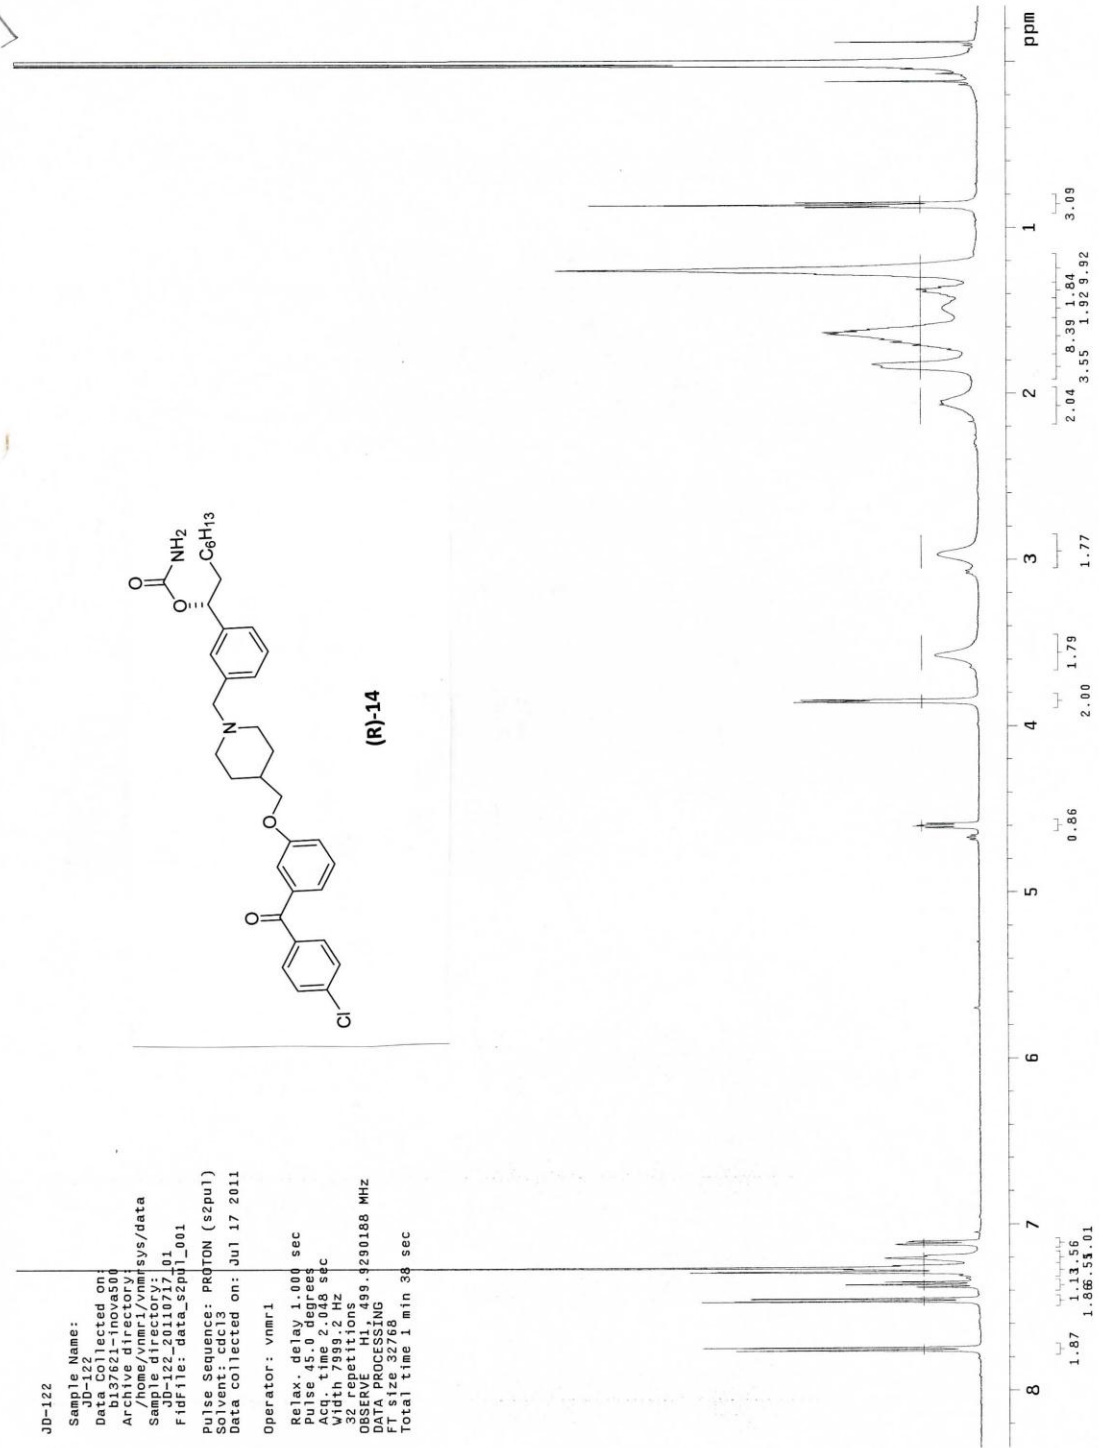

STANDARD CARBON PARAMETERS

Sample Name:  
Data Collected on: b137621-1nova500  
Archive directory:  
Sample directory:  
FidFile: CARBON  
Pulse Sequence: CARBON (s2pul)  
System: C13  
Data Collected on: Jul 17 2011  
Temp: 24.4 C / 297.6 K  
Operator: vnmr1  
Relax. delay 1.000 sec  
Pulse 45.0 degrees  
Acq. time 1.043 sec  
Sweep rate 125.0 Hz  
36556 Points  
OBSERVE C13, 125.7072491 MHZ  
DECOUPLE H1, 499.9315079 MHZ  
Power 36 dB  
continuously on  
VALTZ-16 modulated  
DATA PROCESSING  
Time consuming 0.5 Hz  
FT size 65536  
Total time 56 hr, 59 min

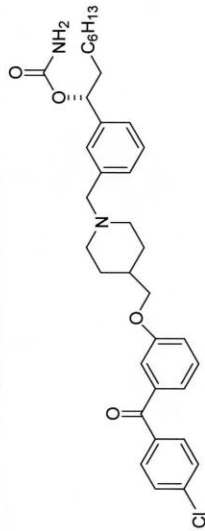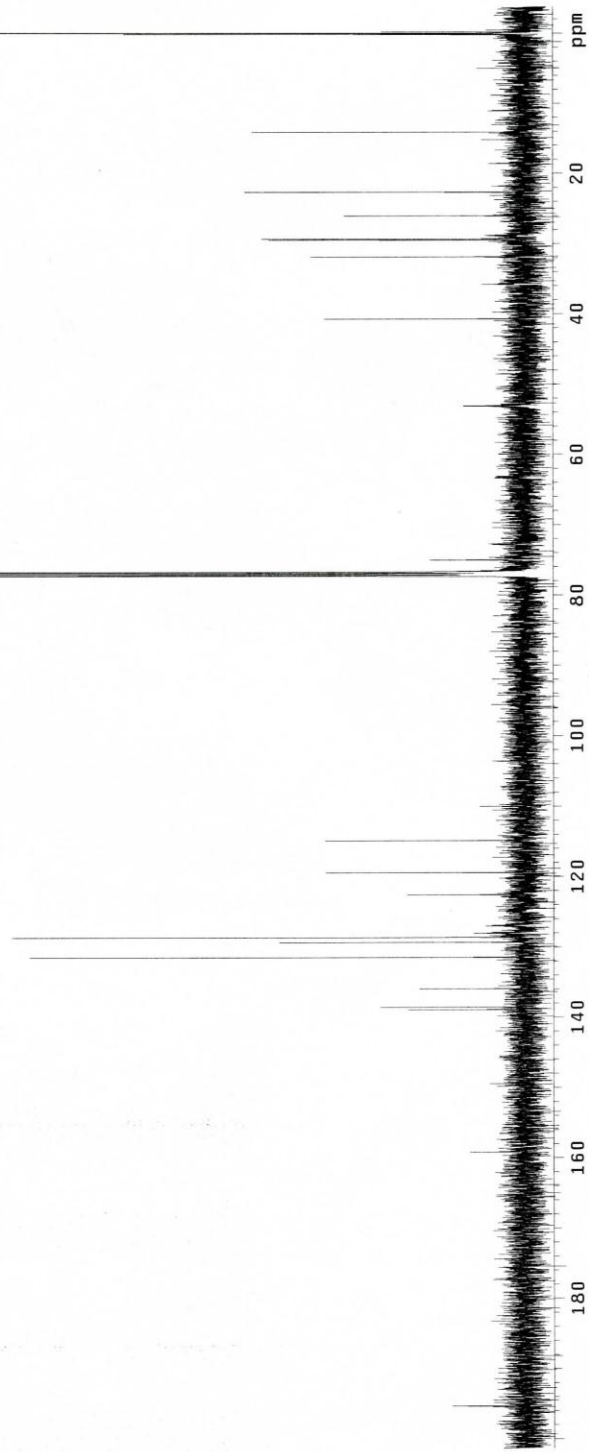

JD-123  
 Sample Name:  
 JD-123  
 Data Collected on:  
 b137621-inova500  
 Archive directory:  
 sys\data  
 Sample directory:  
 JD-123\_20110716\_01  
 FID file: data\_s2pul\_001  
 Pulse Sequence: PROTON (s2pul)  
 Spectroscopy:  
 Data Collected on: Jul 16 2011  
 Operator: vmmr1  
 Relax. delay 1.000 sec  
 Pulse 45.0 degrees  
 Acq. time 2.048 sec  
 Width 7999.2 Hz  
 OBSERVE: 1H  
 OBSERVEPULPROG: zgpg30  
 FT size 32768  
 Total time 1 min 38 sec

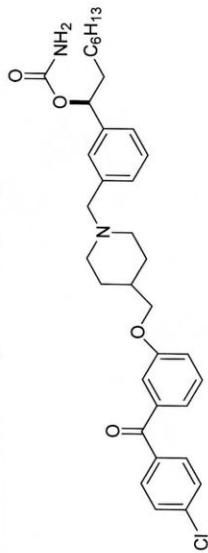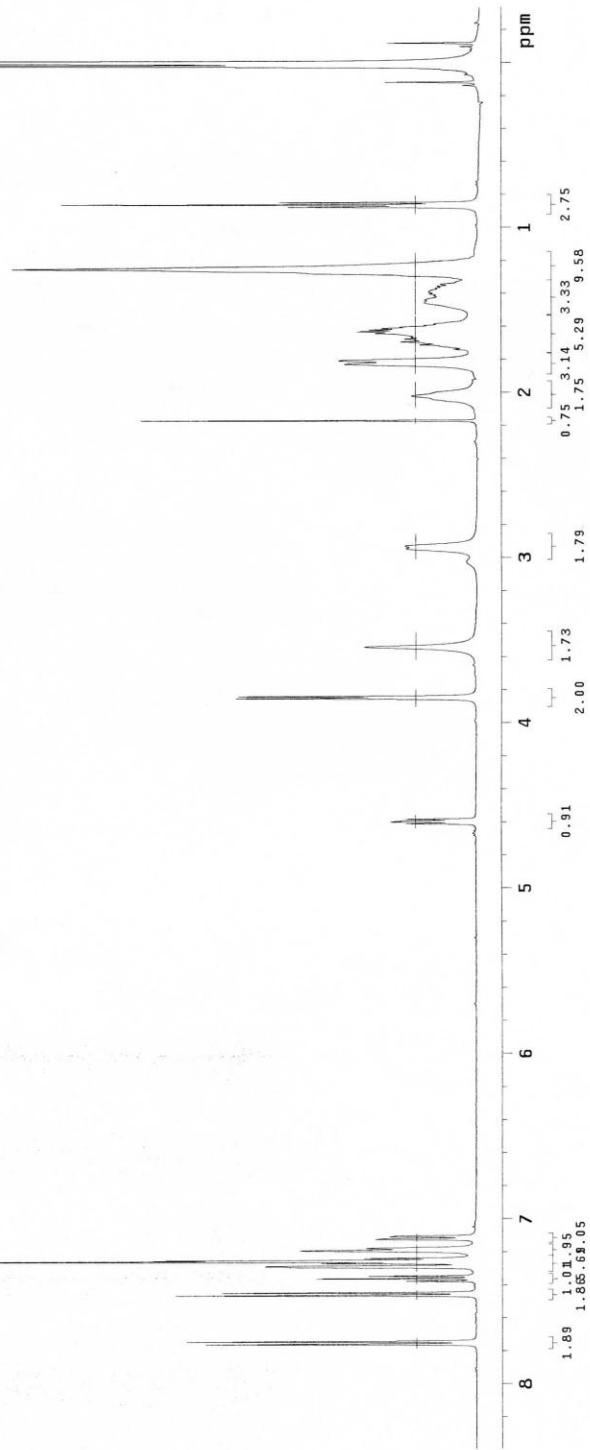



JD-123

Sample Name:

JD-123  
Data Collected on:  
b137621-inova500  
Archive directory:  
/home/efect/vnmr/sys/data  
JD-123\_20110716\_02  
FidFile: CARBON

Pulse Sequence: CARBON (s2pul)  
Solvent: cdcl3  
Data collected on: Jul 16 2011

Temp.: 24.5 C / 297.6 K

Operator: vnmr1

Relax. delay 1.000 sec

Pulse 45.0 degrees

Acq. time 1.043 sec

Width 31421.8 Hz

WDW EM

SSB 0

RG 512

DECUPLE CH1, 439.7072491 MHz

Power 36 dB

continuously on

WALTZ-16 modulated

DATA PROCESSING

Line broadening 0.5 Hz

Hz

Total time 28 hr, 29 min

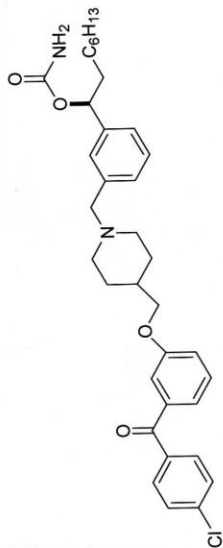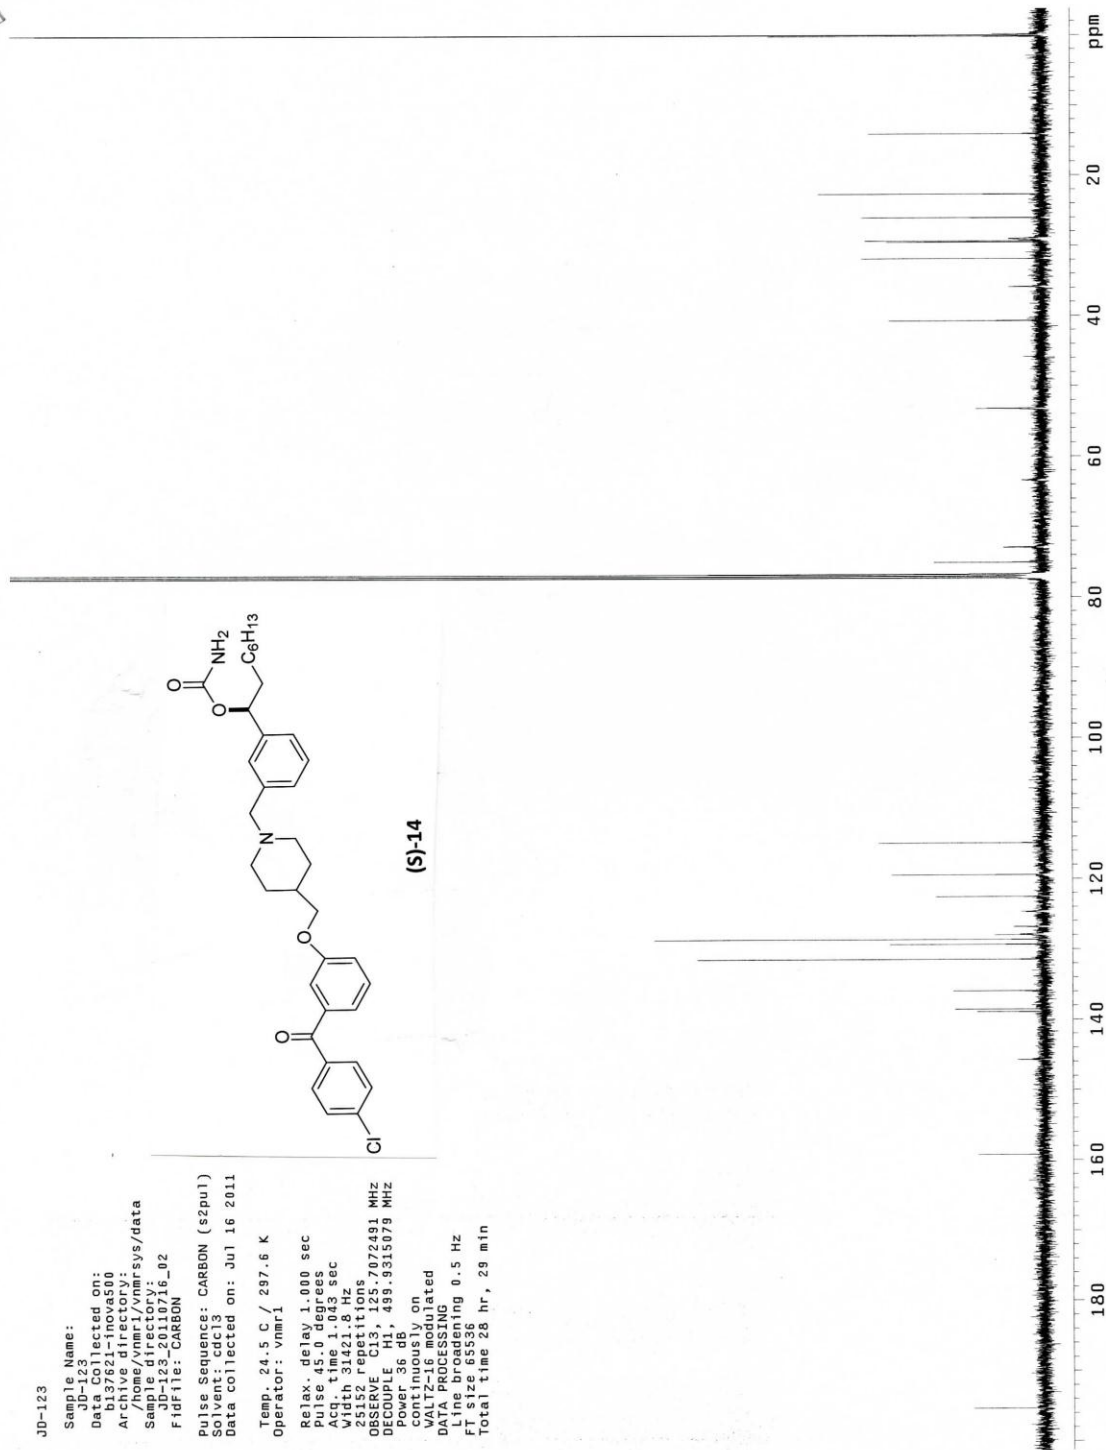

JD-72

Sample Name:  
JD-72 collected on:  
Data 3021060300  
Archive directory:  
/home/vnmr1/vnmrsys/data  
Sample directory:  
JD-72\_20110603\_02  
FidFile: data\_szpul\_001  
Pulse Sequence: PROTON (szpul)  
Solvent: cdc13  
Data collected on: Jun 3 2011

Operator: vnmr1  
Relax. delay 1.000 sec  
Pulse 45.0 degrees  
Acq. 186.205 sec  
Vch: 799.2 MHz  
16 repetitions  
OBSERVE H1, 499.9290184 MHz  
DATA PROCESSING  
FT size 32768  
Total time 0 min 49 sec

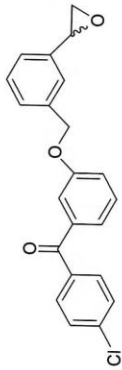

rac-49

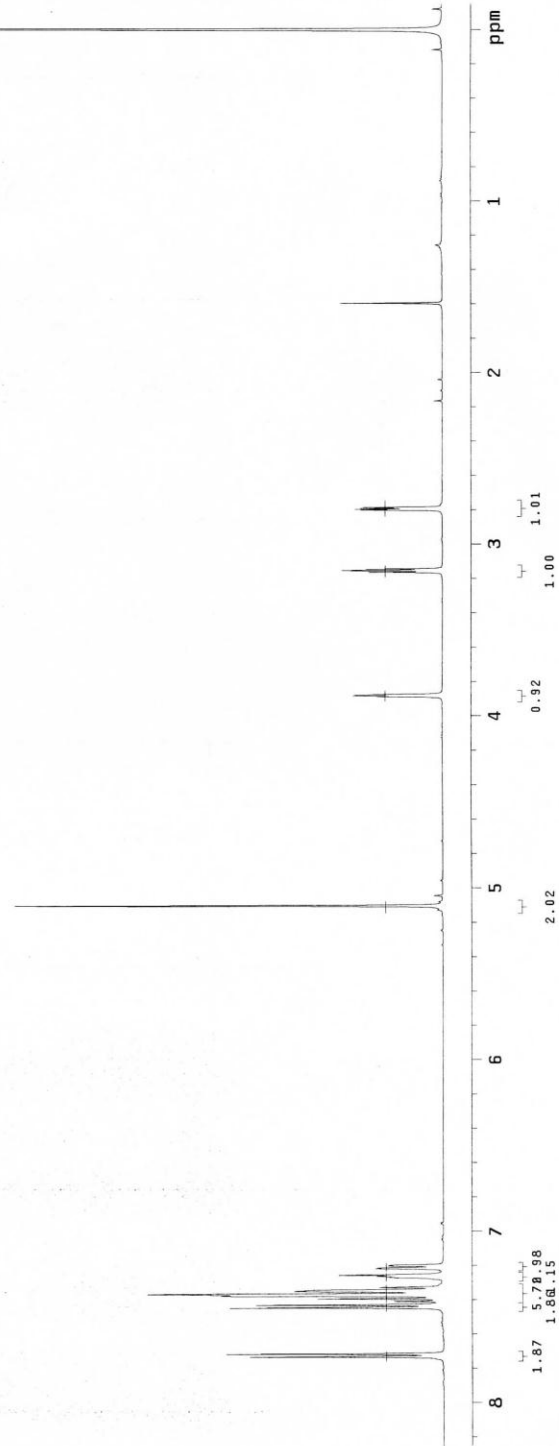

JD-72-13C

Sample Name: JD-72-13C  
Date collected on: 6/3/11  
By: [redacted]  
File directory: /home/vnmr1/vmrsys/data  
Sample directory: JD-72-13C\_20110603\_01  
FidFile: CARBON  
Pulse Sequence: CARBON (s2pul)  
Solvent: cdcl3  
Data collected on: Jun 3 2011  
Operator: vnmr1  
Relax. delay 1.000 sec  
Pulse 45.0 degrees  
Acq. time 1.043 sec  
Inj. time 2.000 sec  
6784 repetitions  
OBSERVE: C13, 125.7072249 MHZ  
DECOUPLE: H1, 499.9315079 MHZ  
Power 36 dB  
continuously on  
WALTZ-16 modulated  
DATA PROCESSING  
Delta Processing 0.5 Hz  
FT size 655536  
Total time 5 hr, 41 min

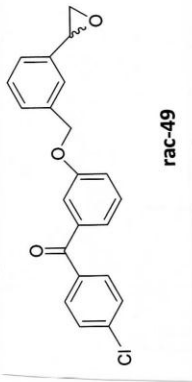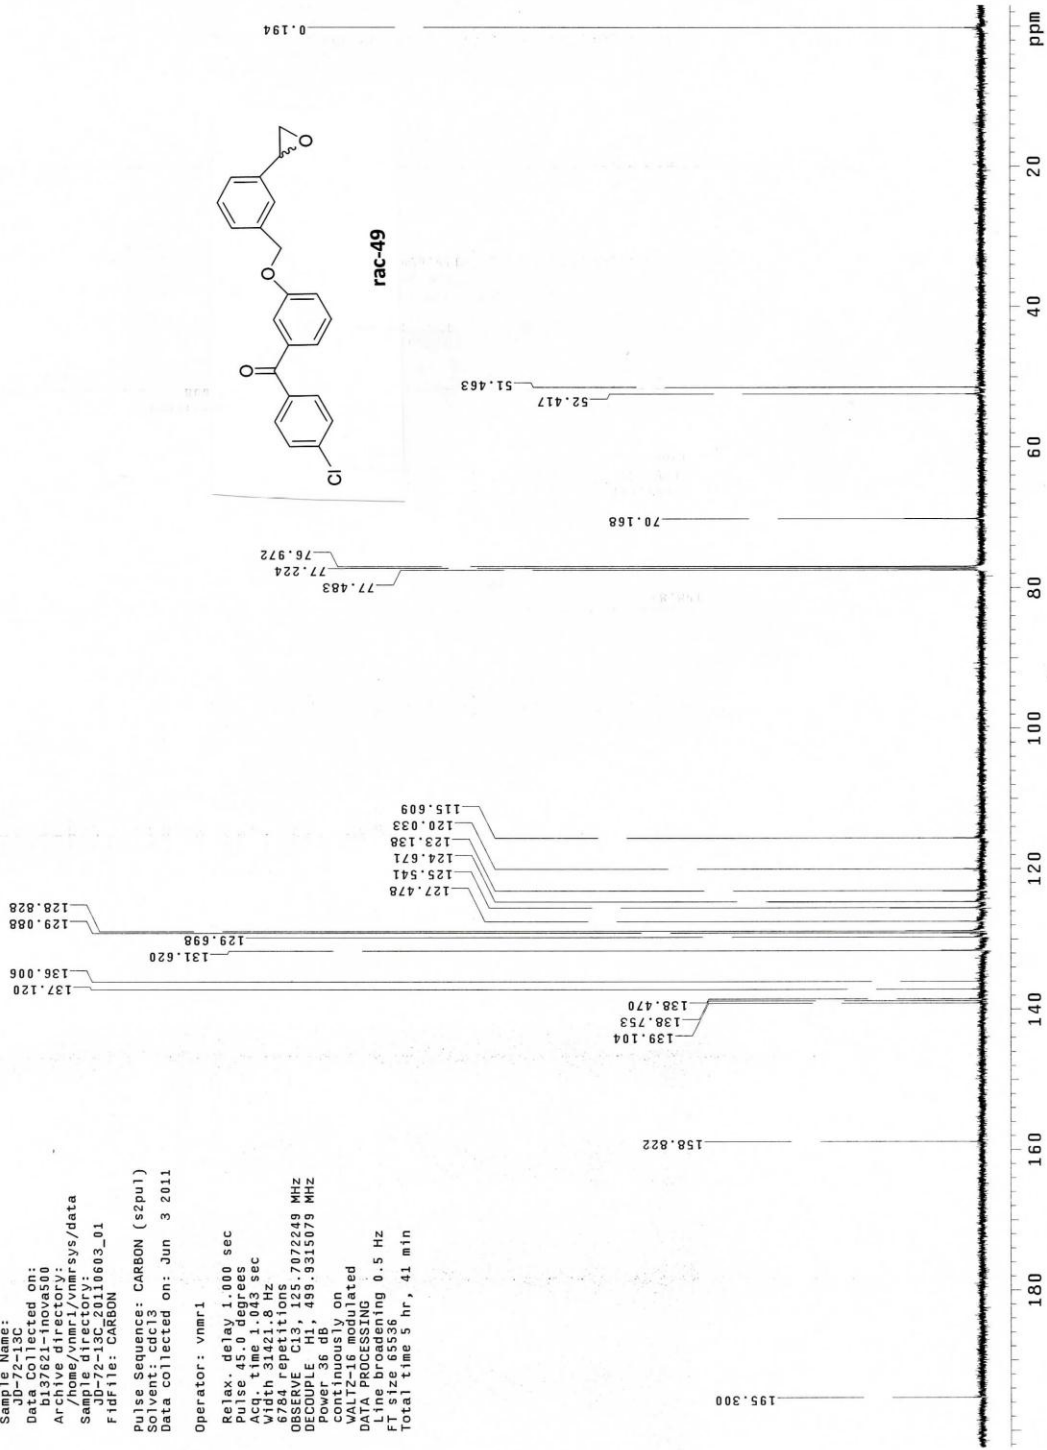

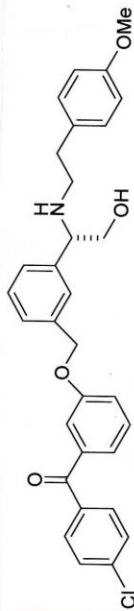

JD-95-UP  
 Sample Name:  
 JD-95-UP  
 Data Collected on:  
 b137621-inova500  
 Archive directory:  
 /opt/chemsyst/data  
 Sample directory:  
 JD-95-UP\_20110620\_01  
 FIDFile: data\_s2pu1\_001  
 Pulse Sequence: PROTON (s2pu1)  
 Solvent: CDCl3  
 Data collected on: Jun 20 2011  
 Operator: vnmr1  
 Relax. delay 1.000 sec  
 Pulse 45.0 degrees  
 Acq. time 2.048 sec  
 Width 7999.2 Hz  
 Repeats 499  
 9290174 MHz  
 OB  
 DATA PROCESSING  
 FT size 32768  
 Total time 0 min 24 sec

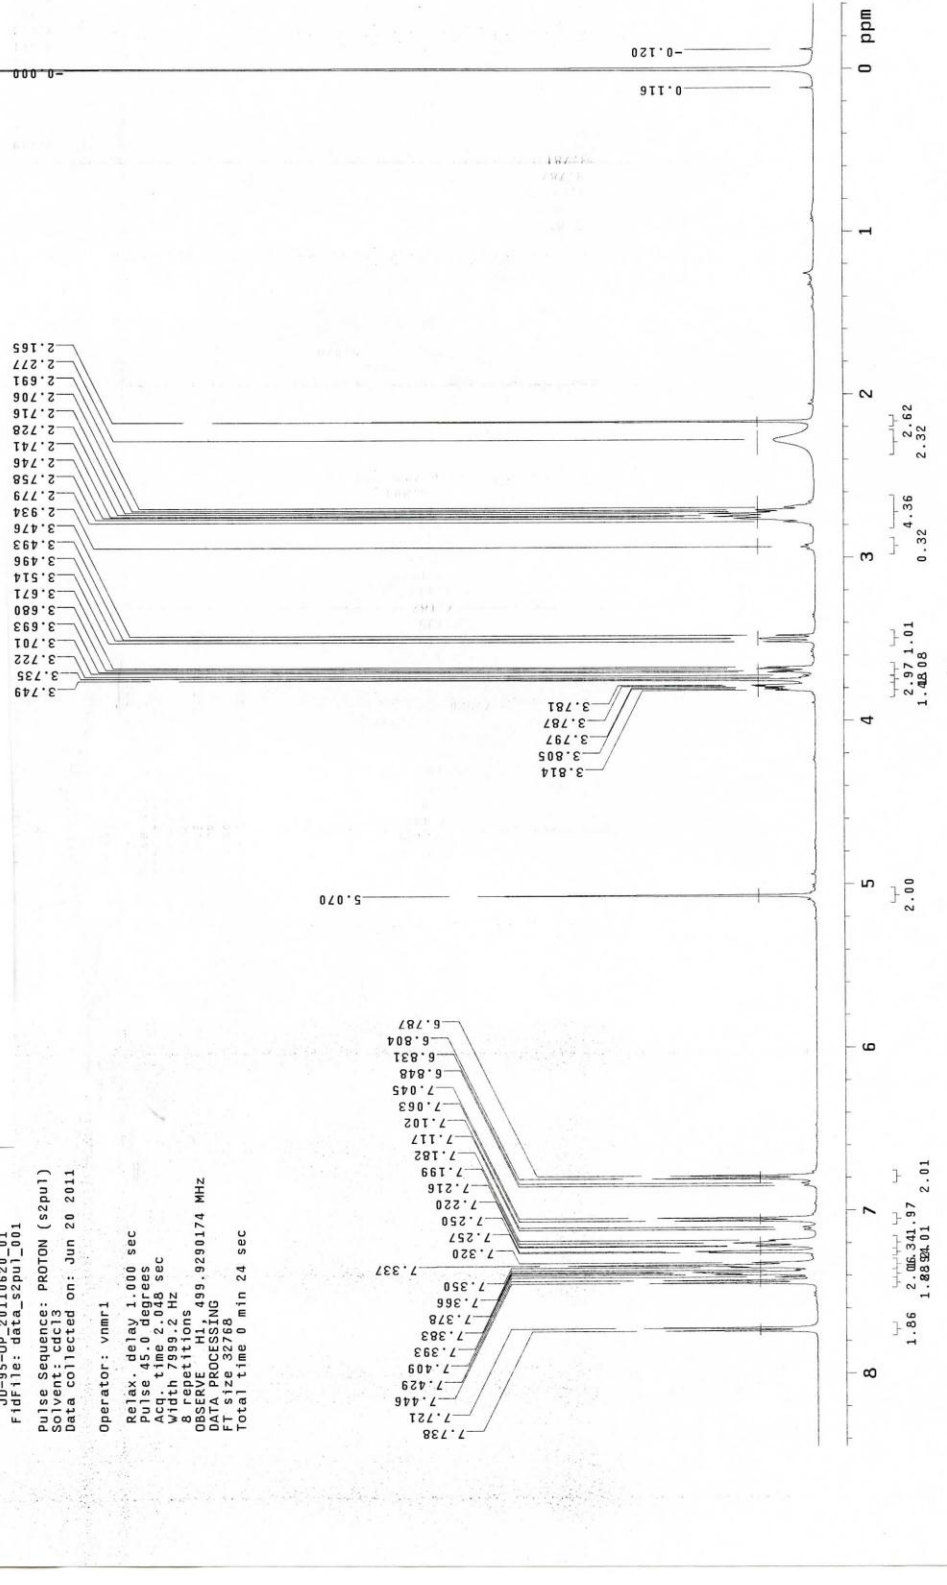

STANDARD CARBON PARAMETERS

Sample Name: JD-95-UP-13C

Data Collected on:  
b137621-inova500

Archive directory:

Sample directory:

FidFile: CARBON

Pulse Sequence: CARBON (s2pul)

Solvent: cdcl3

Data collected on: Jun 20 2011

Temp: 24.6 C / 297.8 K

Operator: vmmr1

Relax. delay 1.000 sec

Pulse 45.0 degrees

Acq. time 1.043 sec

Width 31421.8 Hz

Frequency 125.761 MHz

OBSERVE C13, 125.7072491 MHZ

DECOUPLE H1, 499.9315079 MHZ

Power 36 dB

continuously on

WALTZ-16 modulated

DATA PROCESSING

FT freq broadening 0.5 Hz

FT Hz 65556

Total time 56 hr, 59 min

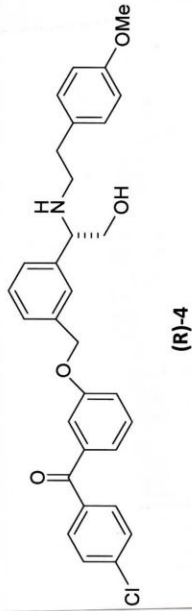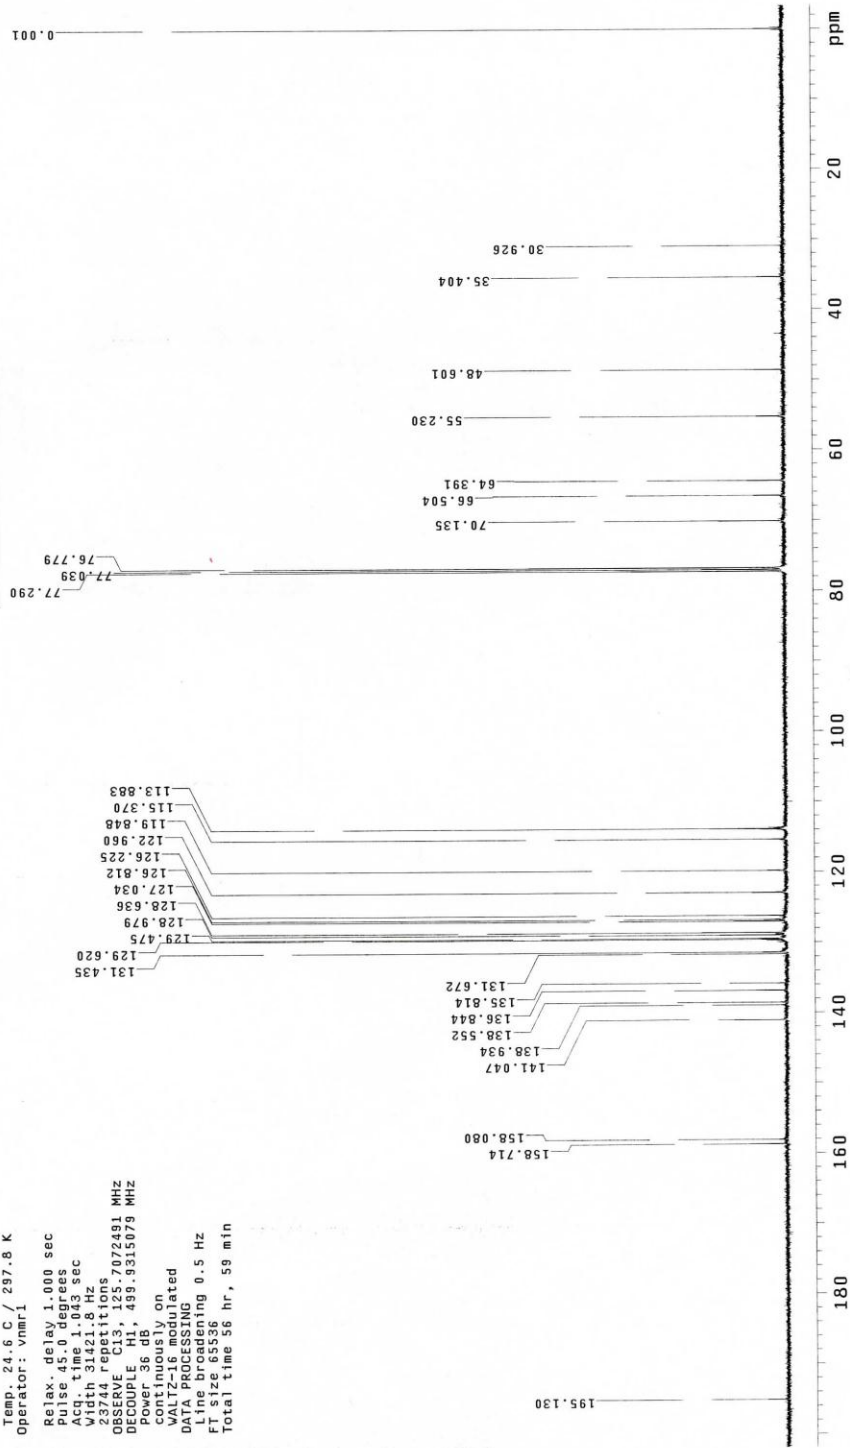

## ==== Shimadzu LabSolutions Analysis Report ====

C:\LabSolutions\Data\Project1\Joy Data\HPLC-Compound\Sample-17.lcd  
 Acquired by : System Administrator  
 Sample Name : JD-07-16-2011  
 Sample ID :  
 Tray# : 1  
 Vial# : 1  
 Injection Volume : 1  
 Data File : C:\LabSolutions\Data\Project1\Joy Data\HPLC-Compound\Sample-17.lcd  
 Method File : C:\LabSolutions\Data\Project1\Joy training\Mixture-235nm-62%ACN.lcm  
 Report Format File : C:\LabSolutions\System\DEFAULT.lsr  
 Month-Day Acquired : 10/5/2011  
 Month-Day Processed : 10/5/2011

### <Chromatogram>

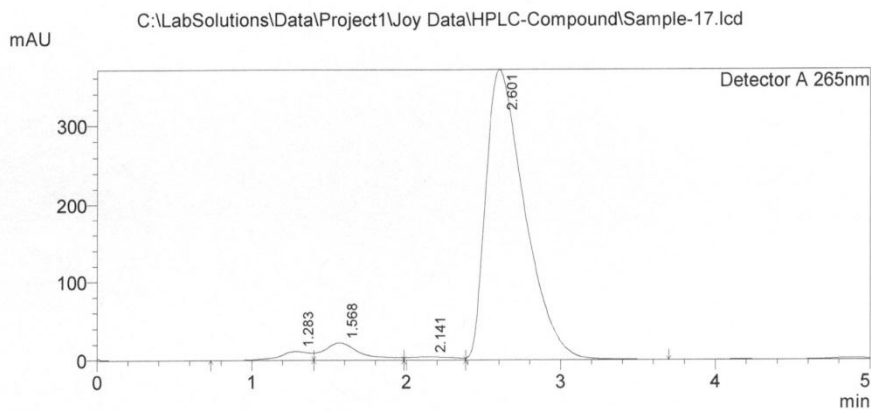

MS Chromatogram

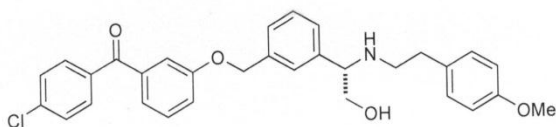

Column: Phenomenex kinetex 2.6 $\mu$  C18 100A, 100 x 4.60 mm  
 Solvent: CH<sub>3</sub>CN/0.05%TFA in H<sub>2</sub>O = 25/1  
 flow rate: 0.5 mL/min.

C:\LabSolutions\Data\Project1\Joy Data\HPLC-Compound\Sample-17.lcd







## ==== Shimadzu LabSolutions Analysis Report ====

C:\LabSolutions\Data\Project1\Joy Data\HPLC-Compound\Sample-16.lcd  
 Acquired by : System Administrator  
 Sample Name : JD-07-16-2011  
 Sample ID :  
 Tray# : 1  
 Vial# : 1  
 Injection Volume : 1  
 Data File : C:\LabSolutions\Data\Project1\Joy Data\HPLC-Compound\Sample-16.lcd  
 Method File : C:\LabSolutions\Data\Project1\Joy training\Mixture-235nm-62%ACN.lcm  
 Report Format File : C:\LabSolutions\System\DEFAULT.lsr  
 Month-Day Acquired : 10/5/2011  
 Month-Day Processed : 10/5/2011

### <Chromatogram>

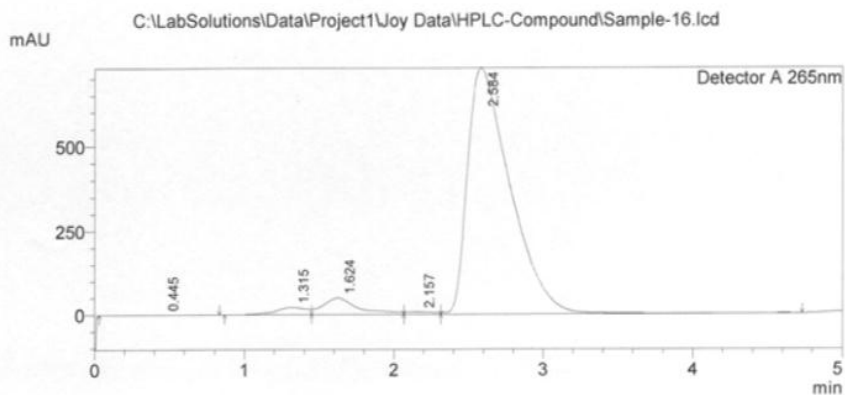

MS Chromatogram

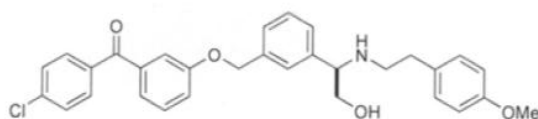

Column: Phenomenex kinetex 2.6 $\mu$  C18 100A, 100 x 4.60 mm  
 Solvent: CH<sub>3</sub>CN/0.05%TFA in H<sub>2</sub>O = 25/1  
 flow rate: 0.5 mL/min.

C:\LabSolutions\Data\Project1\Joy Data\HPLC-Compound\Sample-16.lcd

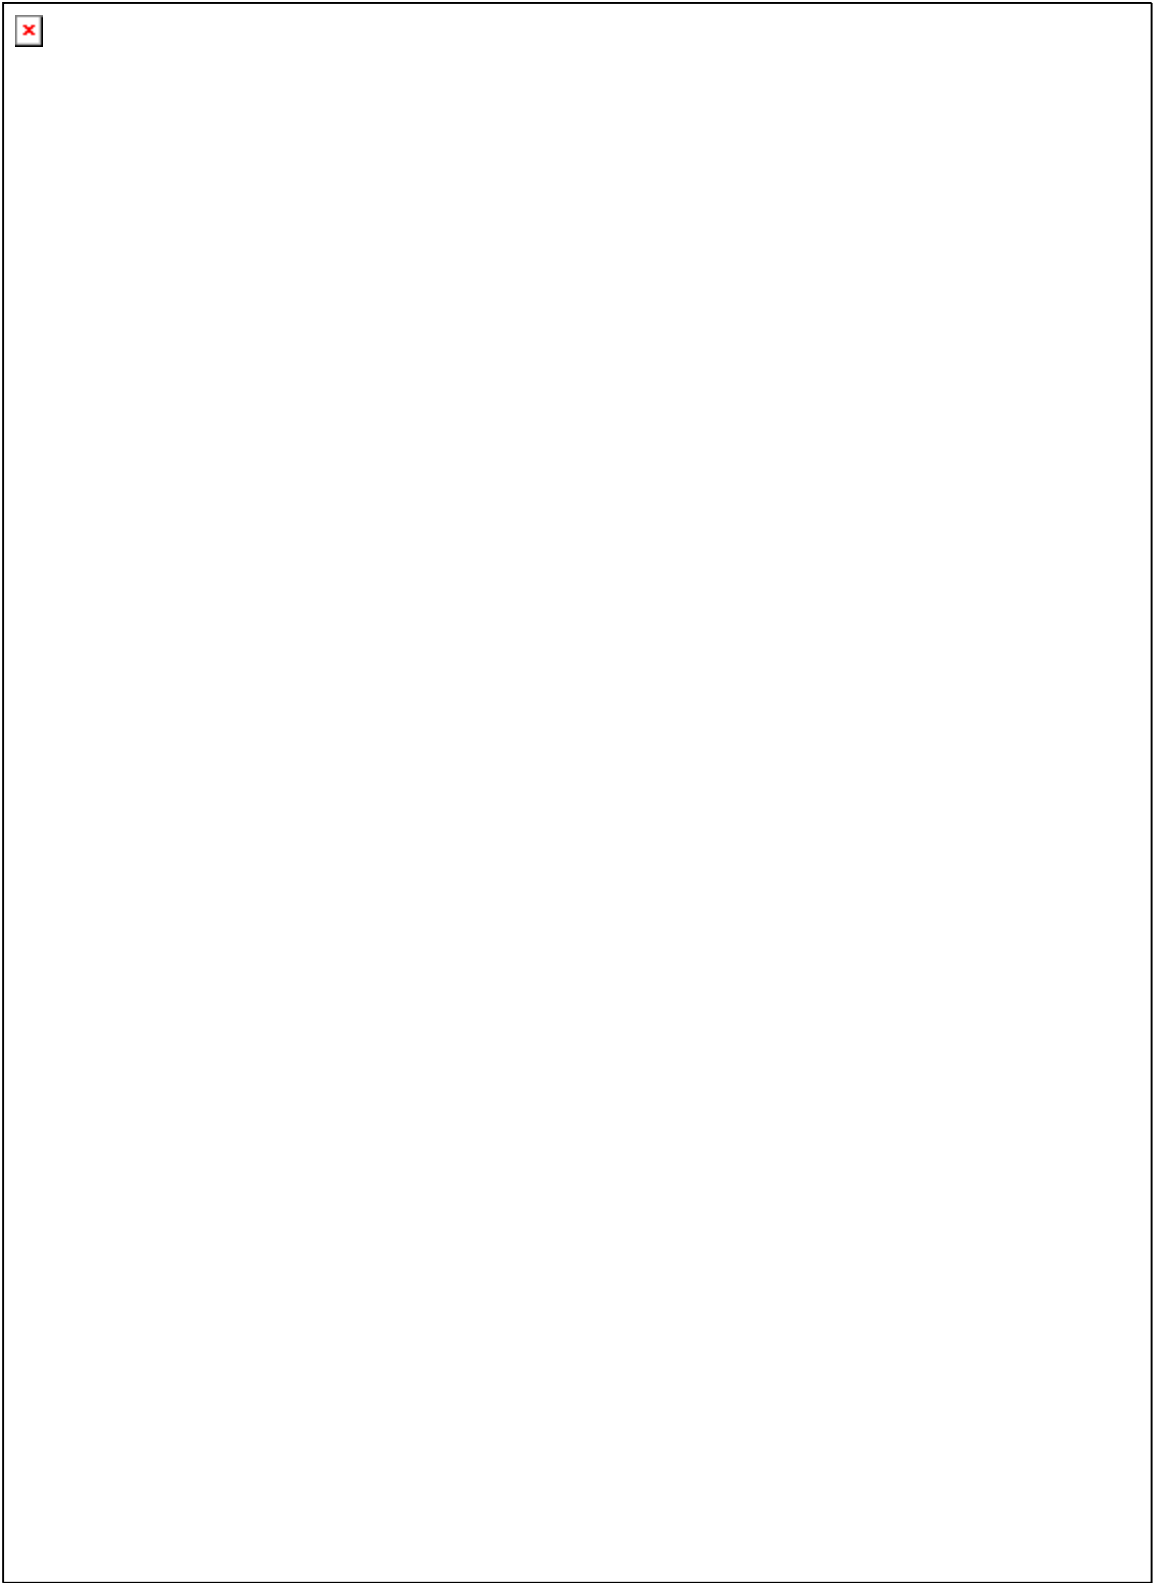

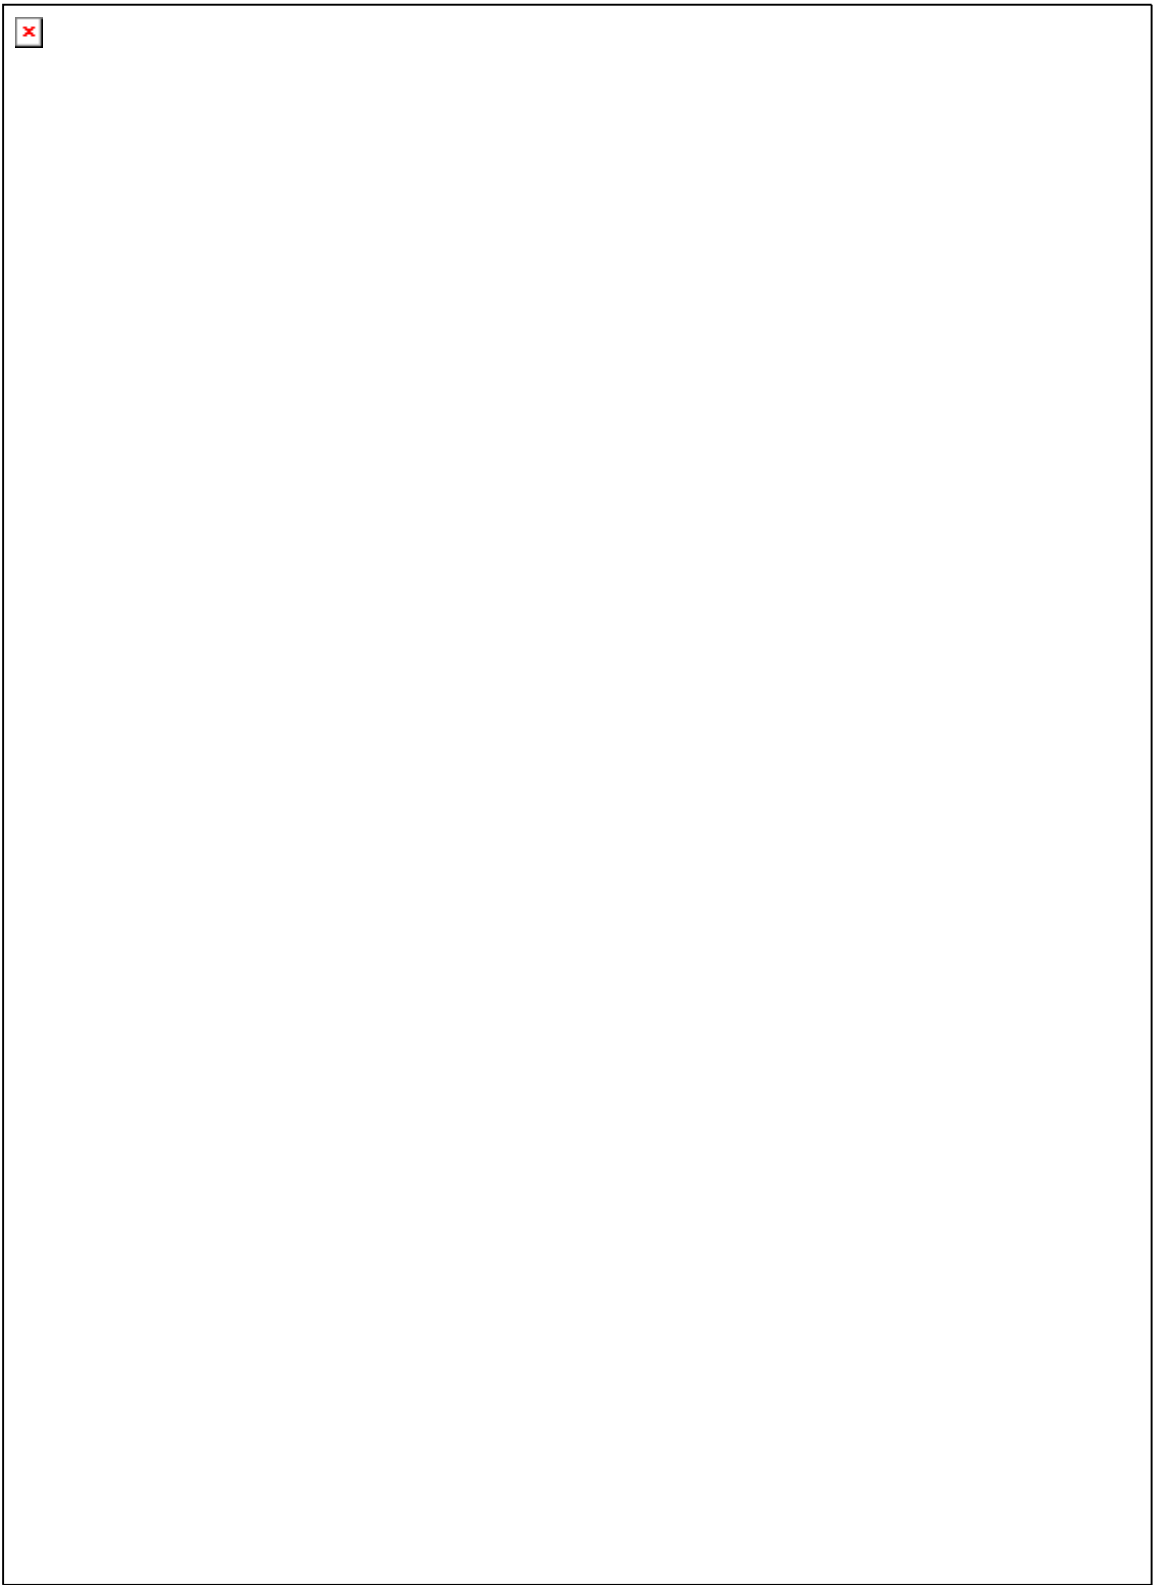





STANDARD CARBON PARAMETERS

Sample Name:  
Data Collected on:  
b137621-inova500  
Archive directory:  
Sample directory:  
FidFile: CARBON  
Pulse Sequence: CARBON (s2pu1)  
Solvent: cdcl3  
Data collected on: Aug 17 2011  
Temp. 24.2 C / 297.4 K  
Operator: vnmr1  
Relax. delay 1.000 sec  
Pulse 45.0 degrees  
Acq. time 1.043 sec  
Width 31421.8 Hz  
9600 repetitions  
OBSERVE CH1, 459.7072481 MHz  
PULSE PRG, 459.9315079 MHz  
Power 36 dB,  
continuously on  
WALTZ-16 modulated  
DATA PROCESSING  
Line broadening 0.5 Hz  
F1 size 63536  
Total time 17 hr, 5 min

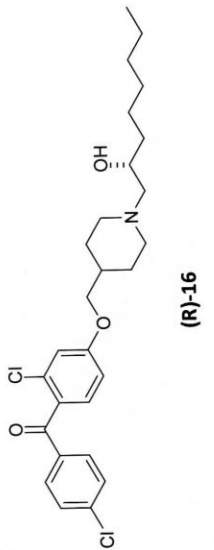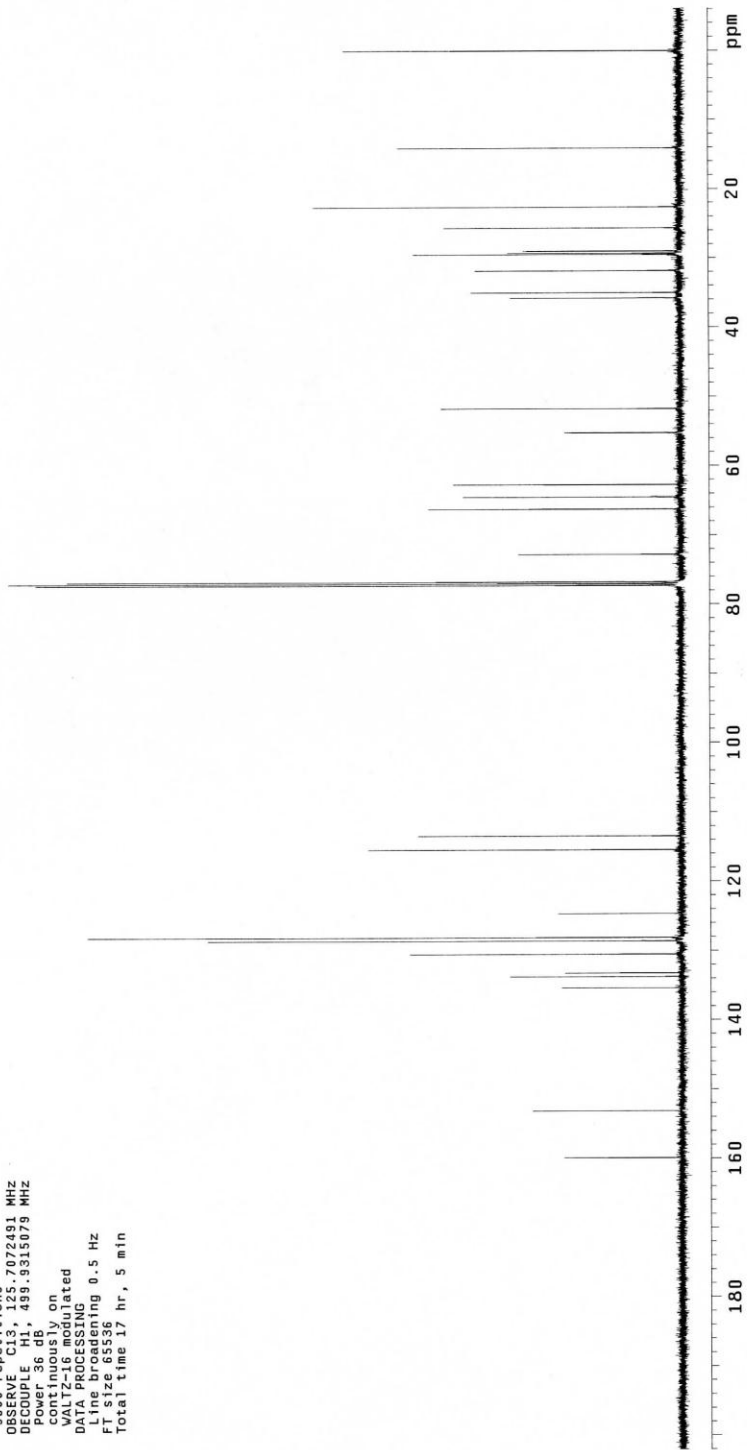

## ==== Shimadzu LabSolutions Analysis Report ====

C:\LabSolutions\Data\Project1\Joy Data\HPLC-Compound\Sample-11.lcd  
Acquired by : System Administrator  
Sample Name : JD-07-16-2011  
Sample ID :  
Tray# : 1  
Vial# : 1  
Injection Volume : 1  
Data File : C:\LabSolutions\Data\Project1\Joy Data\HPLC-Compound\Sample-11.lcd  
Method File : C:\LabSolutions\Data\Project1\Joy training\Mixture-235nm-62%ACN.lcm  
Report Format File : C:\LabSolutions\System\DEFAULT.lsr  
Month-Day Acquired : 10/5/2011  
Month-Day Processed : 10/5/2011

## &lt;Chromatogram&gt;

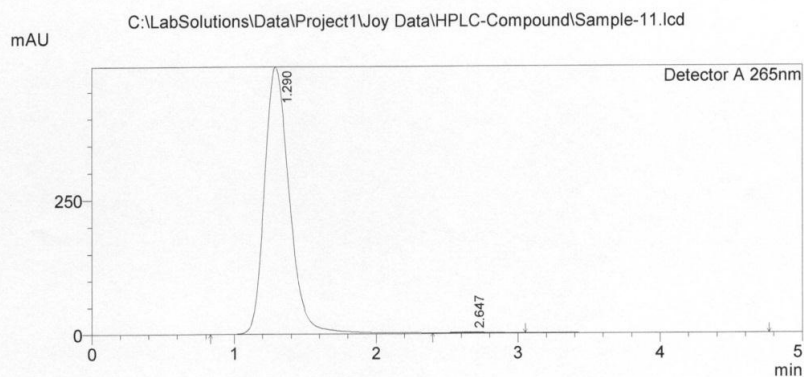

MS Chromatogram

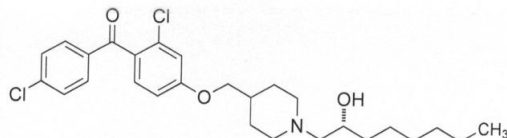

Column: Phenomenex kinetex 2.6 $\mu$  C18 100A, 100 x 4.60 mm  
Solvent: CH<sub>3</sub>CN/0.05%TFA in H<sub>2</sub>O = 25/1  
flow rate: 0.5 mL/min.

C:\LabSolutions\Data\Project1\Joy Data\HPLC-Compound\Sample-11.lcd

JD-101

Sample Name:

JD-101  
Data Collected on:  
bl37621-inova500  
Archive directory:  
/home/vnmr1/vnmrSYS/data  
Sample: JD-101\_20110628\_01  
FidFile: data\_s2pul\_001

Pulse Sequence: PROTON (s2pul)  
Solvent: cdcl3  
Data collected on: Jun 28 2011

Operator: vnmr1

Relax. delay 1.000 sec  
Pulse 45.0 degrees  
Acq. time 2.048 sec  
Width 7899.2 Hz  
16 Repetitions  
OBSERVED F1: 99.9290164 MHz  
DUMPED TO: 600CE51MG  
FT size 32768  
Total time 0 min 49 sec

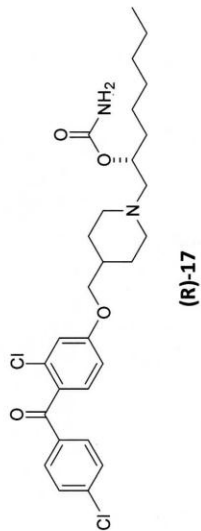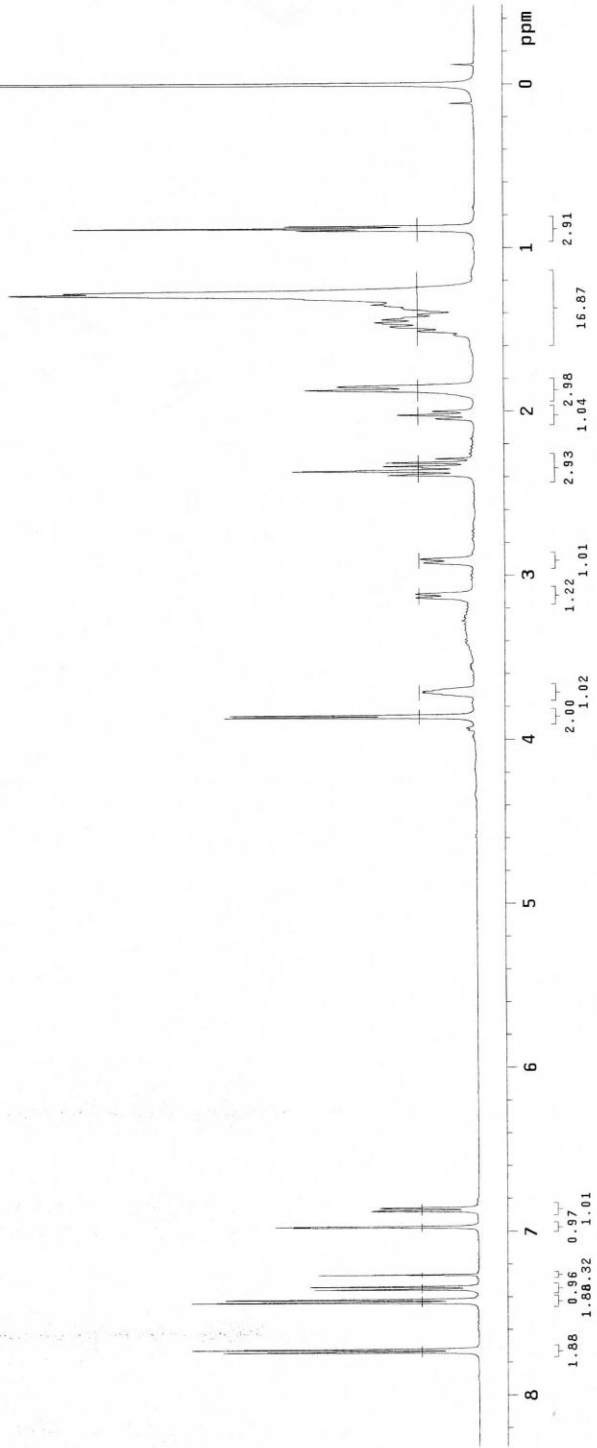



STANDARD CARBON PARAMETERS

Sample Name:  
 Data collected on: b137621-inova500  
 Archive directory:  
 Sample directory:  
 FIDFile: CARBON  
 Pulse sequence: CARBON (s2pul1)  
 Solvent: cdcl3  
 Data collected on: Jun 28 2011  
 Temp.: 24.5 C / 297.6 K  
 Operator: vnmr1  
 Relax. delay 1.000 sec  
 Pulse 45.0 degrees  
 Acq. time 1.843 sec  
 24448 repetitions  
 OBSERVE C13, 125.7072491 MHZ  
 DECOUPLE H1, 499.9315079 MHZ  
 Power 36 dB  
 continuously on  
 WALTZ16 modulated  
 D1 0.05000000 sec  
 Line broadening 0.5 Hz  
 FT size 65536  
 Total time 56 hr, 59 min

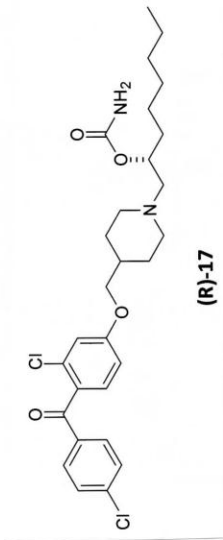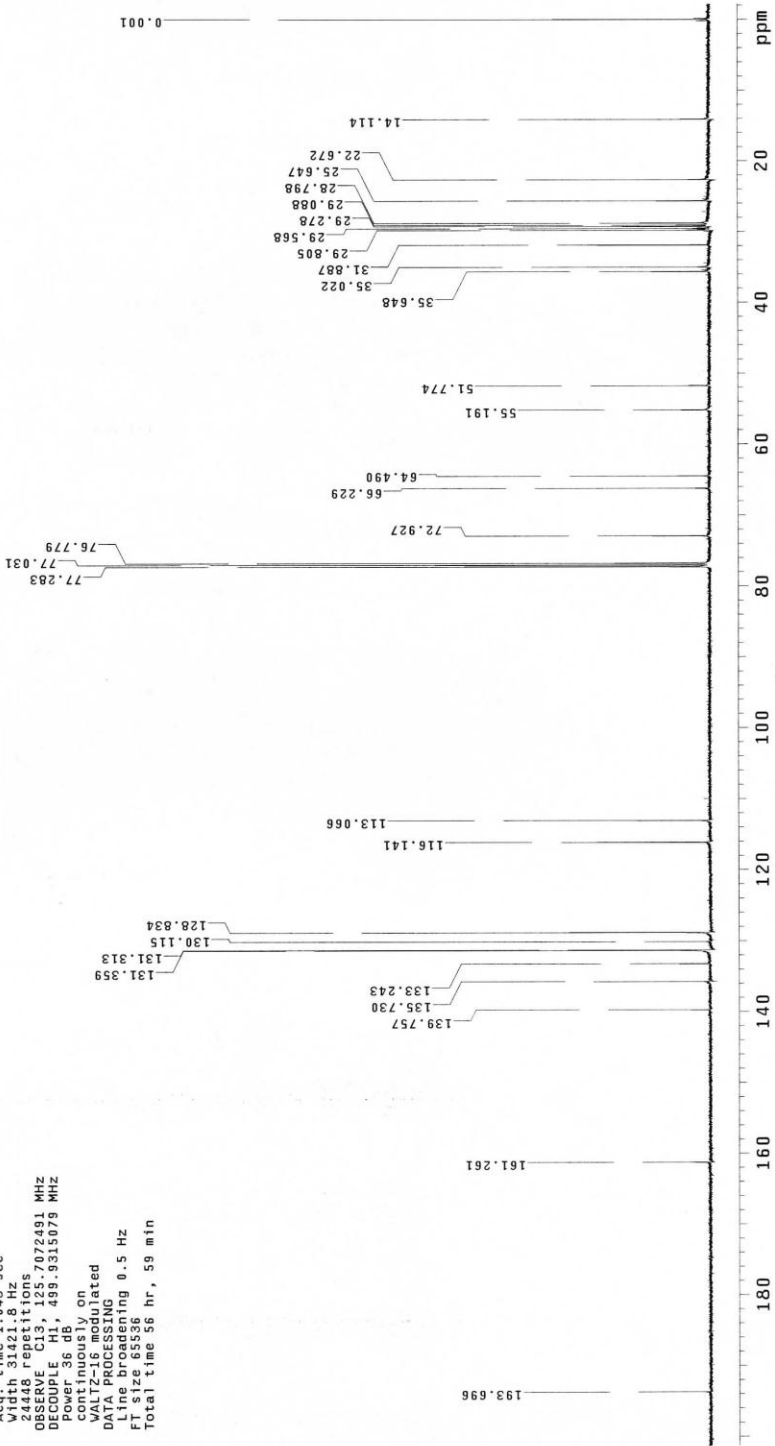

### ==== Shimadzu LabSolutions Analysis Report ====

C:\LabSolutions\Data\Project1\Joy Data\HPLC-Compound\Sample-13.lcd  
 Acquired by : System Administrator  
 Sample Name : JD-07-16-2011  
 Sample ID :  
 Tray# : 1  
 Vial# : 1  
 Injection Volume : 1  
 Data File : C:\LabSolutions\Data\Project1\Joy Data\HPLC-Compound\Sample-13.lcd  
 Method File : C:\LabSolutions\Data\Project1\Joy training\Mixture-235nm-62%ACN.lcm  
 Report Format File : C:\LabSolutions\System\DEFAULT.lsr  
 Month-Day Acquired : 10/5/2011  
 Month-Day Processed : 10/5/2011

#### <Chromatogram>

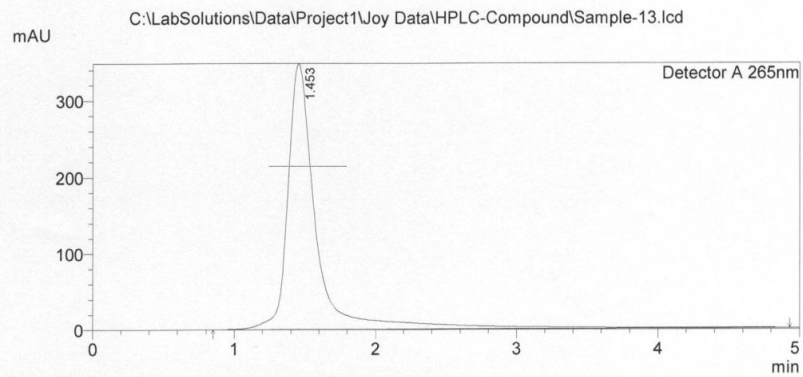

MS Chromatogram

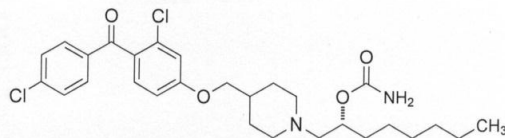

Column: Phenomenex kinetex 2.6 $\mu$  C18 100A, 100 x 4.60 mm  
 Solvent: CH<sub>3</sub>CN/0.05%TFA in H<sub>2</sub>O = 25/1  
 flow rate: 0.5 mL/min.

C:\LabSolutions\Data\Project1\Joy Data\HPLC-Compound\Sample-13.lcd

JD-121

Sample Name:

JD-121  
Data Collected on:  
b137621-inova500  
Archive directory:  
Name: vmsc1000mmsys\data  
Sample directory:  
JD-121\_20110713\_01  
FidFile: data\_s2pul\_001

Pulse Sequence: PROTON (s2pul)  
Solvent: cdcl3  
Data Collected on: Jul 13 2011

Operator: vmr1

Relax. delay 1.000 sec  
Pulse 45.0 degrees  
Acq. time 2.048 sec  
Width 7999.2 Hz  
16 repetitions  
SOLVENT: CDCL3  
DATA PROCESSING  
FT size 32768  
Total time 0 min 49 sec

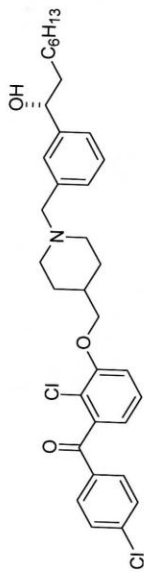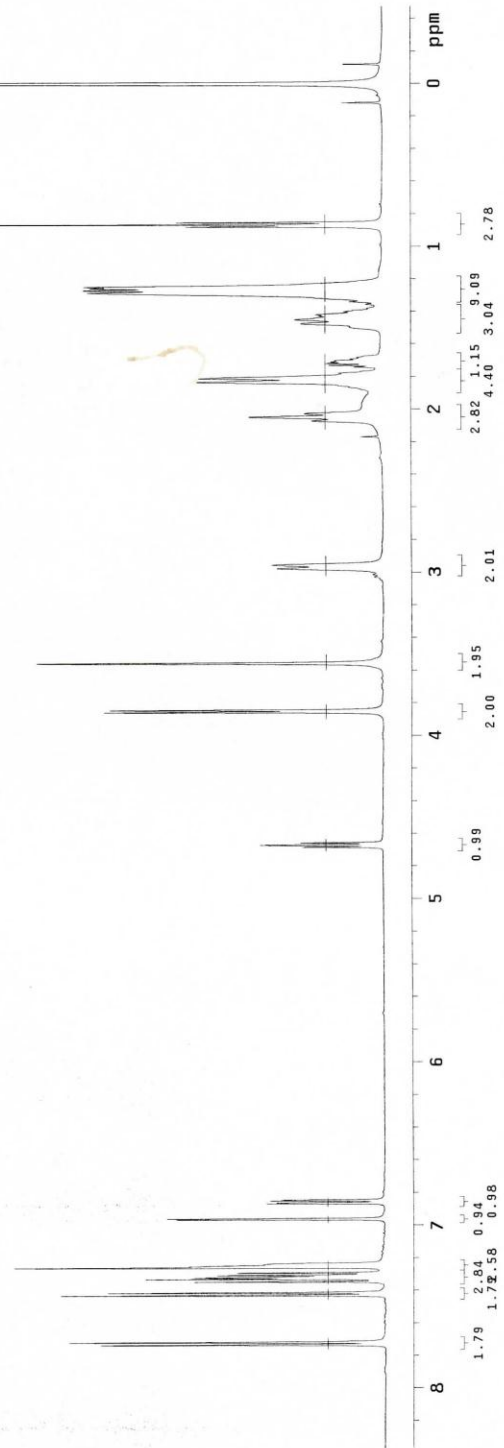

JD-121-13C

Sample Name:  
JD-121-13C  
Data Collected on:  
b137621-inova500  
Archive directory:  
/home/vnmr1/vnmr-sys/data  
Set:  
JD-121-13C.20110714.02  
FidFile: data\_s2pul\_001

Pulse Sequence: CARBON (s2pul)  
Solvent: cdcl3  
Data Collected on: Jul 14 2011

Operator: vnmr1

Relax. delay 1.000 sec  
Pulse 45.0 degrees  
Acq. time 1.043 sec  
Width 31421.8 Hz  
10000 repetitions  
SOLVENT CH3, 163.772493 MHz  
DECODE CH3, 493.3315073 MHz  
Power 36 dB  
continuously on  
WALTZ-16 modulated  
DATA PROCESSING  
Line broadening 0.5 Hz  
Fsize 65536  
Total time 3 hr, 41 min

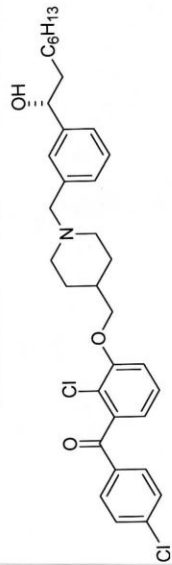

(S)-6

180 160 140 120 100 80 60 40 20 ppm

## ==== Shimadzu LabSolutions Analysis Report ====

C:\LabSolutions\Data\Project1\Joy Data\HPLC-Compound\Sample-20.lcd  
 Acquired by : System Administrator  
 Sample Name : JD-07-16-2011  
 Sample ID :  
 Tray# : 1  
 Vial# : 1  
 Injection Volume : 1  
 Data File : C:\LabSolutions\Data\Project1\Joy Data\HPLC-Compound\Sample-20.lcd  
 Method File : C:\LabSolutions\Data\Project1\Joy training\Mixture-235nm-62%ACN.lcm  
 Report Format File : C:\LabSolutions\System\DEFAULT.lsr  
 Month-Day Acquired : 10/5/2011  
 Month-Day Processed : 10/5/2011

### <Chromatogram>

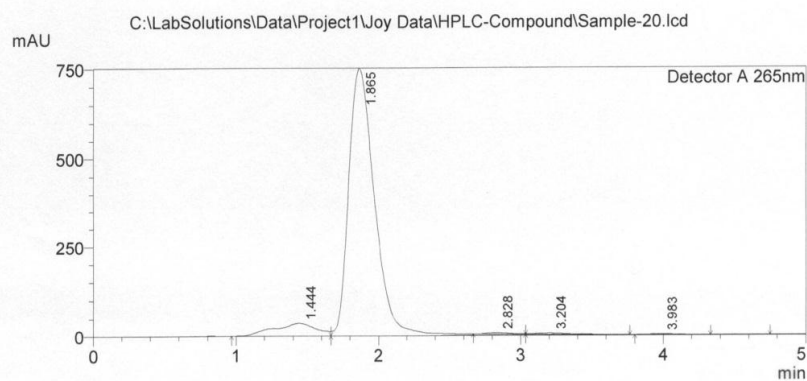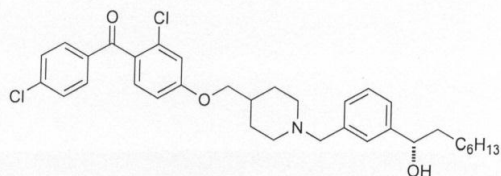

Column: Phenomenex kinetex 2.6 $\mu$  C18 100A, 100 x 4.60 mm  
 Solvent: CH<sub>3</sub>CN/0.05%TFA in H<sub>2</sub>O = 25/1  
 flow rate: 0.5 mL/min.

C:\LabSolutions\Data\Project1\Joy Data\HPLC-Compound\Sample-20.lcd

JD-120

Sample Name:  
JD-120  
Data Collected on:  
bl37621-inova500  
Archive directory:  
/home/vnmr1/vmarsys/data  
Sap-120 directory:  
JD-120 directory: 01  
FidFile: data\_s2pul\_001

Pulse Sequence: PROTON (s2pul)  
Solvent: cdcl3  
Data collected on: Jul 12 2011

Operator: vnmr1  
Relax delay 1.000 sec  
Pulse 45.0 degrees  
Acq. time 2.048 sec  
Width 7999.2 Hz  
32 repetitions  
OBSERVE H1, 499.9290184 MHz  
DATA PROCESSING  
P1 12.000 sec  
Total time 1 min 38 sec

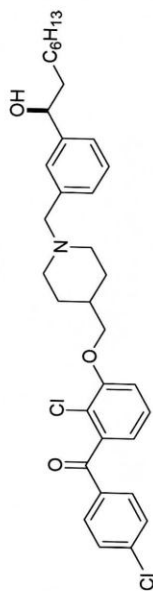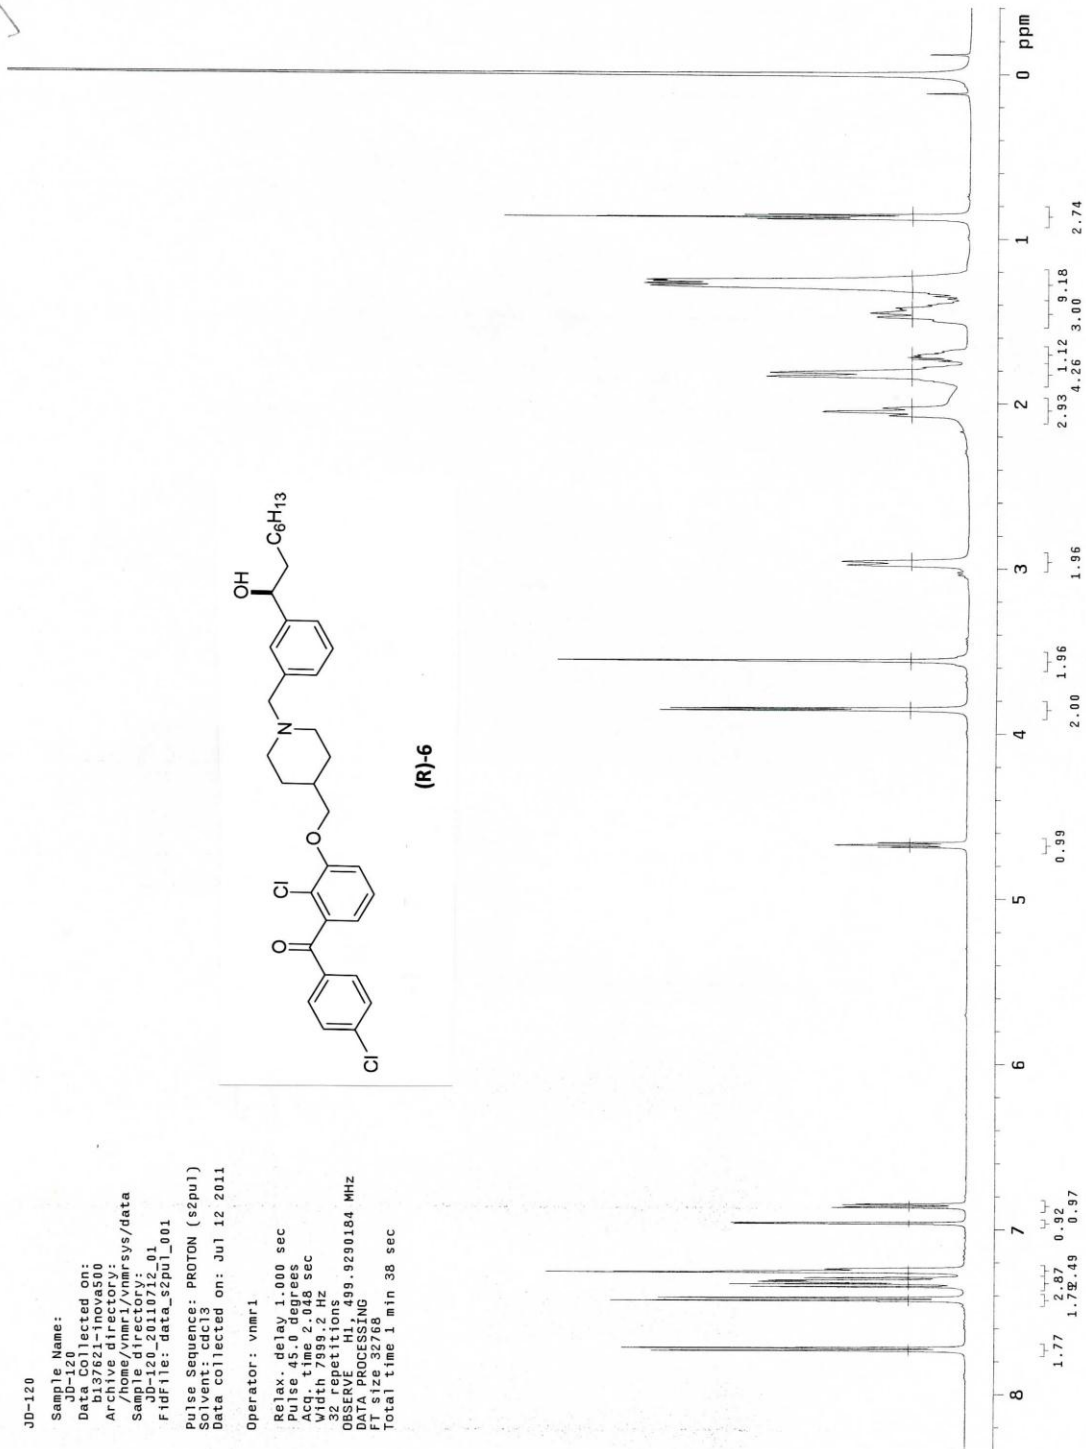

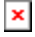

## ==== Shimadzu LabSolutions Analysis Report ====

C:\LabSolutions\Data\Project1\Joy Data\HPLC-Compound\Sample-20.lcd  
 Acquired by : System Administrator  
 Sample Name : JD-07-16-2011  
 Sample ID :  
 Tray# : 1  
 Vial# : 1  
 Injection Volume : 1  
 Data File : C:\LabSolutions\Data\Project1\Joy Data\HPLC-Compound\Sample-20.lcd  
 Method File : C:\LabSolutions\Data\Project1\Joy training\Mixture-235nm-62%ACN.lcm  
 Report Format File : C:\LabSolutions\System\DEFAULT.lsr  
 Month-Day Acquired : 10/5/2011  
 Month-Day Processed : 10/5/2011

### <Chromatogram>

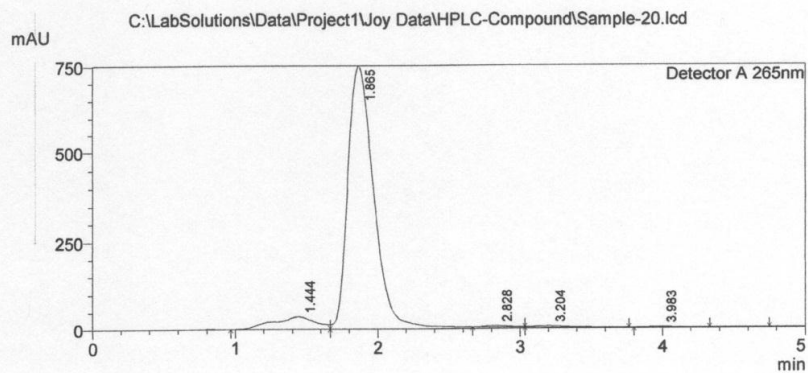

MS Chromatogram

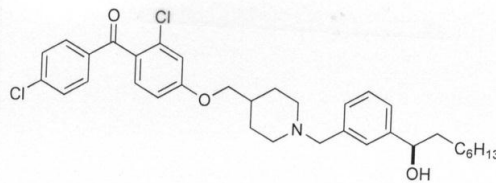

Column: Phenomenex kinetex 2.6 $\mu$  C18 100A, 100 x 4.60 mm  
 Solvent: CH<sub>3</sub>CN/0.05%TFA in H<sub>2</sub>O = 25/1  
 flow rate: 0.5 mL/min.

C:\LabSolutions\Data\Project1\Joy Data\HPLC-Compound\Sample-20.lcd













JD-126-13C

Sample Name:  
JD-126-13C  
Data collected on:  
6/17/2011 11:05:00  
Archive directory:  
/home/vnmr1/vnmrsys/data  
Sample directory:  
JD-126-13C\_20110727\_01  
Fid file: CARBON

Pulse Sequence: CARBON (s2pul)  
Solvent: cdc13  
Data collected on: Jul 27 2011

Temp: 24.9 C / 298.1 K  
Operator: vnmr1  
Relax. delay: 1.000 sec  
Pulse: 45.0 degrees  
Acq. time: 1.043 sec  
Width: 31421.8 Hz  
832 repetitions  
OBSERVE C13, 125.7072491 MHz  
DECOUPLE H1, 499.9315079 MHz  
Power: 30 dB  
Coupling: 100 Hz  
WALTZ-16 modulated  
DATA PROCESSING  
Line broadening: 0.5 Hz  
FT size: 65536  
Total time: 1 hr, 8 min

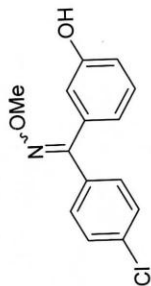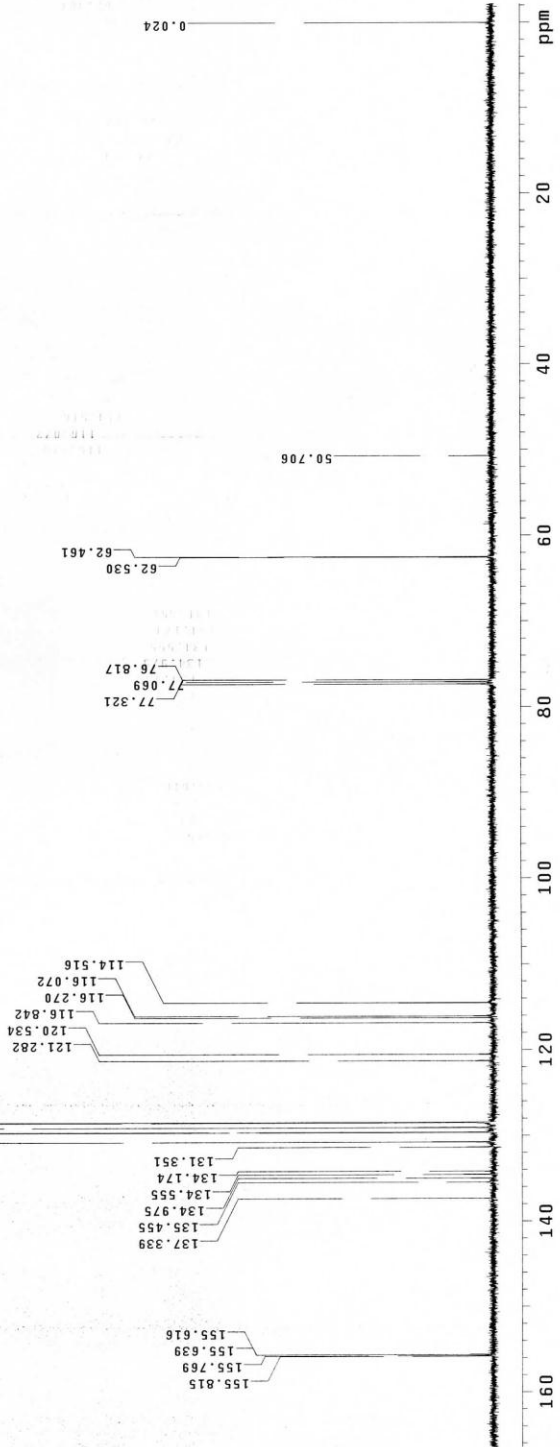

JD-129

Sample Name: JD-129  
Data Collected On: 8/1/2011 10:50  
Archive directory: /home/vnmr1/vnmrSYS/data  
Sample directory: JD-129\_20110801\_01  
FidFile: data\_s2pu1\_001  
Pulse Sequence: PROTON (s2pu1)  
Solvent: cdcl3  
Data collected on: Aug 1 2011

Temp: 23.0 C / 296.1 K  
Operator: vnmr1  
Relax. delay 1.000 sec  
Pulse program: zgpg30  
Acq. time 2.066 sec  
Width 7999.2 Hz  
32 repetitions  
OBSERVE H1, 499.9290193 MHz  
DATA PROCESSING  
FT size 32768  
Total time 1 min 38 sec

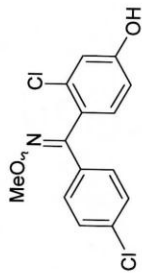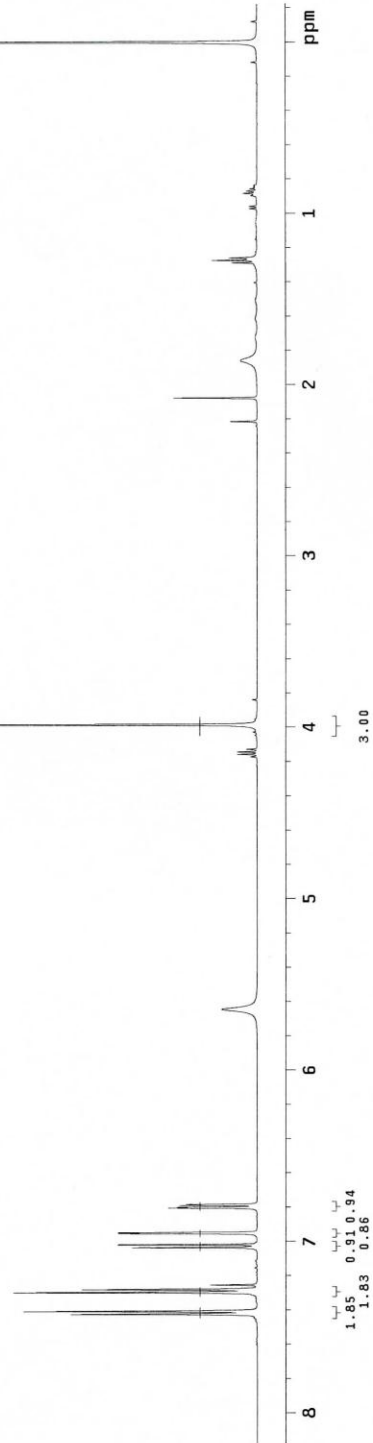

JD-129-13C

Sample Name:  
JD-129-13C  
Data Collected on:  
B137821, inovas00  
Ar: /home/vnmr1/vnmr/sys/data  
Sample directory:  
JD-129-13C.20110801\_01  
FidFile: data\_s2pu1\_001

Pulse Sequence: CARBON (s2pu1)  
Solvent: cdcl3  
Data collected on: Aug 1 2011

Temp: 23.0 C / 296.1 K  
Operator: vnmr1  
Relax. delay 1.000 sec  
Pulse 45.0 degrees  
Acq. time 1.842 sec  
Waltz: 3x21.842 sec  
10000 repetitions  
OBSERVE C13, 125.7072503 MHZ  
DECOUPLE H1, 499.9315079 MHZ  
Power 36 dB  
continuously on  
MAGNETICALLY LOCKED  
DATA PROCESSING  
Line broadening 0.5 Hz  
FT size 65536  
Total time 5 hr, 41 min

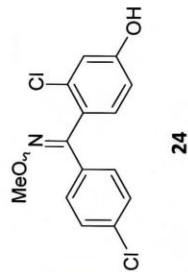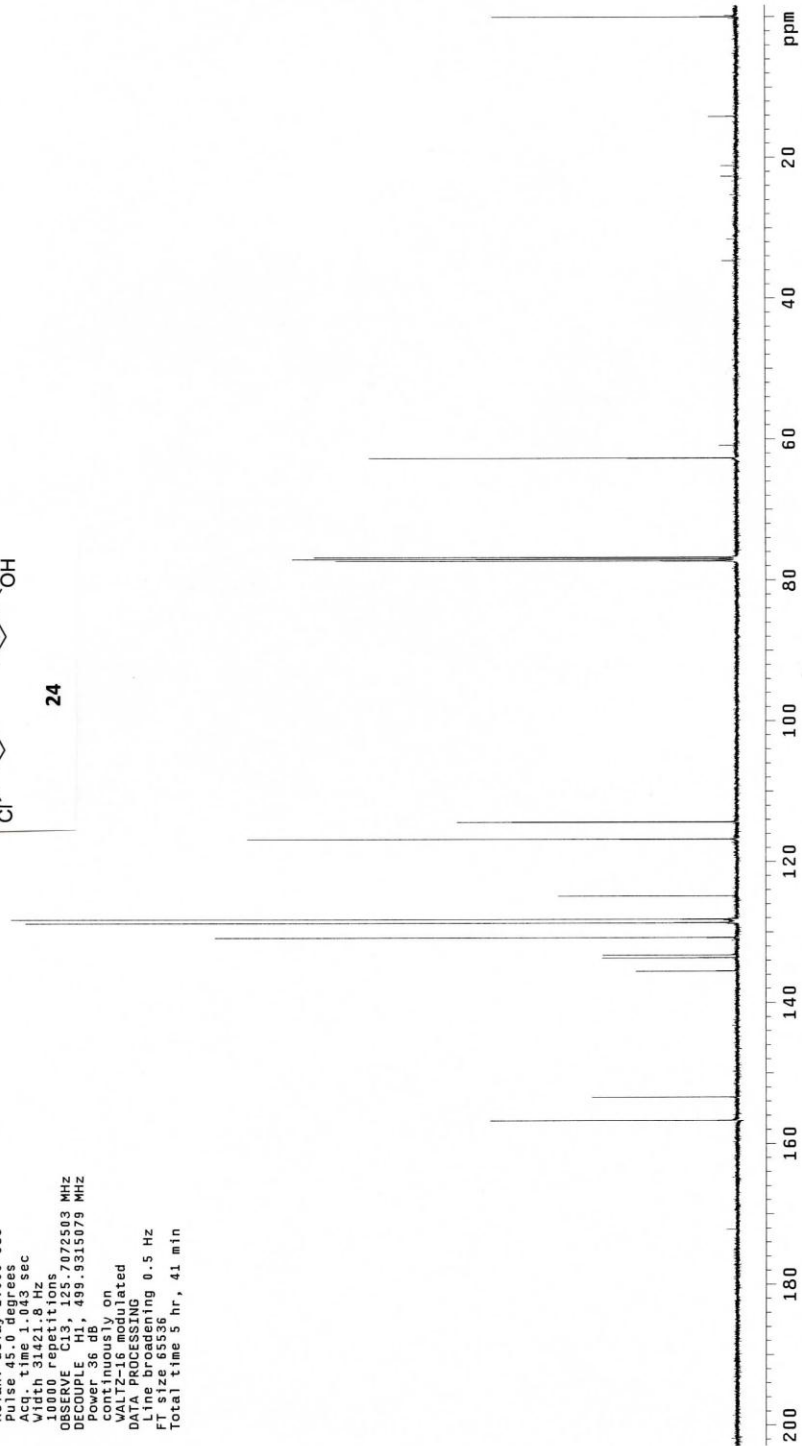



JD-132

Sample Name: JD-132  
Date Collected On: 08/01/2011  
Data Collected On: 08/01/2011  
Operator: vnmr1  
Archive directory: /home/vnmr1/vnmr5ys/data  
Sample directory: 02  
Fidfile: data\_s2pu1\_001

Pulse Sequence: PROTON (s2pu1)  
Solvent: CDCl3  
Data collected on: Aug 1 2011

Temp: 23.0 C / 296.1 K  
Operator: vnmr1  
Relax. delay: 1.000 Sec  
Sweep time: 0.000 Sec  
Acq time: 2.048 Sec  
Width: 7995.2 Hz  
16 repetitions  
OBSERVED F1 F2: 499.3269869 MHz  
0.000000000 MHz  
FT size: 32768  
Total time: 0 min 49 sec

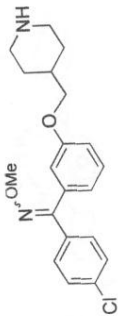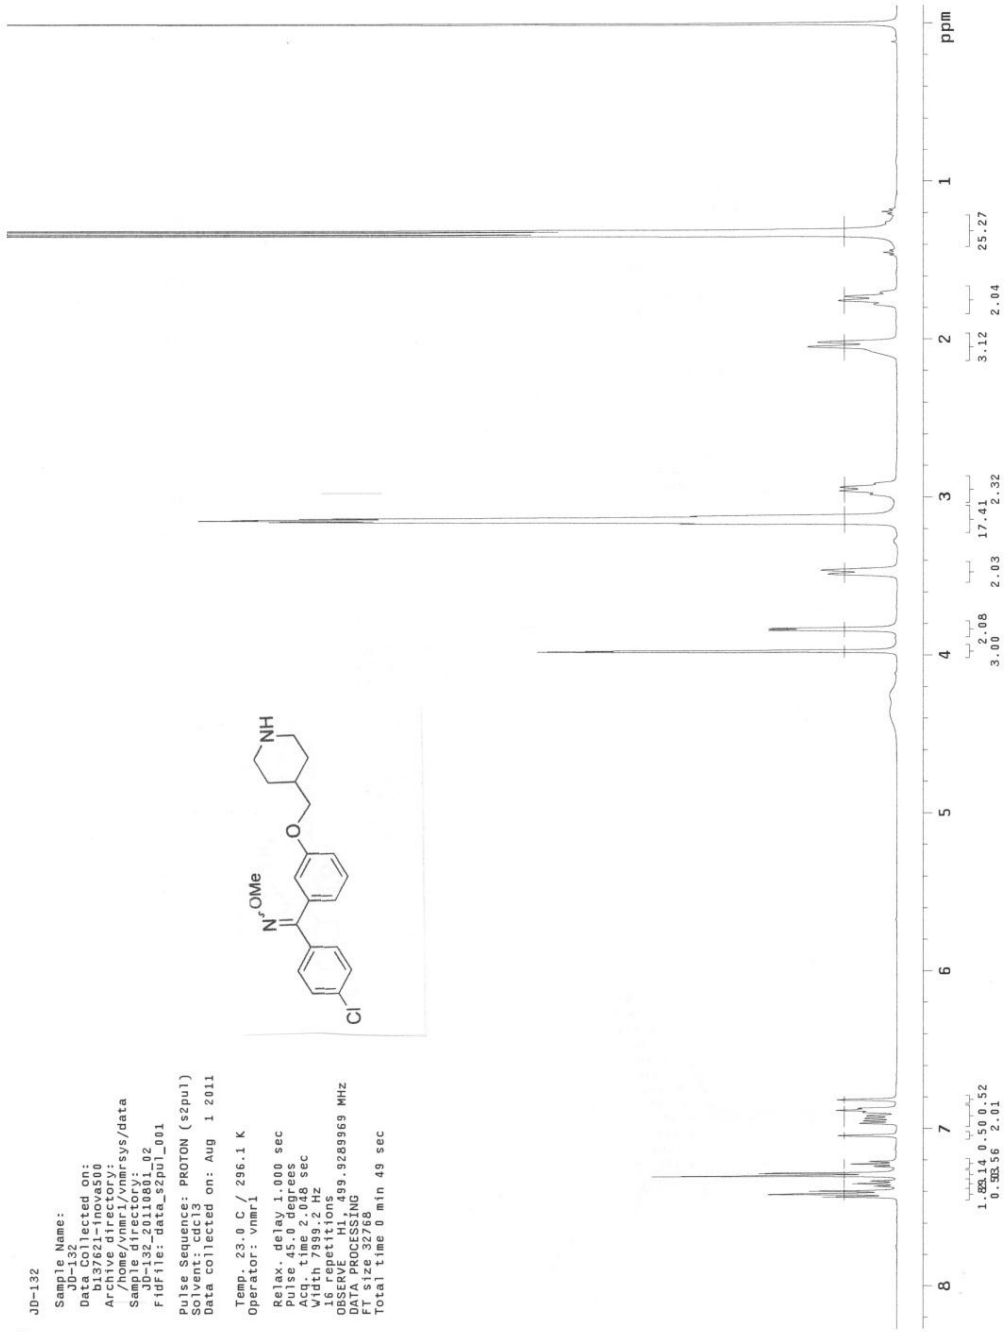

JD-127-13C

Sample Name:  
JD-127-13C  
Data collected on:  
13C2010727\_01  
Acquired on:  
/home/vnmr1/vnmr5ys/data  
Sample directory:  
JD-127-13C\_2010727\_01  
FID file: data\_scpul\_001  
Pulse Sequence: CARBON (s2pu1)  
Solvent: CDCl3  
Data collected on: Jul 27 2011

Operator: vnmr1  
Relax. delay 1.000 sec  
Pulse 45.0 degree  
Pulse program zgpg30  
Width 31421.8 Hz  
10000 repetitions  
OBSERVE C13, 125.707274 MHz  
Power 36 dB, 459.331579 MHz  
continuously on  
WALTZ-16 modulated  
DATA PROCESSING  
Solving 0.5 Hz  
FT size 65536  
Total time 5 hr, 41 min

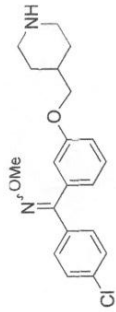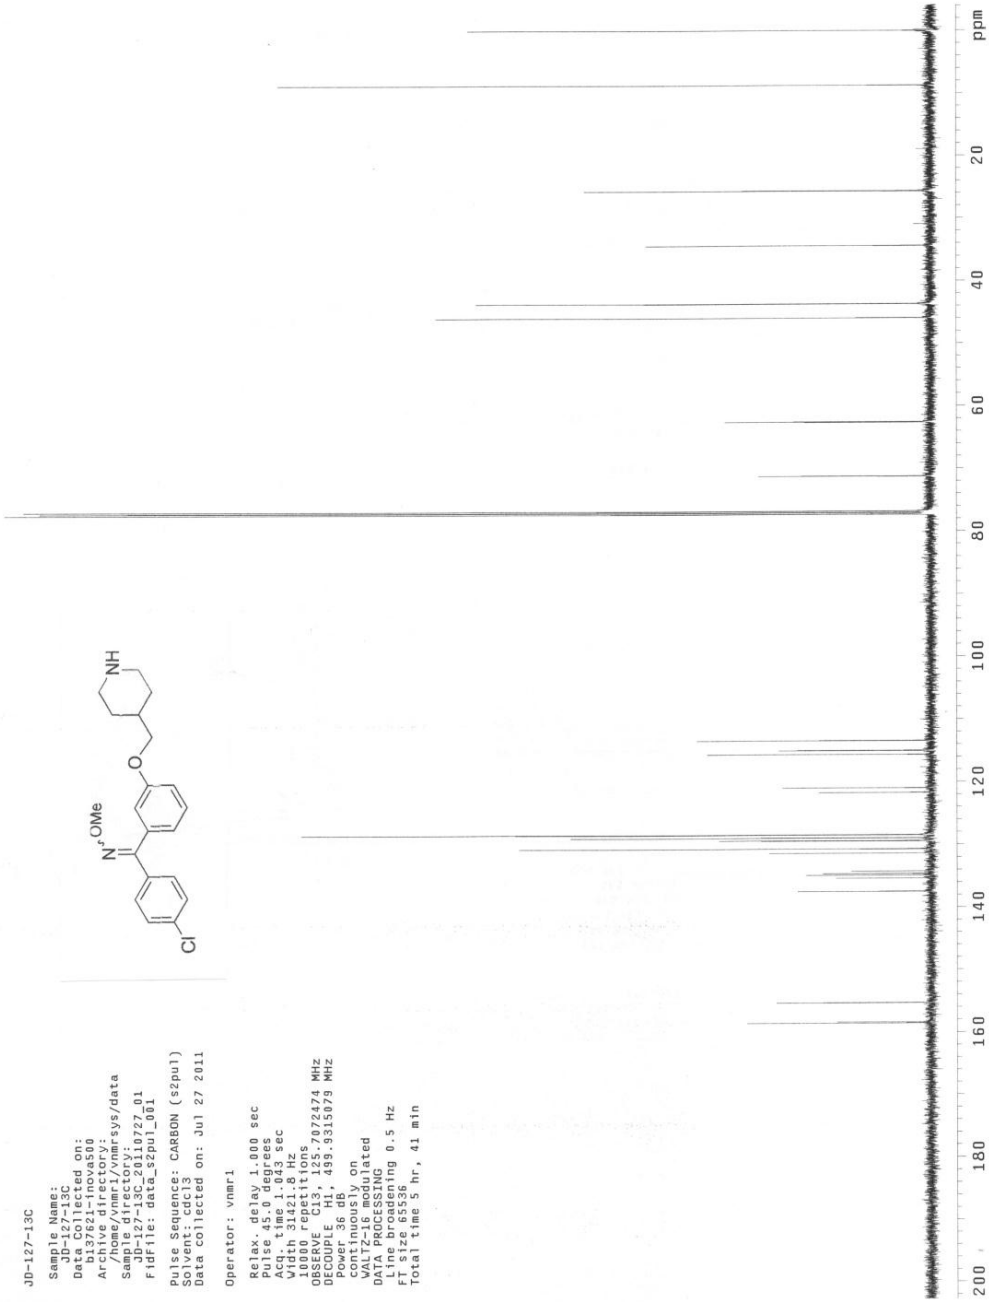

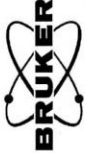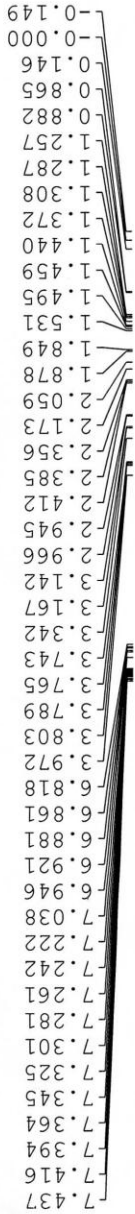

Current Data Parameters  
Date\_ Oct19-2011  
Time\_ 11:37  
EXPNO 1  
PROCNO 1  
F2 - Acquisition Parameters  
Date\_ 20111019  
Time\_ 17:37  
INSTRUM spect  
PROBHD 5 mm PABBO BB-  
PULPROG zg30  
TD 65536  
SOLVENT CDCl3  
NS 12  
DS 2  
SWH 8223.685 Hz  
FIDRES 0.125483 Hz  
AQ 3.9846387 sec  
RG 132.71  
DW 60.800 usec  
DE 1.33 usec  
TE 286.1 K  
D1 1.00000000 sec  
===== CHANNEL f1 =====  
NUC1 1H  
P1 15.00 usec  
PL1 0.00 dB  
SFO1 400.1324710 MHz  
F2 - Processing parameters  
SI 65536  
SF 400.1324710 MHz  
WDW EM  
SSB 0  
LB 0.30 Hz  
GB 0  
PC 1.00

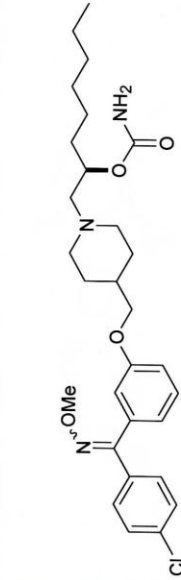

JD-181

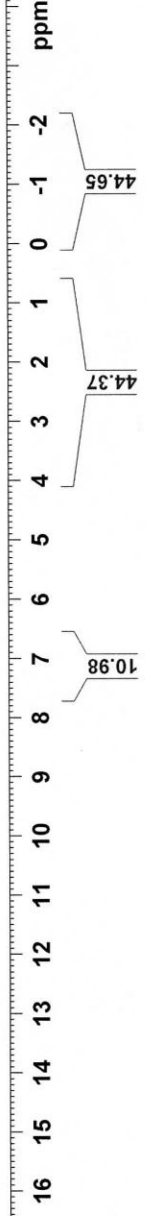

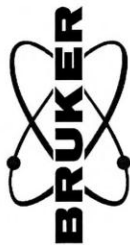

Current Data Parameters  
NAME Oct19-2011-joy  
EXPNO 20  
PROCNO 1

F2 - Acquisition Parameters

Date 20111020  
Time 7.22  
INSTRUM spect  
PROBHD 5 mm PABBO BB-  
PULPROG zgpg50  
TD 65536  
SOLVENT CDC13  
NS 13000  
DS 4  
SWH 24038.461 Hz  
FIDRES 0.366798 Hz  
AQ 1.3631988 sec  
RG 199.69  
DE 20.800 usec  
WE 6.50 usec  
TE 296.2 K  
D1 2.00000000 sec  
D11 0.03000000 sec

==== CHANNEL f1 =====  
NUC1 13C  
P1 9.25 usec  
PLW1 56.00000000 W  
SFO1 100.6228293 MHz

==== CHANNEL f2 =====  
CPDPRG2 waltz16  
NUC2 1H  
PCPD2 90.00 usec  
PLW2 15.00000000 W  
PLW12 0.36296001 W  
PLW13 0.29400000 W  
SFO2 400.1316005 MHz

F2 - Processing parameters  
SI 32768  
SF 100.6127698 MHz  
EM  
WDW 0  
SSB 0  
LB 1.00 Hz  
GB 0  
PC 1.40

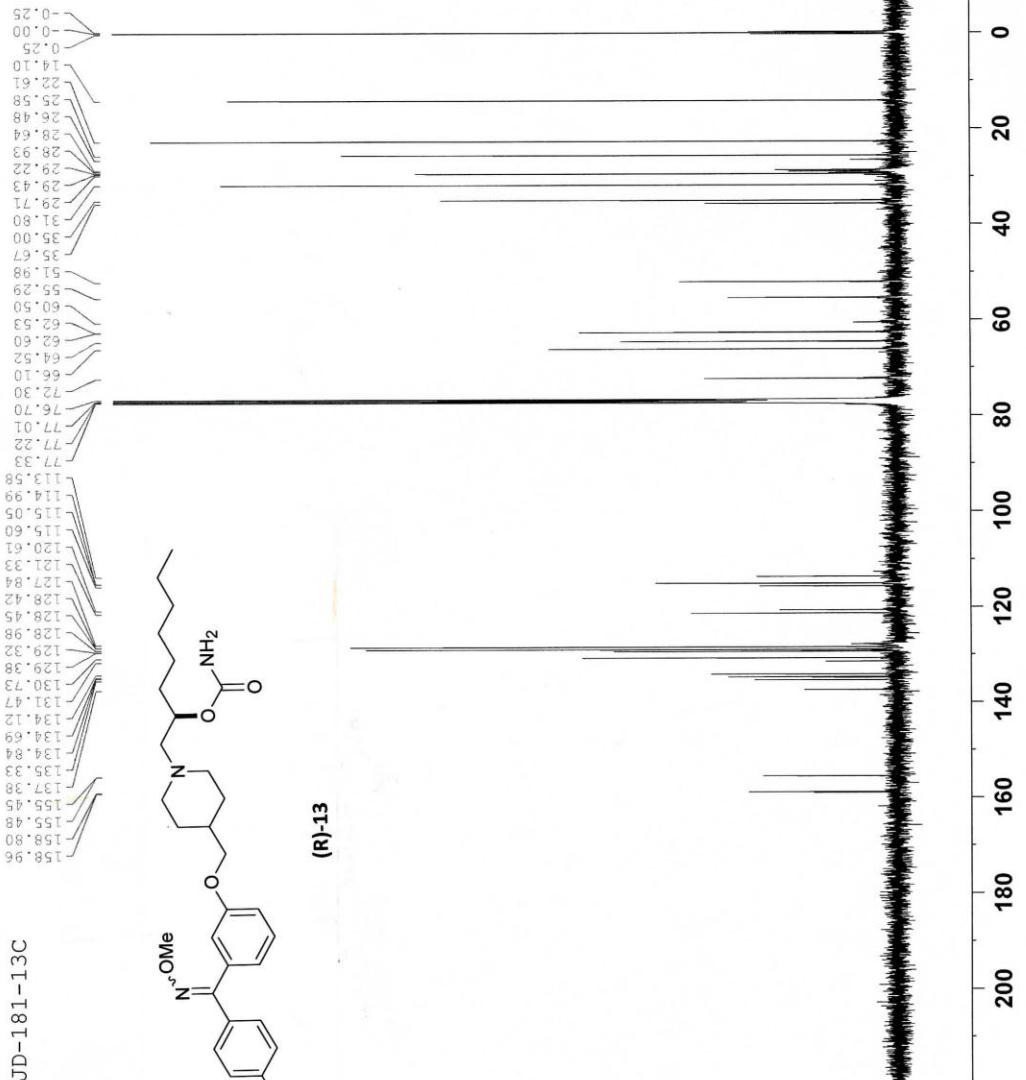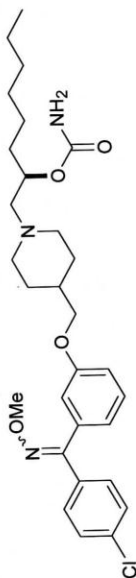

JD-181-13C

JD-1\_3-OH-Ox-R

Sample Name: JD-1\_3-OH-Ox-R  
Data Collected On: 08/16/2011  
bi37621-inova500  
Archive directory: /home/vnmr1/vnmrSYS/data  
Sample directory: 20110816\_01  
FID File: data\_s2pu1\_001  
Pulse Sequence: PROTON (s2pu1)  
Solvent: cdcl3  
Data collected on: Aug 16 2011

Operator: vnmr1  
Relax delay: 1.000 sec  
Pulse: 4.00 degrees  
Acq. time: 2.048 sec  
Width: 7899.2 Hz  
16 Repetitions  
OBSERVE: H1, 499.9290203 MHz  
DATA PROCESSING  
File size: 327.68  
Total time: 0 min 49 sec

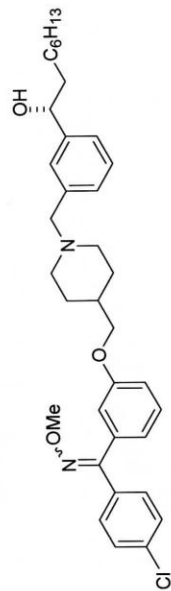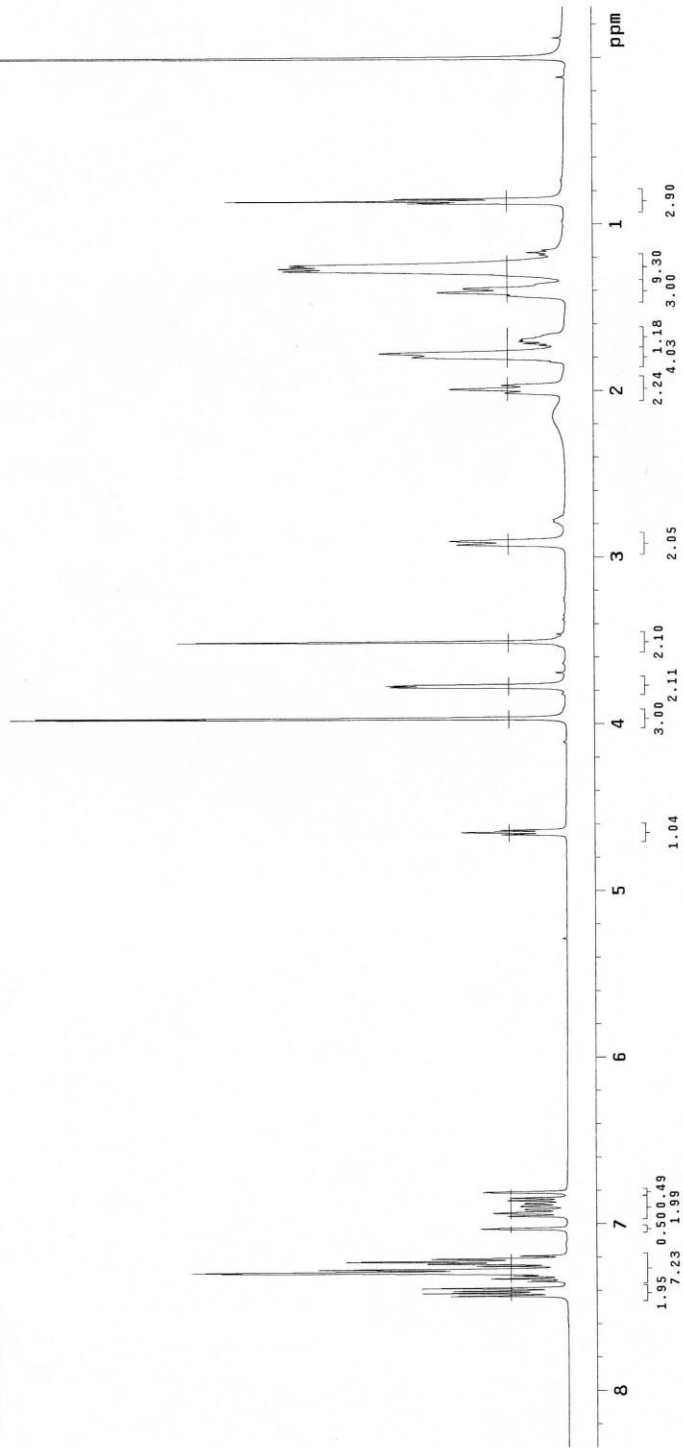

STANDARD CARBON PARAMETERS

Sample Name:  
Data Collected on:  
Archive directory:  
Sample directory:  
FidFile: CARBON  
Pulse Sequence: CARBON (s2pul)  
Solvent: cdcl3  
Data collected on: Aug 13 2011  
Temp. 24.1 C / 297.2 K  
Operator: vnmr1  
Relax. delay 1.000 sec  
Pulse 45.0 degrees  
Acq. time 1.043 sec  
Width 31421.8 Hz  
28160 repetitions  
OBSERVE C13, 125.7972691 MHz  
PULSE C13, 499.9915079 MHz  
power 36 dB,  
continuously on  
WALTZ-16 modulated  
DATA PROCESSING  
Line broadening 0.5 Hz  
F1 size 65536  
Total time 36 hr, 59 min

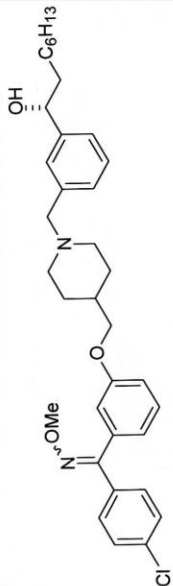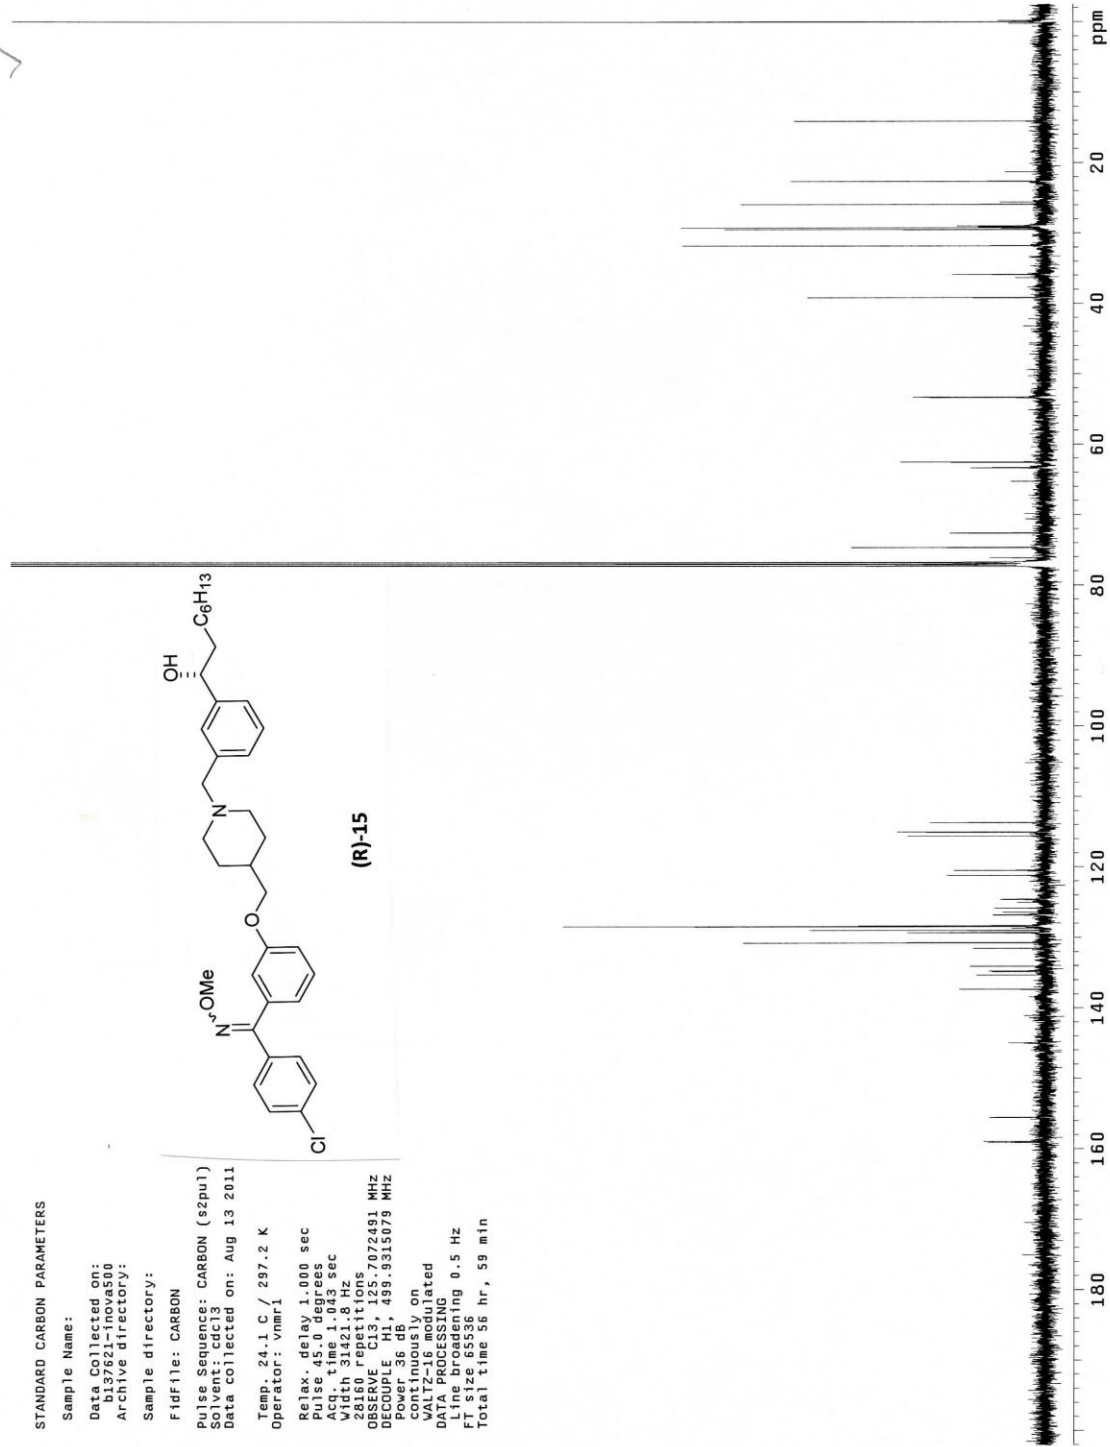

## ==== Shimadzu LabSolutions Analysis Report ====

C:\LabSolutions\Data\Project1\Joy Data\HPLC-Compound\Sample-29.lcd  
 Acquired by : System Administrator  
 Sample Name : JD-07-16-2011  
 Sample ID :  
 Tray# : 1  
 Vial# : 1  
 Injection Volume : 1  
 Data File : C:\LabSolutions\Data\Project1\Joy Data\HPLC-Compound\Sample-29.lcd  
 Method File : C:\LabSolutions\Data\Project1\Joy training\Mixture-235nm-62%ACN.lcm  
 Report Format File : C:\LabSolutions\System\DEFAULT.lsr  
 Month-Day Acquired : 10/5/2011  
 Month-Day Processed : 10/5/2011

### <Chromatogram>

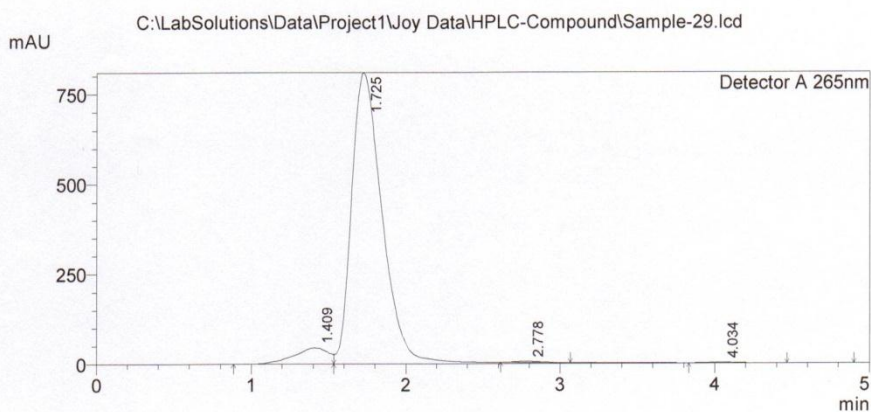

MS Chromatogram

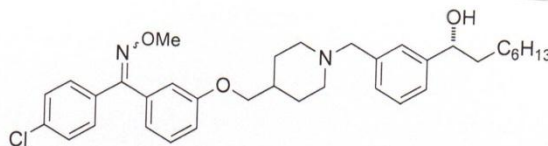

Column: Phenomenex kinetex 2.6 $\mu$  C18 100A, 100 x 4.60 mm  
 Solvent: CH<sub>3</sub>CN/0.05%TFA in H<sub>2</sub>O = 25/1  
 flow rate: 0.5 mL/min.

C:\LabSolutions\Data\Project1\Joy Data\HPLC-Compound\Sample-29.lcd

JD-146

Sample Name:  
Data Collected on:  
bi37621-inova500  
Archive directory:  
/home/vnmr1/vnmrSYS/data  
Sample directory:  
bi37621-01  
FidFile: data\_s2pul\_001  
Pulse Sequence: PROTON (s2pul)  
Solvent: cdcl3  
Data collected on: Aug 13 2011

Operator: vnmr1  
RG1x: delay 1.000 sec  
Puls: 45.0 degrees  
Acq: time 2.048 sec  
Width 7999.2 Hz  
16 repetitions  
OBSERVE H1, 499.9250174 MHz  
DATA PROCESSING  
F1: size 32785  
Total time 0 min 49 sec

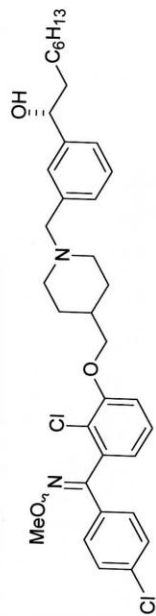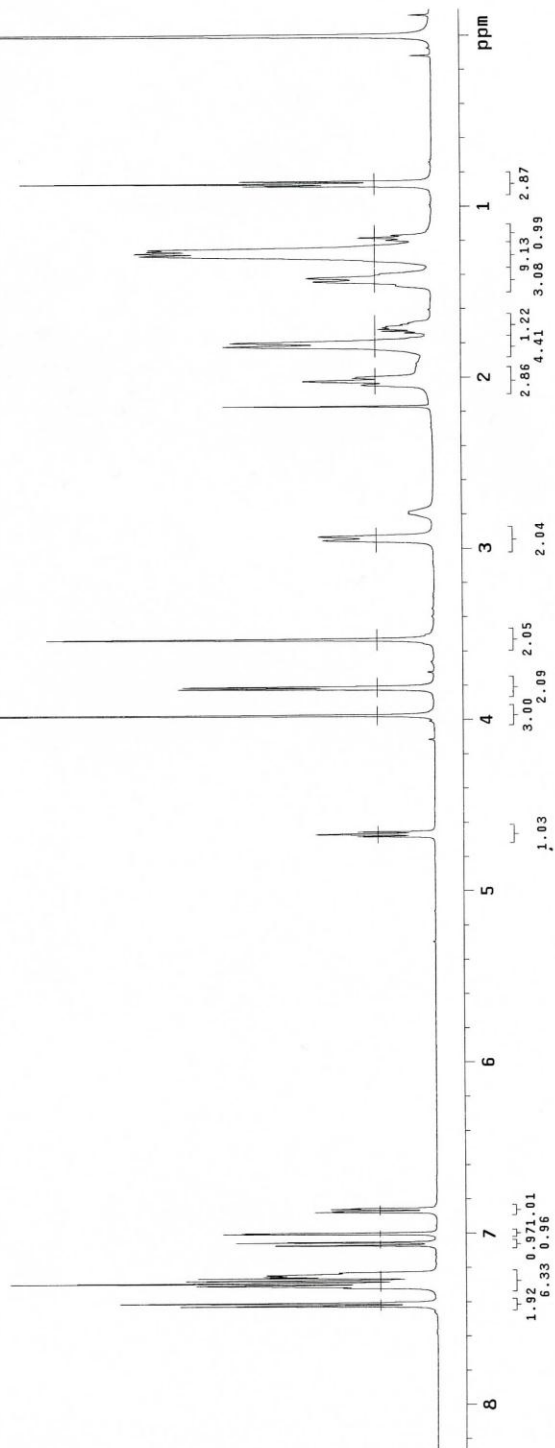



STANDARD CARBON PARAMETERS

Sample Name:

Data Collected on:  
b137621-inoxa500  
Archive directory:

Sample directory:

FidFile: CARBON

Pulse Sequence: CARBON (s2pu1)  
Solvent: cdcl3  
Data collected on: Aug 13 2011

Temp. 24.3 C / 297.4 K

Operator: vnmr1

Relax. delay 1.000 sec

Pulse 45.0 degrees

Acq. time 1.043 sec

Width 31421.8 Hz

Observed F1 125.7672491 MHZ

Observed F2 499.9315079 MHZ

DECOUPLE CH1, 499.9315079 MHZ

Power 36 dB,

continuously on

WALTZ-16 modulated

DATA PROCESSING

Line broadening 0.5 Hz

Hz 59

Total time 56 hr, 59 min

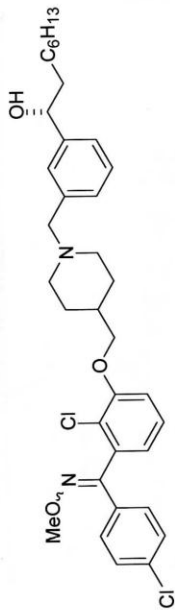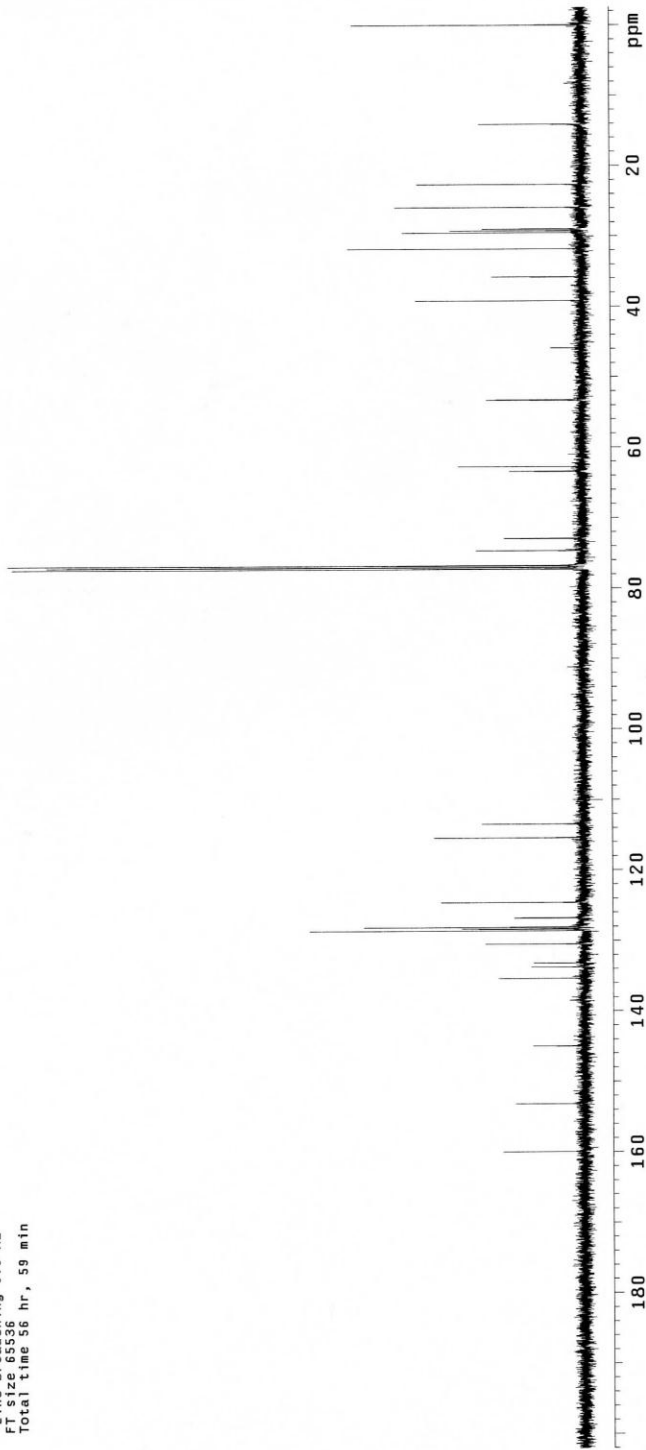

JD-146  
 Sample Name:  
 JD-146  
 Data Collected on:  
 b137621-inoxa500  
 Archive directory:  
 /home/vnmr1/vnmrSYS/data  
 Sample ID:  
 JD-146 20110813\_01  
 F1dFile: data\_s2pu1\_001  
 Pulse Sequence: PROTON (s2pu1)  
 Solvent: cdcl3  
 Data collected on: Aug 13 2011  
 Operator: vnmr1  
 Relax delay 1.000 sec  
 Pulse 45.0 degrees  
 Acq. time 2.048 sec  
 Width 7899.2 Hz  
 16 Repetitions  
 OBSERVE H1, 499.9290174 MHz  
 DATA PROCESSING  
 F1z: z2283  
 Total time 0 min 49 sec

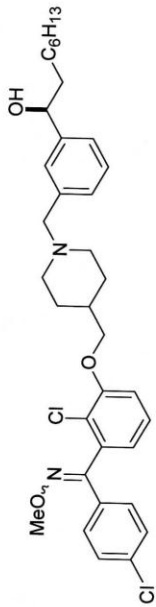

(R)-20

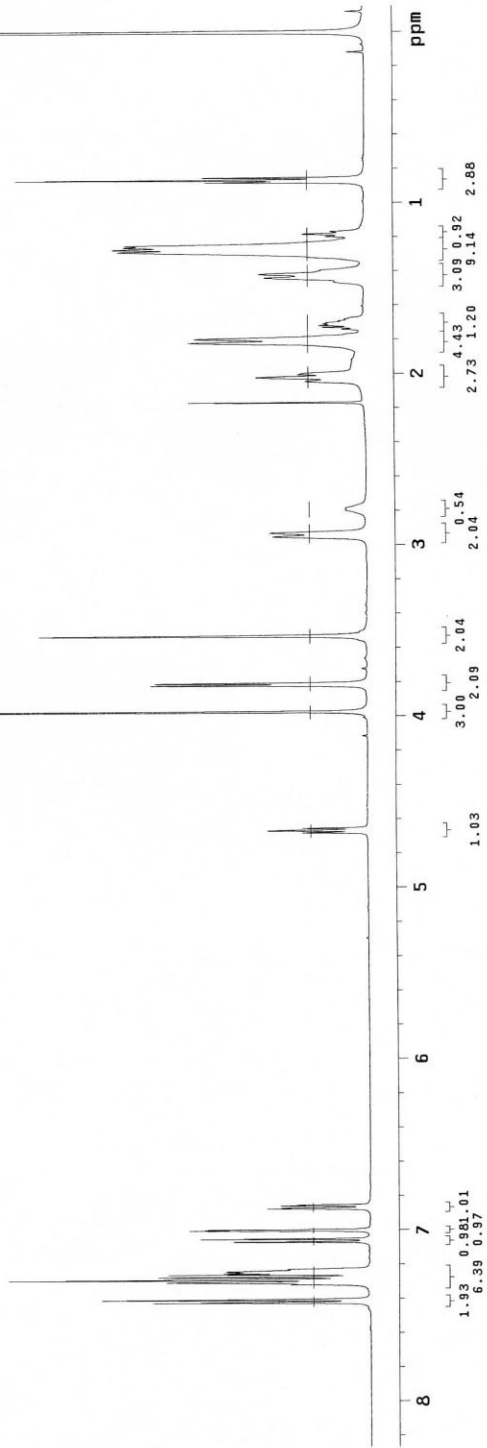

STANDARD CARBON PARAMETERS

Sample Name:  
 Data Collected on:  
 Archive directory:  
 Sample directory:  
 FidFile: CARBON  
 Pulse Sequence: CARBON (s2pul)  
 Solvent: cdcl3  
 Data collected on: Aug 13 2011  
 Temp. 24.3 C / 297.4 K  
 Operator: vmmr1  
 Relax. delay 1.000 sec  
 Pulse 45.0 degrees  
 Acq. time 1.043 sec  
 Width 31421.8 Hz  
 2112 repetitions  
 OBSERVE C13, 125.7072491 MHZ  
 DECOUPLE H1, 499.9315079 MHZ  
 continuously on  
 WALTZ-16 modulated  
 DATA PROCESSING  
 Line broadening 0.5 Hz  
 FT size 65536  
 Total time 56 hr, 59 min

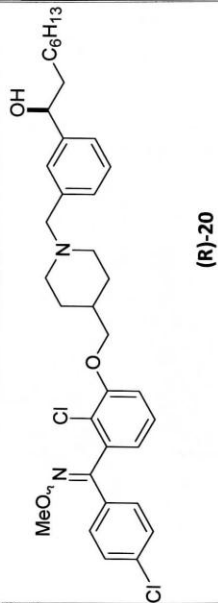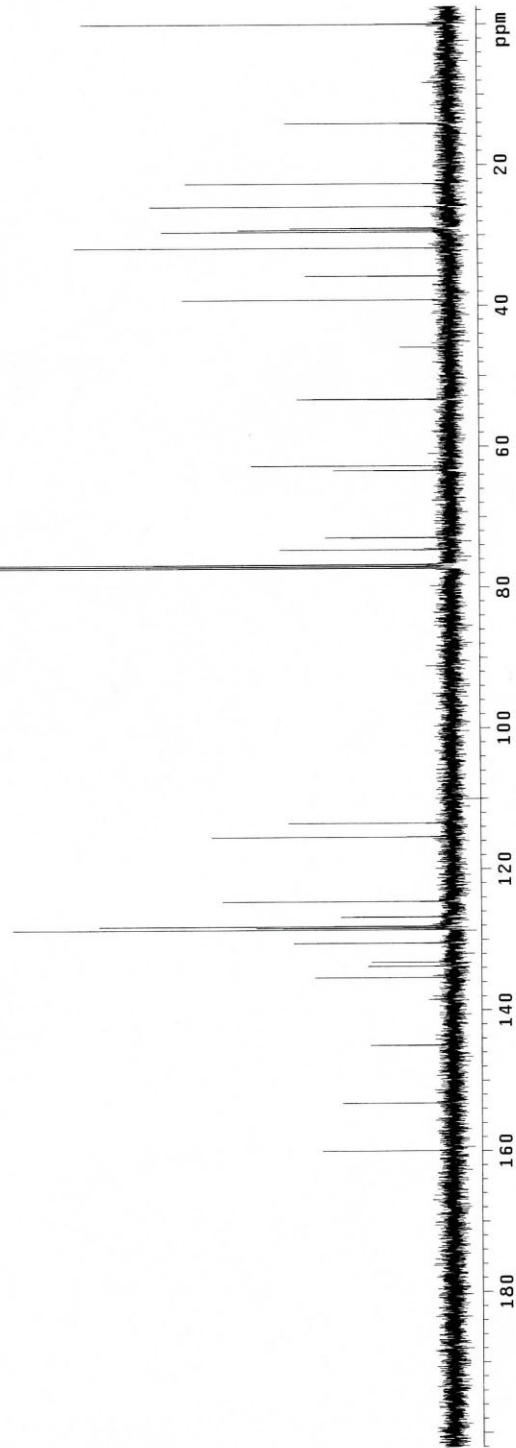

Supplement: NIHMS366951-supplement-SI.pdf [file NIHMS366951-supplement-SI.pdf]
